# Supplementary material for: Cyano- and Ketone-Containing Selenoesters as Multi-Target Compounds against Resistant Cancers
Source: MDPI journal article supplement (doi:10.3390/cancers13184563), 2021-09-11
Supplement: s1 [file s1]

# Supplementary Materials: Cyano- and ketone-containing selenoesters as multi-target compounds against resistant cancers

Nikoletta Szemerédi, Simona Dobiasová, Noemi Salardón-Jiménez, Annamária Kincses, Márta Nové, Giyaullah Habibullah, Clotilde Sevilla-Hernández, Miguel Benito-Lama, Francisco-Javier Alonso-Martínez, Jitka Viktorová, Gabriella Spengler and Enrique Domínguez-Álvarez

## Contents

All compounds have FTIR, MS-DIP,  $^1\text{H}$ -NMR and  $^{13}\text{C}$ -NMR spectra. Zooms of the aromatic region of  $^1\text{H}$ -NMR have been added for all compounds, and when necessary, also zooms of the aromatic peaks in  $^{13}\text{C}$ -NMR are provided. Bidimensional COSY, HSQC and HMBC have been provided for selected compounds.

|                                                                                           |         |
|-------------------------------------------------------------------------------------------|---------|
| <b>Spectra of the ketone selenoesters (K1-K8) and methylcyano selenoesters (N1-N7).</b>   | Page 2  |
| S1. Compound <b>K1</b> : <i>Se</i> -(2-oxopropyl) thiophene-2-carboselenoate.             | Page 2  |
| S2. Compound <b>K2</b> : <i>Se</i> -(2-oxopropyl) 2-fluorobenzoselenoate.                 | Page 6  |
| S3. Compound <b>K3</b> : <i>Se</i> -(2-oxopropyl) 4-bromobenzoselenoate.                  | Page 9  |
| S4. Compound <b>K4</b> : <i>Se</i> -(2-oxopropyl) 2-(trifluoromethyl)benzoselenoate.      | Page 13 |
| S5. Compound <b>K5</b> : <i>Se</i> -(2-oxopropyl) 3-(trifluoromethyl)benzoselenoate.      | Page 16 |
| S6. Compound <b>K6</b> : <i>Se</i> -(2-oxopropyl) 3-chloro-4-fluorobenzoselenoate.        | Page 19 |
| S7. Compound <b>K7</b> : <i>Se</i> -(2-oxopropyl) 4-( <i>tert</i> -butyl)benzoselenoate.  | Page 22 |
| S8. Compound <b>K8</b> : <i>Se</i> -(2-oxopropyl) 2,4,5-trifluorobenzoselenoate.          | Page 26 |
| S9. Compound <b>N1</b> : <i>Se</i> -(cyanomethyl) thiophene-2-carboselenoate.             | Page 31 |
| S10. Compound <b>N2</b> : <i>Se</i> -(cyanomethyl) 3-fluorobenzoselenoate.                | Page 35 |
| S11. Compound <b>N3</b> : <i>Se</i> -(cyanomethyl) 4-bromobenzoselenoate.                 | Page 38 |
| S12. Compound <b>N4</b> : <i>Se</i> -(cyanomethyl) 2-(trifluoromethyl)benzoselenoate.     | Page 41 |
| S13. Compound <b>N5</b> : <i>Se</i> -(cyanomethyl) 3-(trifluoromethyl)benzoselenoate.     | Page 44 |
| S14. Compound <b>N6</b> : <i>Se</i> -(cyanomethyl) 3-chloro-4-fluorobenzoselenoate.       | Page 49 |
| S15. Compound <b>N7</b> : <i>Se</i> -(cyanomethyl) 4-( <i>tert</i> -butyl)benzoselenoate. | Page 52 |

## Spectra of the ketone selenoesters (K1-K8) and methylcyano selenoesters (N1-N7).

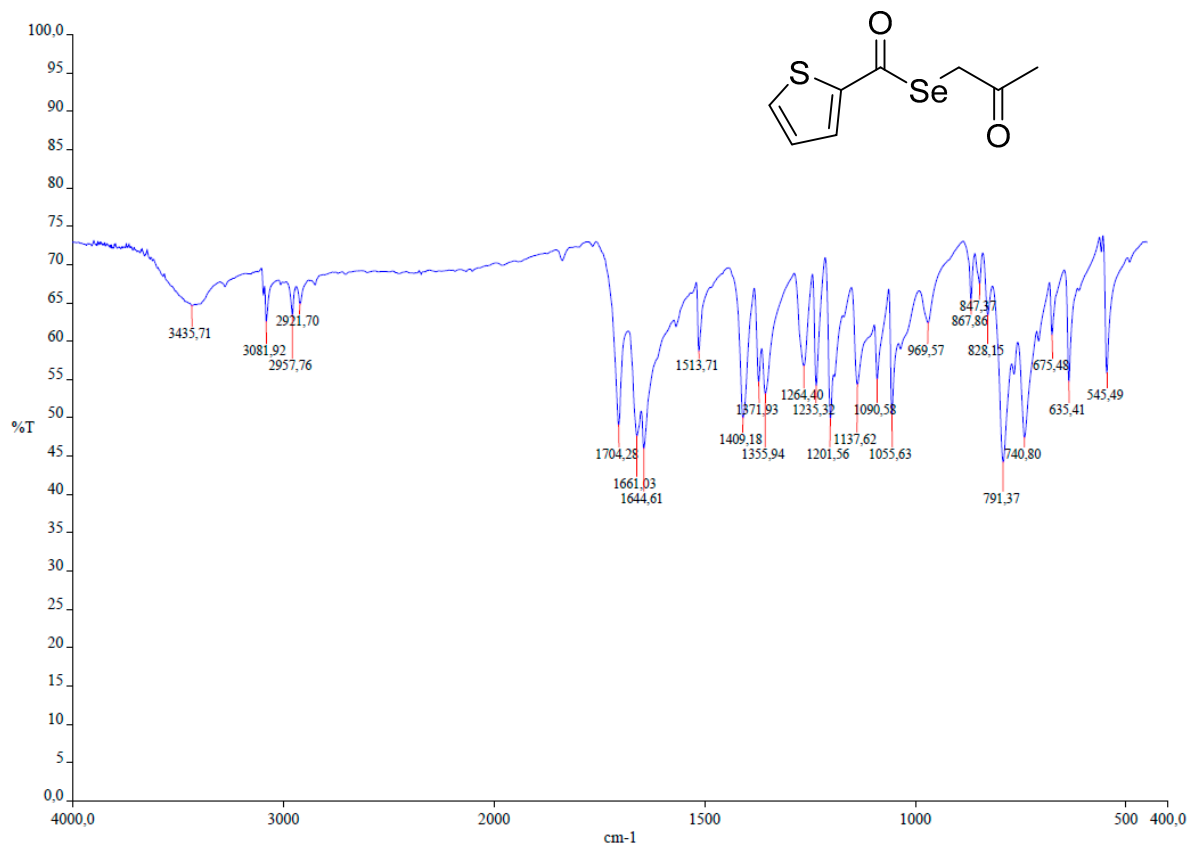**Figure S1.** Compound K1: Se-(2-oxopropyl) thiophene-2-carboselenoate. S1A. IR spectrum (KBr) of K1.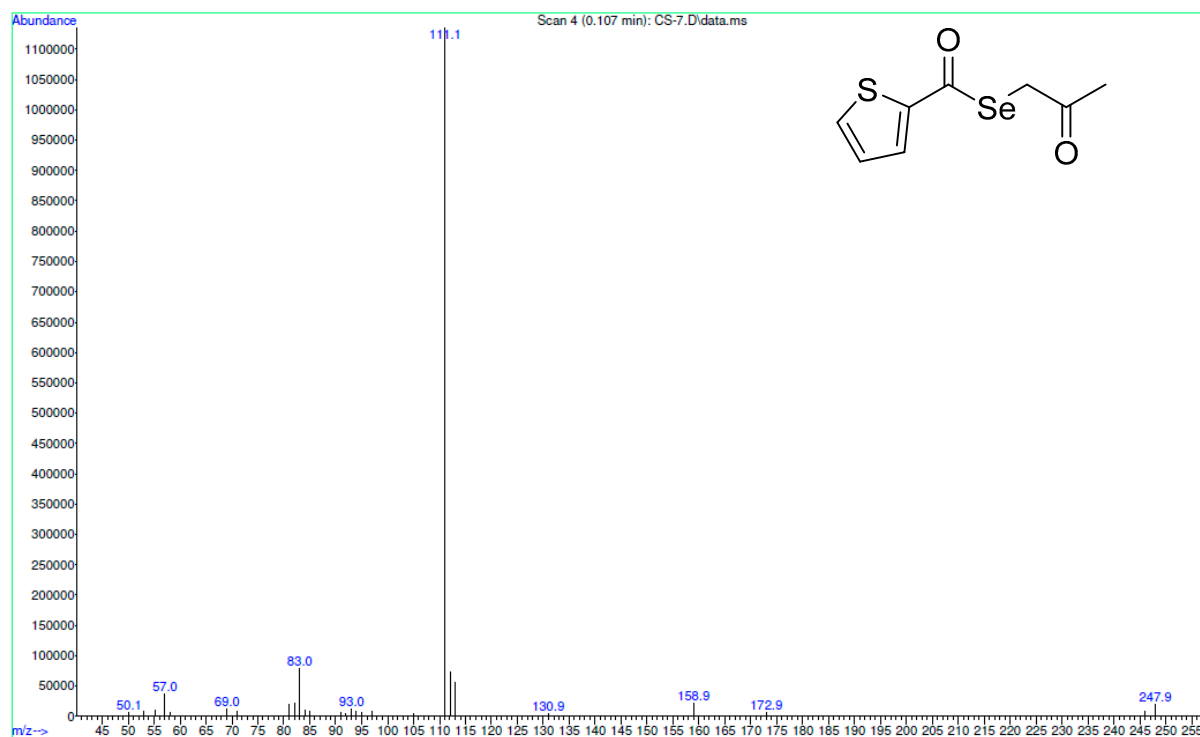**Figure S1B.** DIP-MS spectrum of K1.

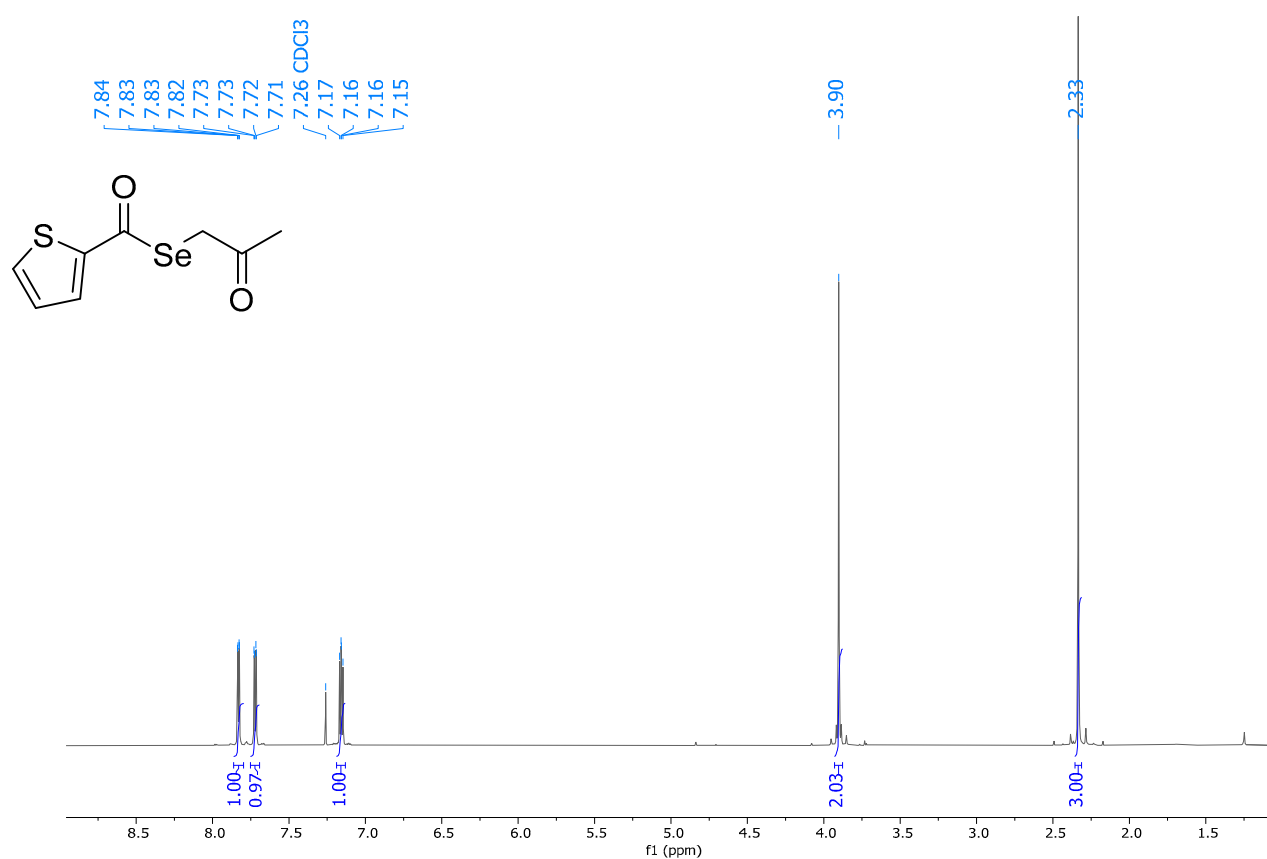

Figure S1C. <sup>1</sup>H-NMR spectrum (CDCl<sub>3</sub>, 400 MHz) of K1.

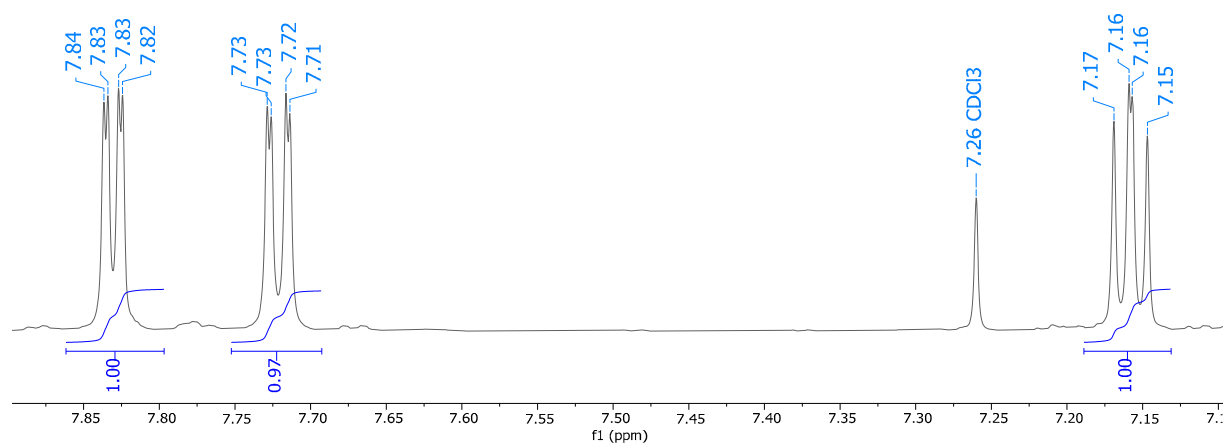

Figure S1D. <sup>1</sup>H-NMR spectrum (CDCl<sub>3</sub>, 400 MHz) of K1 (aromatics).

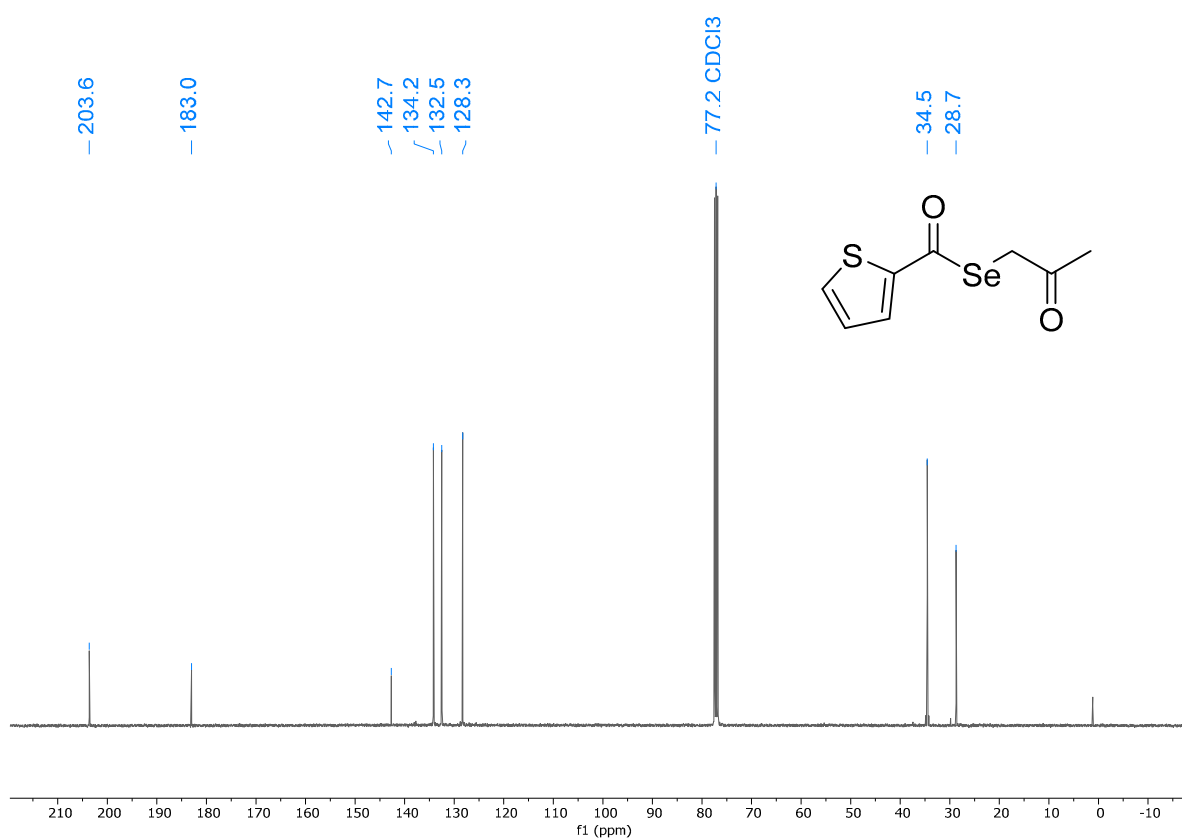

Figure S1E. <sup>13</sup>C-NMR spectrum (CDCl<sub>3</sub>, 101 MHz) of K1.

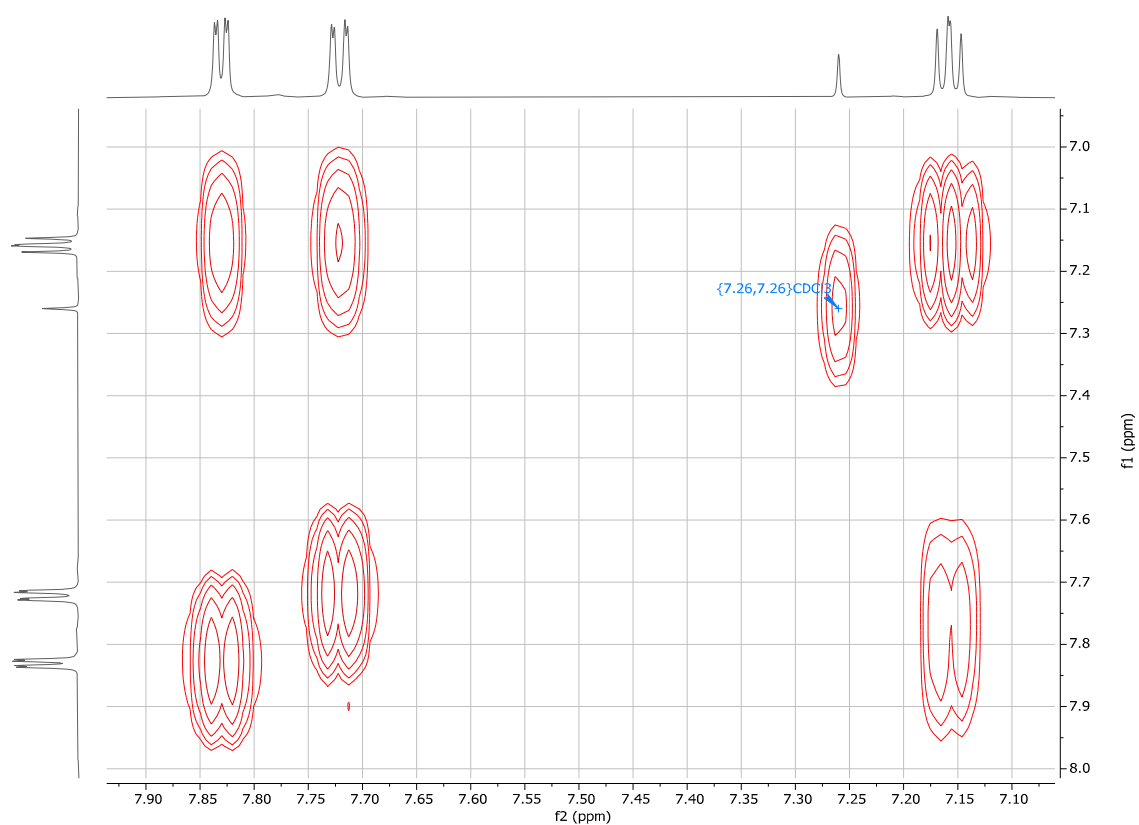

Figure S1F. <sup>1</sup>H-<sup>1</sup>H COSY NMR spectrum (CDCl<sub>3</sub>) of K1 (aromatics).

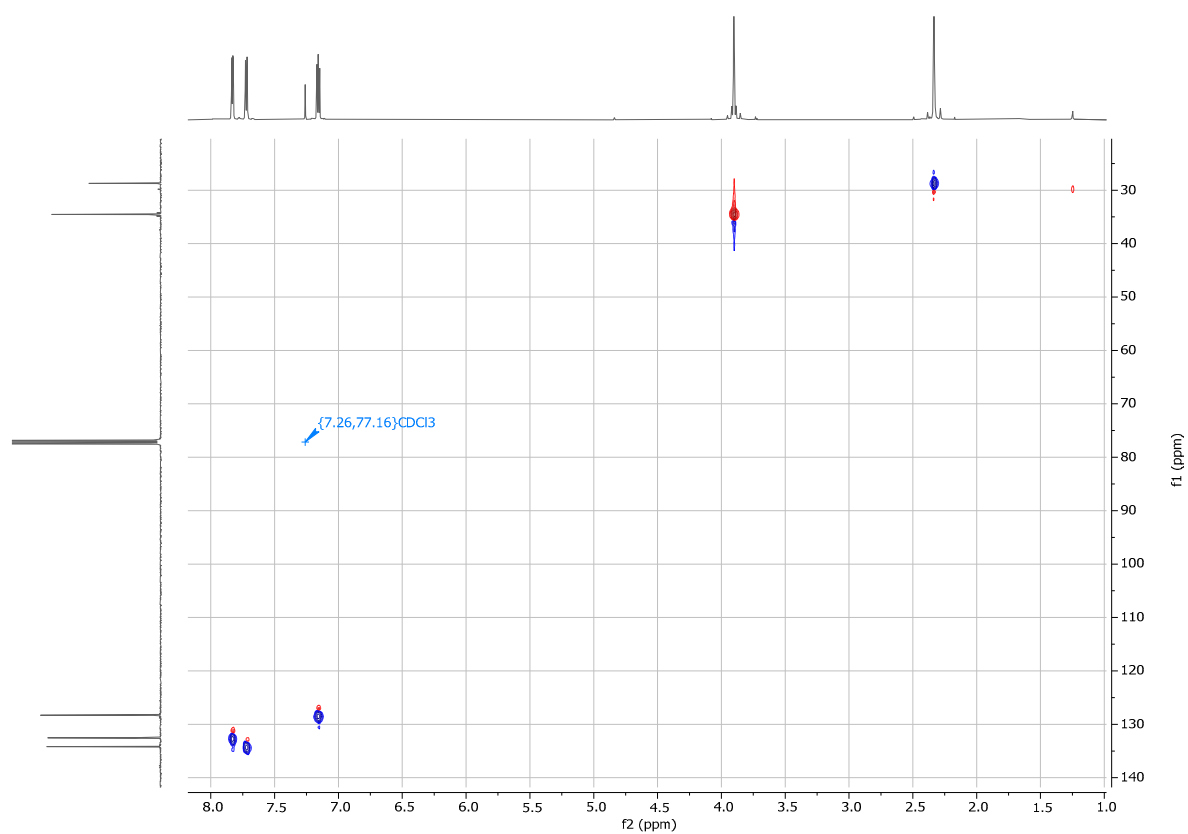

**Figure S1G.**  $^1\text{H}$ - $^{13}\text{C}$  HSQC NMR spectrum ( $\text{CDCl}_3$ ) of K1.

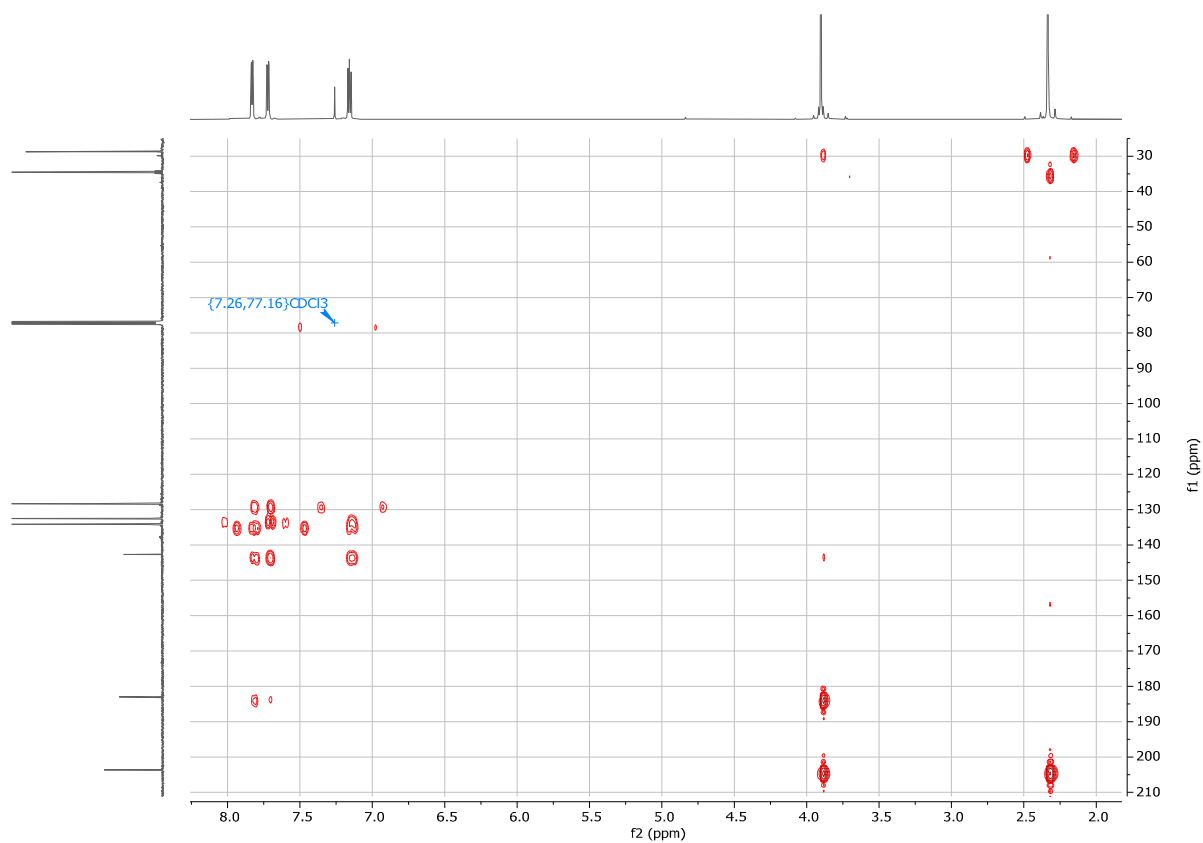

**Figure S1H.**  $^1\text{H}$ - $^{13}\text{C}$  HMBC NMR spectrum ( $\text{CDCl}_3$ ) of K1.

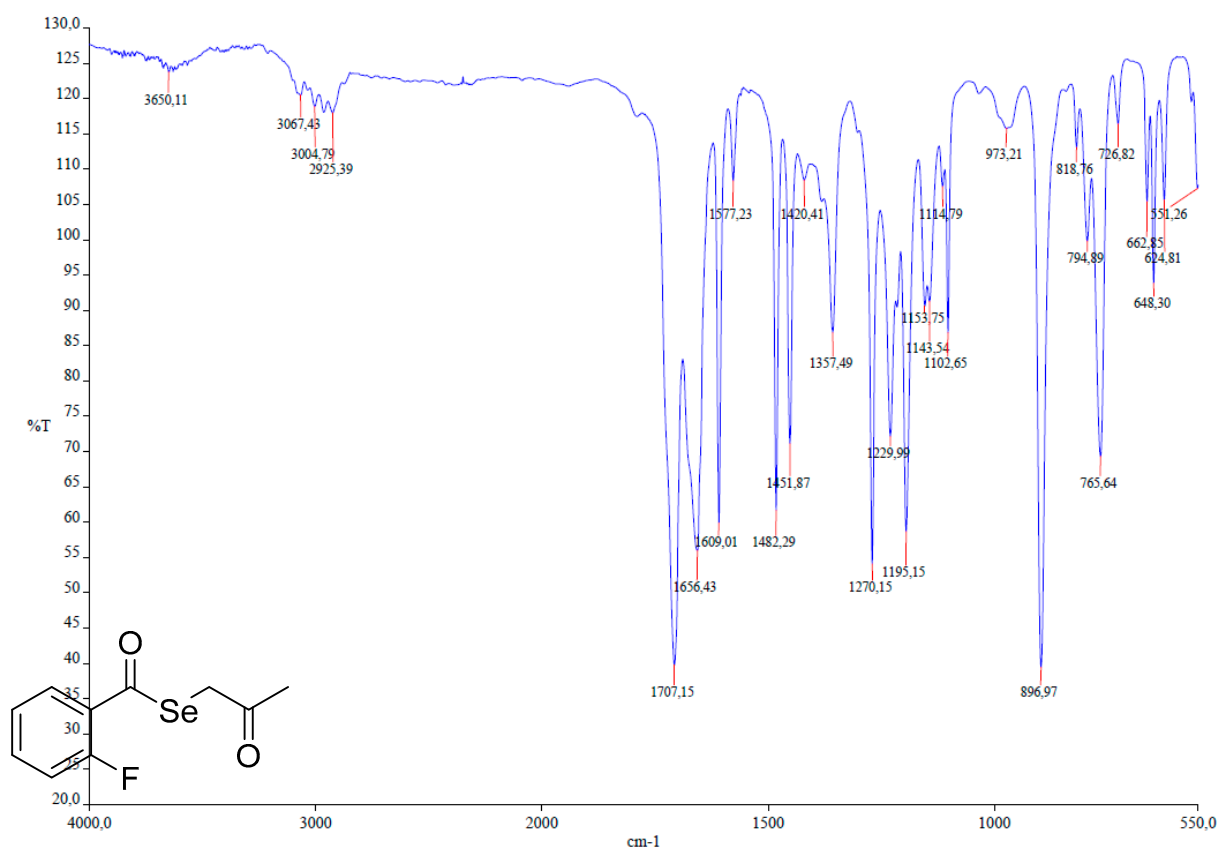

Figure S2. Compound K2: Se-(2-oxopropyl) 2-fluorobenzoselenoate. S2A. IR spectrum (NaCl) of K2.

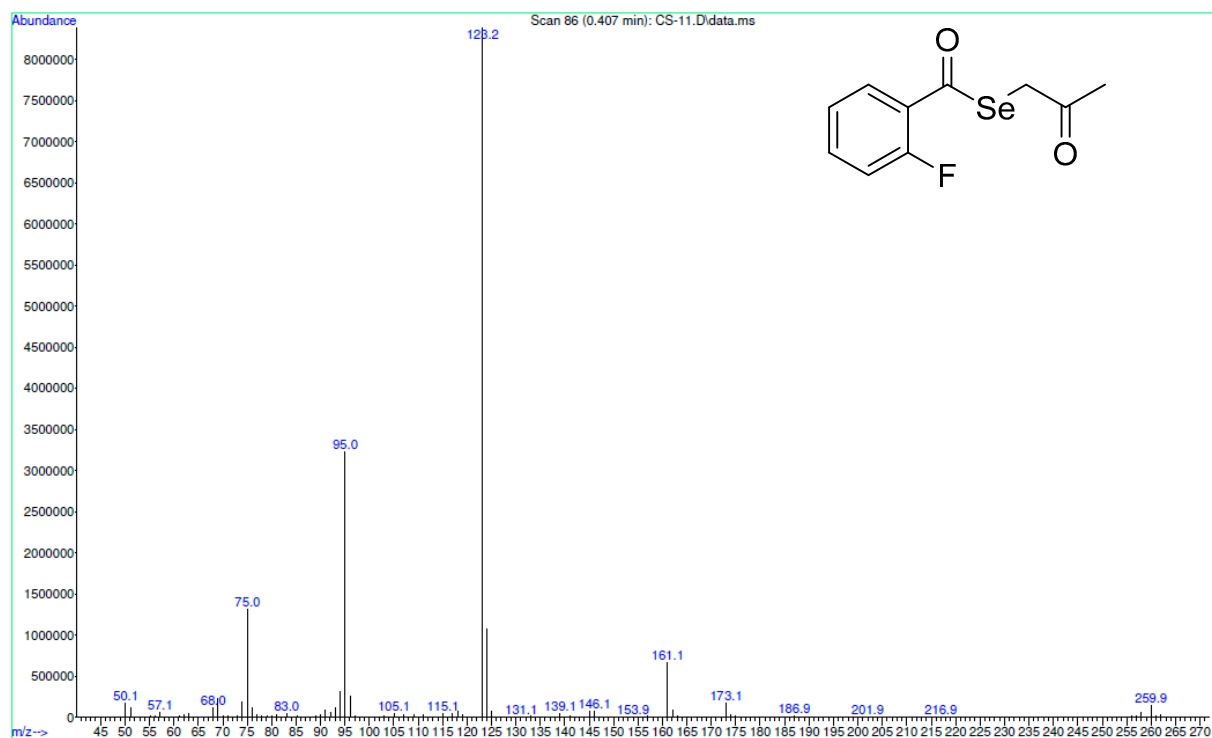

Figure S2B. DIP-MS spectrum of K2.

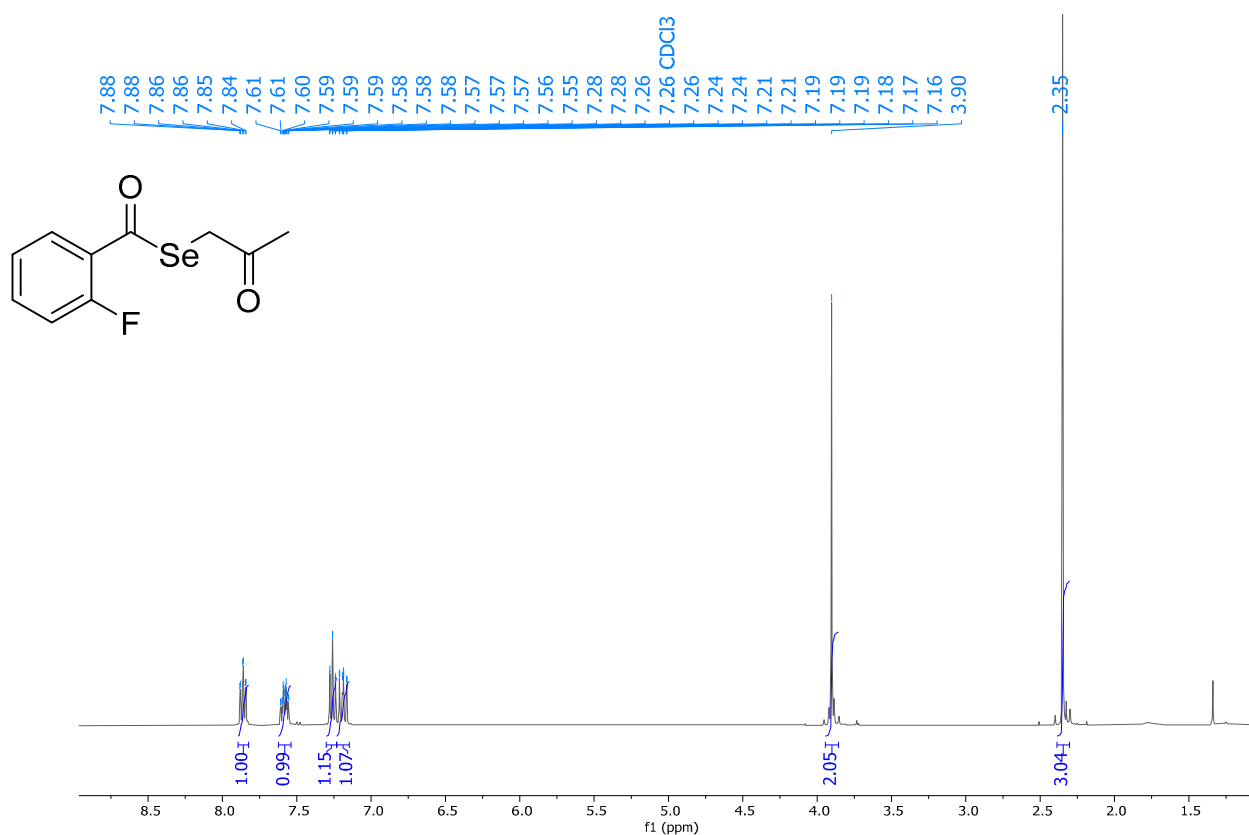Figure S2C. <sup>1</sup>H-NMR spectrum (CDCl<sub>3</sub>, 400 MHz) of K2.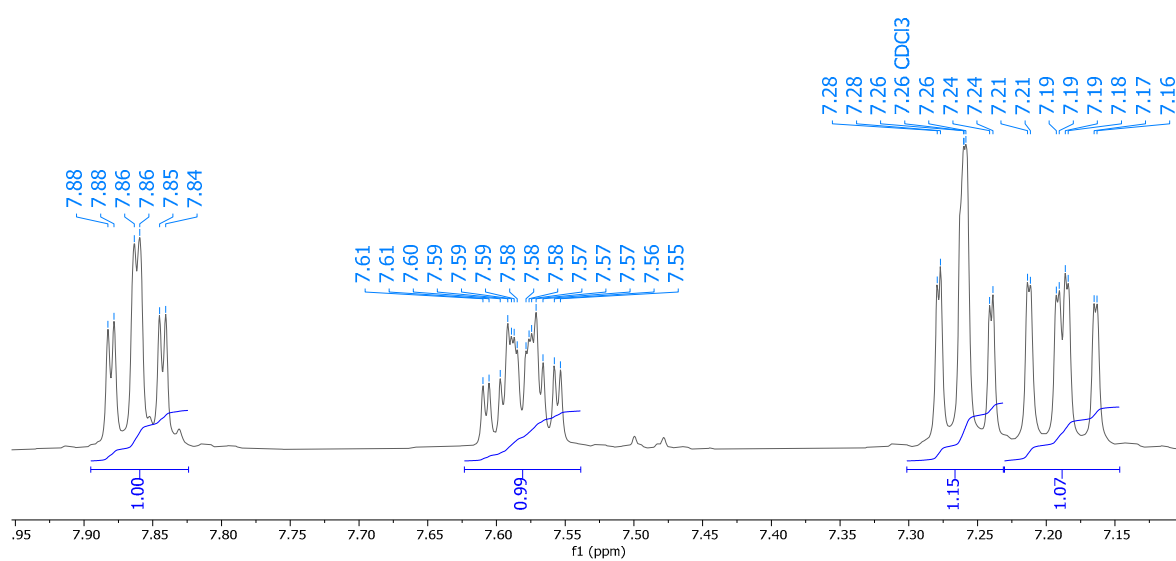Figure S2D. <sup>1</sup>H-NMR spectrum (CDCl<sub>3</sub>, 400 MHz) of K2 (aromatics).

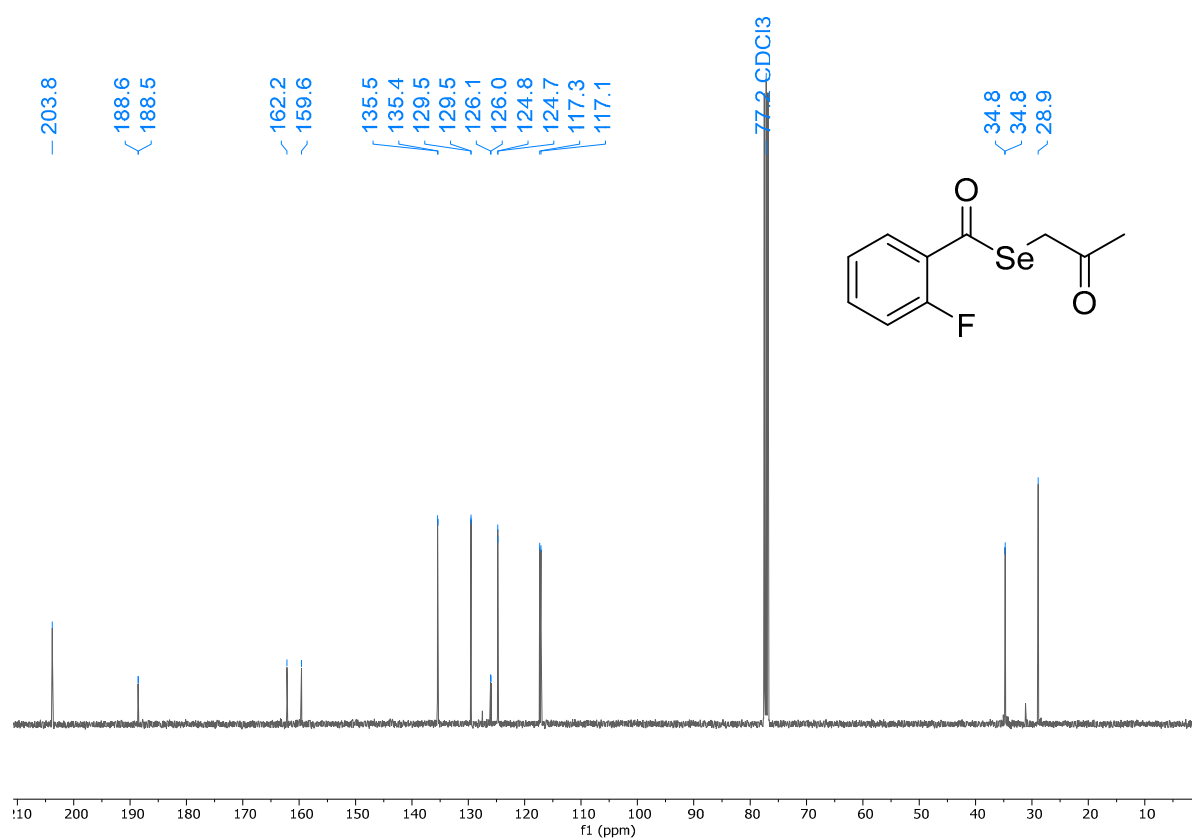

Figure S2E. <sup>13</sup>C-NMR spectrum (CDCl<sub>3</sub>, 101 MHz) of **K2**.

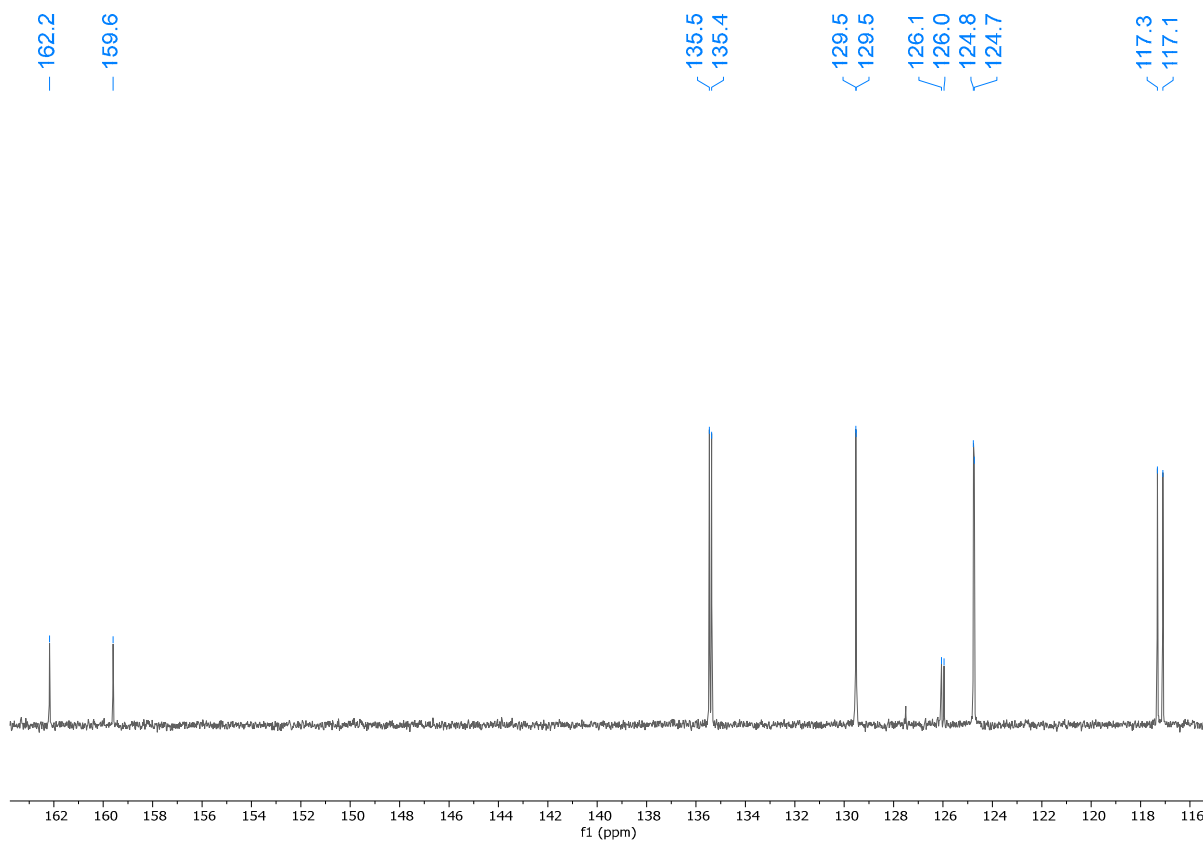

Figure S2F. <sup>13</sup>C-NMR spectrum (CDCl<sub>3</sub>, 101 MHz) of **K2** (aromatics).



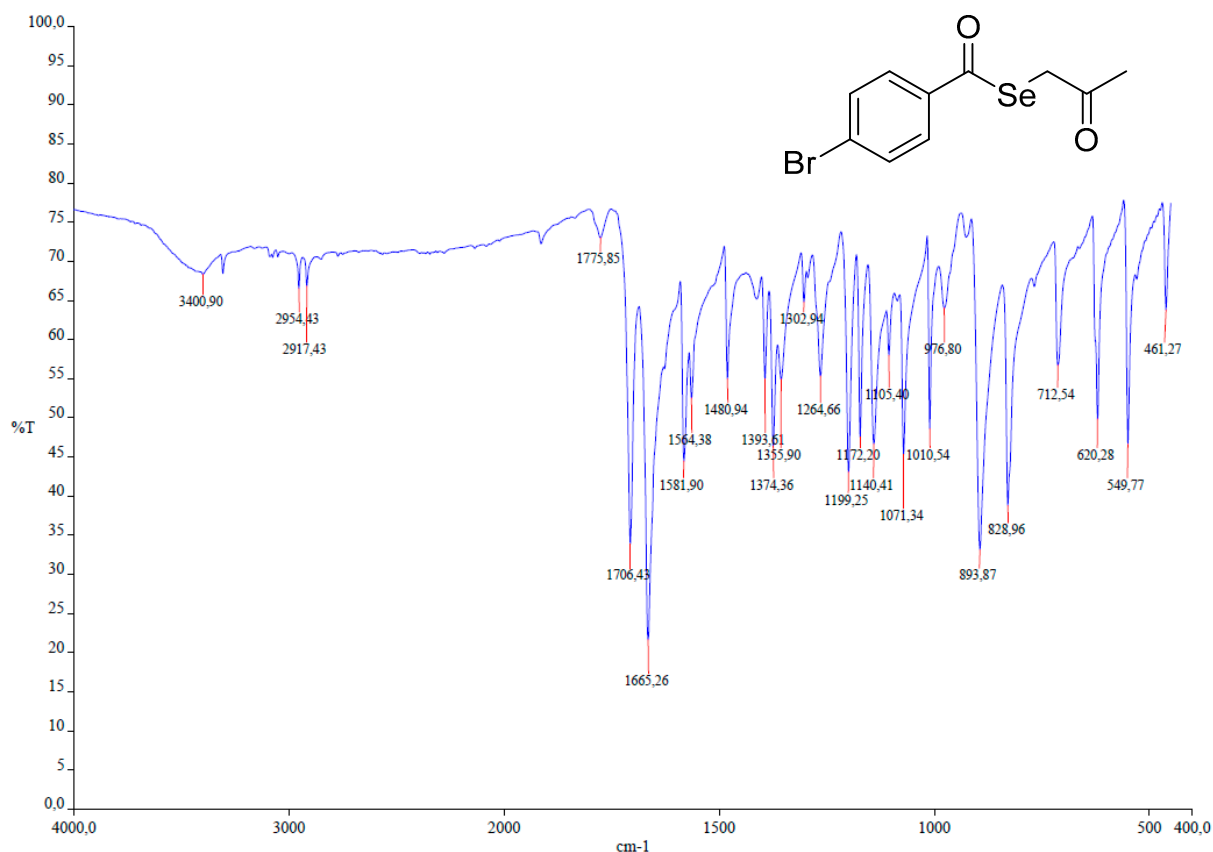

Figure S3. Compound K3: Se-(2-oxopropyl) 4-bromobenzoselenoate. S3A. IR spectrum (KBr) of K3.

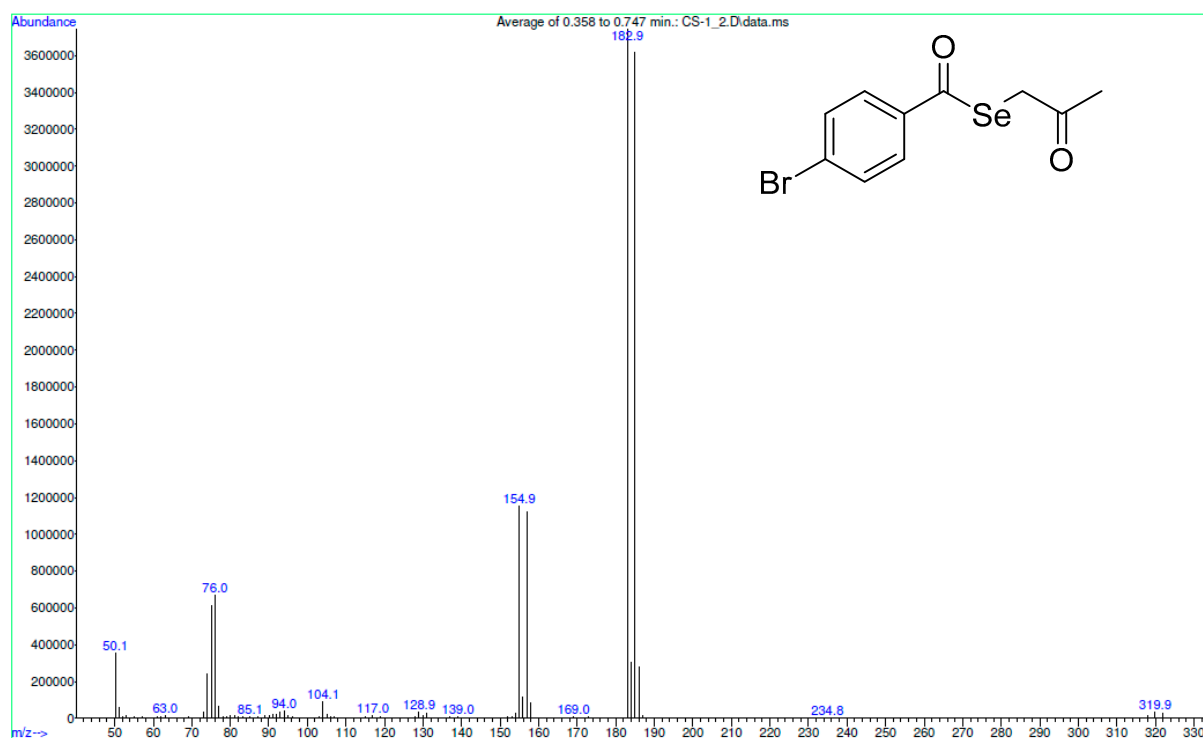

Figure S3B. DIP-MS spectrum of K3.

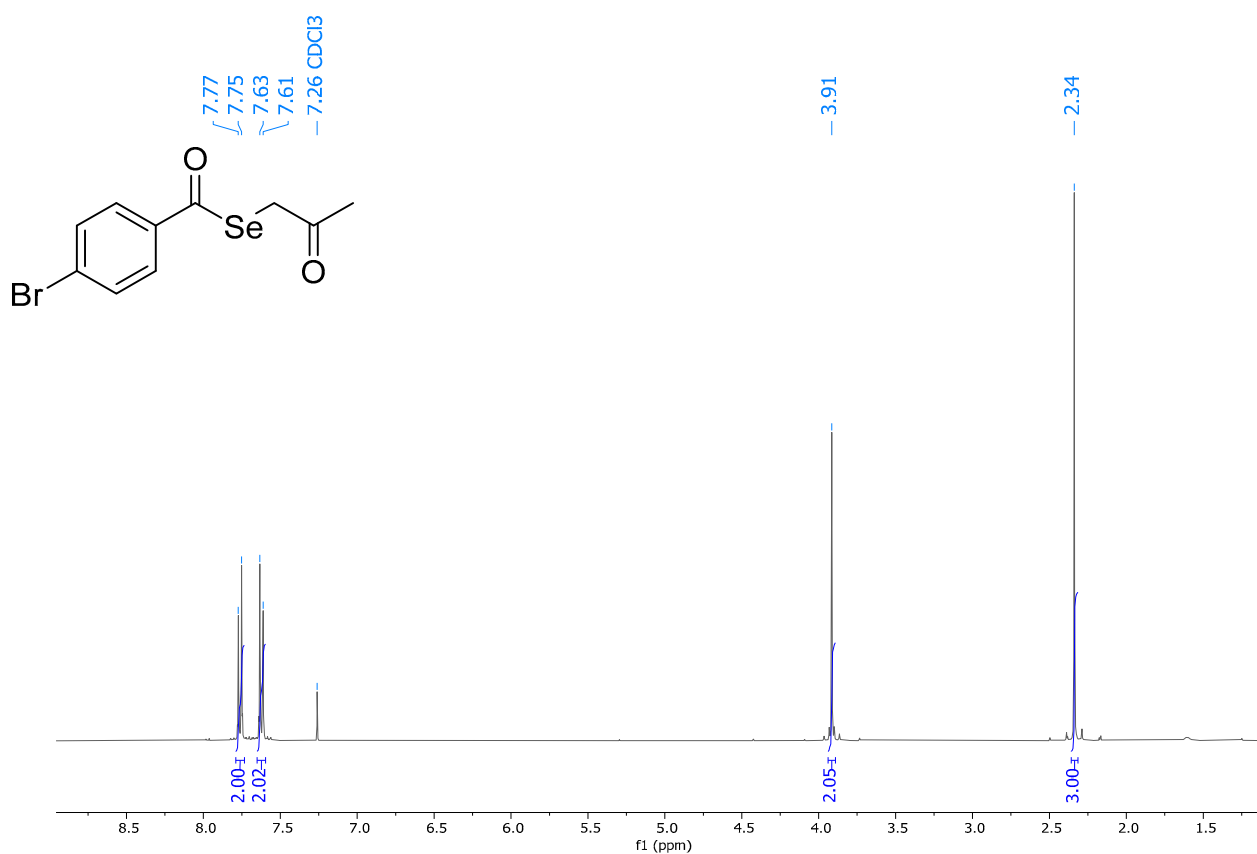

Figure S3C. <sup>1</sup>H-NMR spectrum (CDCl<sub>3</sub>, 400 MHz) of K3.

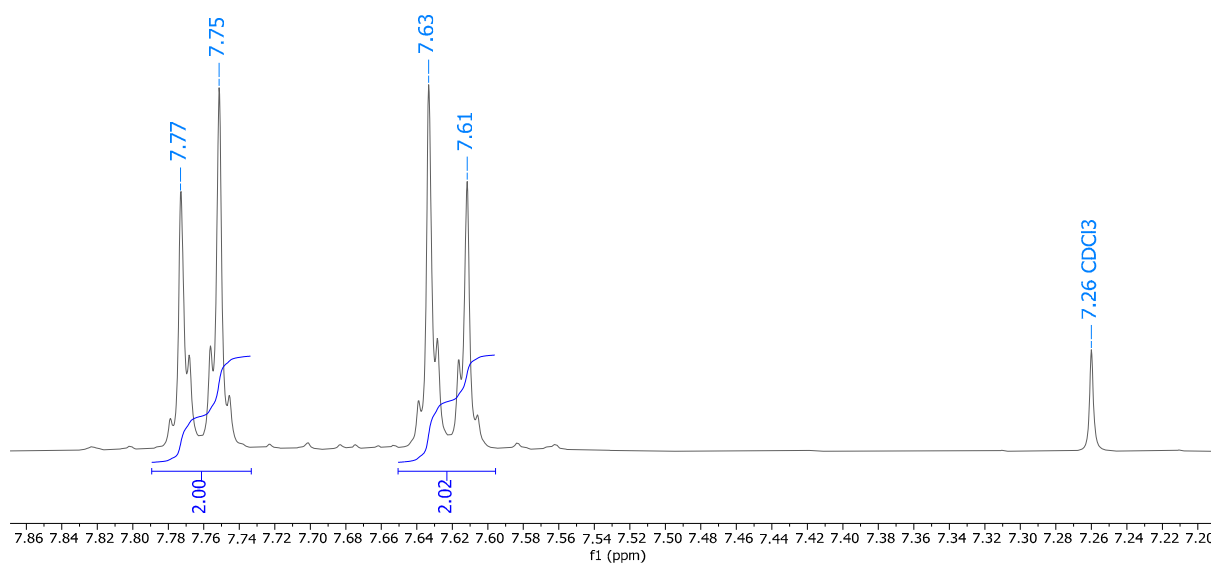

Figure S3D. <sup>1</sup>H-NMR spectrum (CDCl<sub>3</sub>, 400 MHz) of K3 (aromatics).

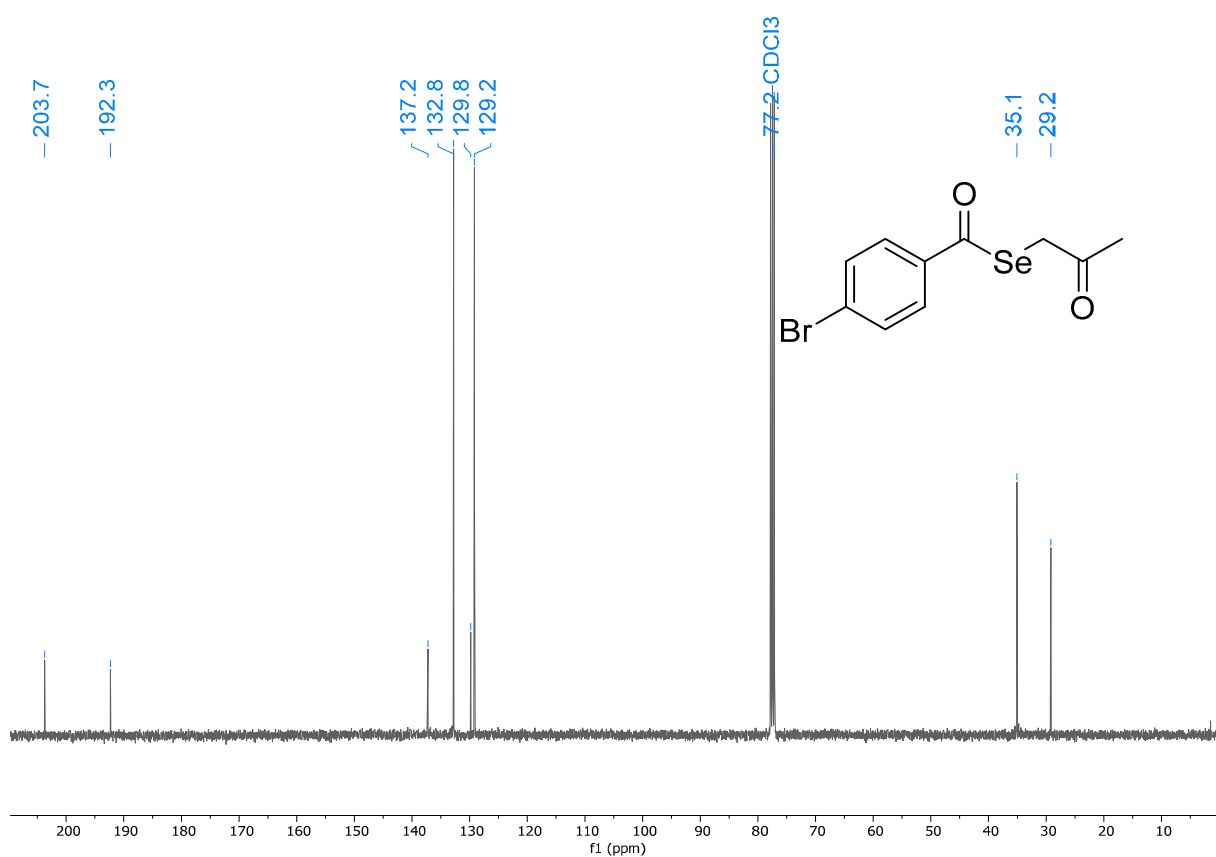

Figure S3E. <sup>13</sup>C-NMR spectrum (CDCl<sub>3</sub>, 101 MHz) of K3.

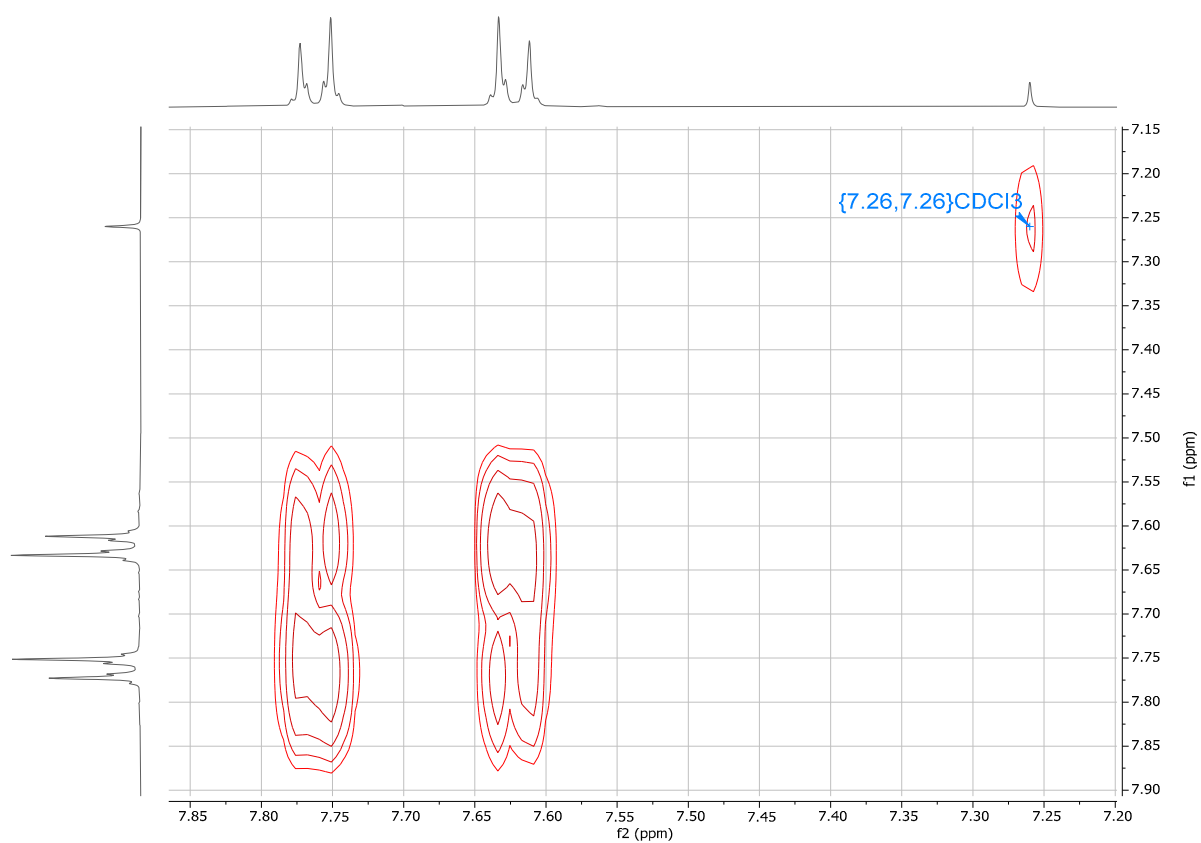

Figure S3F. <sup>1</sup>H-<sup>1</sup>H COSY NMR spectrum (CDCl<sub>3</sub>) of K3 (aromatics).

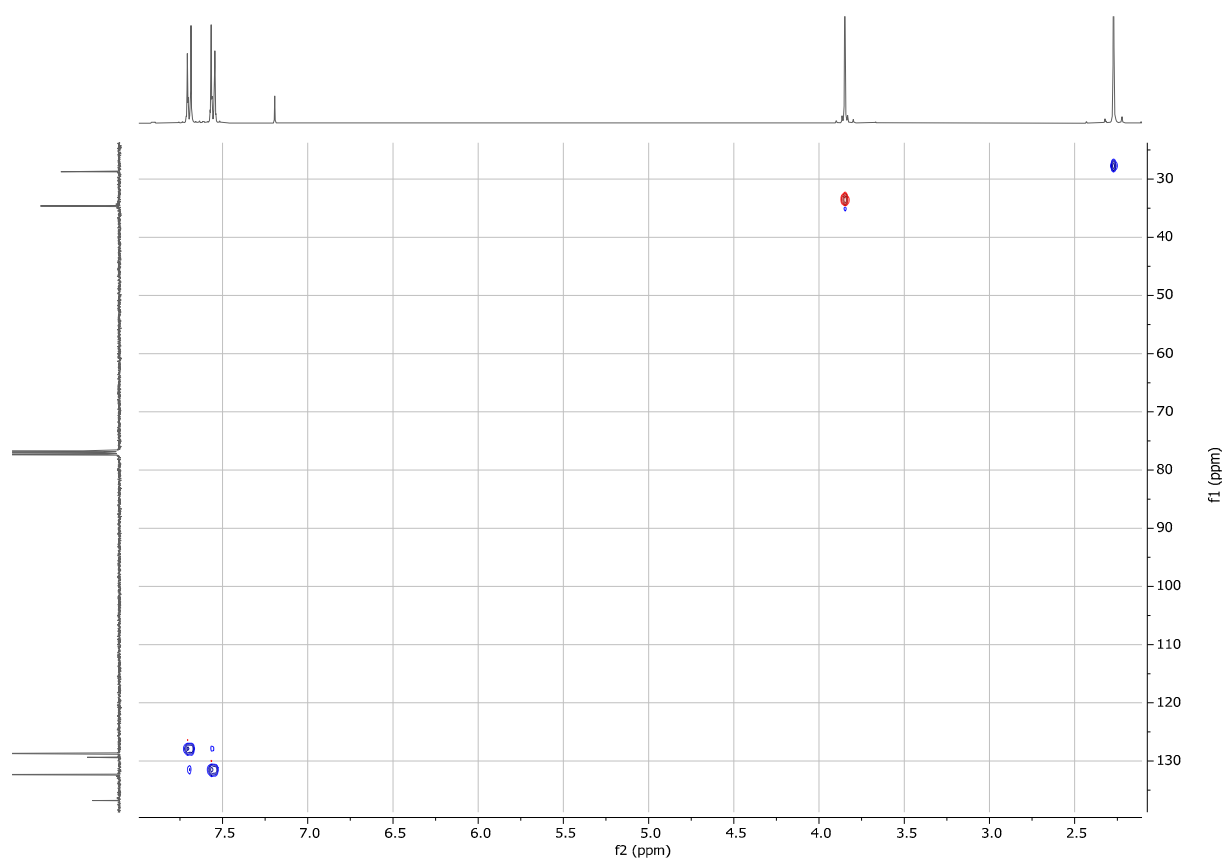

**Figure S3G.**  $^1\text{H}$ - $^{13}\text{C}$  HSQC NMR spectrum ( $\text{CDCl}_3$ ) of **K3**.

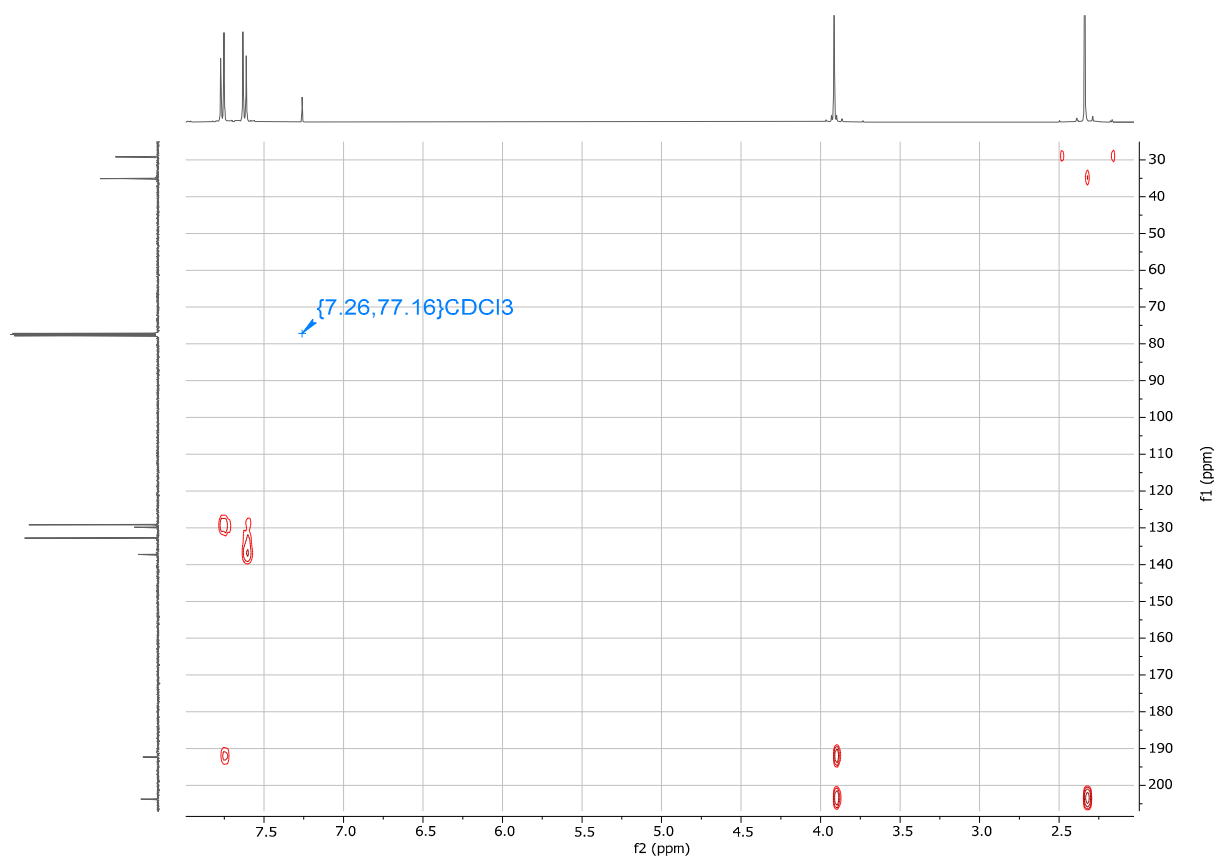

**Figure S3H.**  $^1\text{H}$ - $^{13}\text{C}$  HMBC NMR spectrum ( $\text{CDCl}_3$ ) of **K3**.

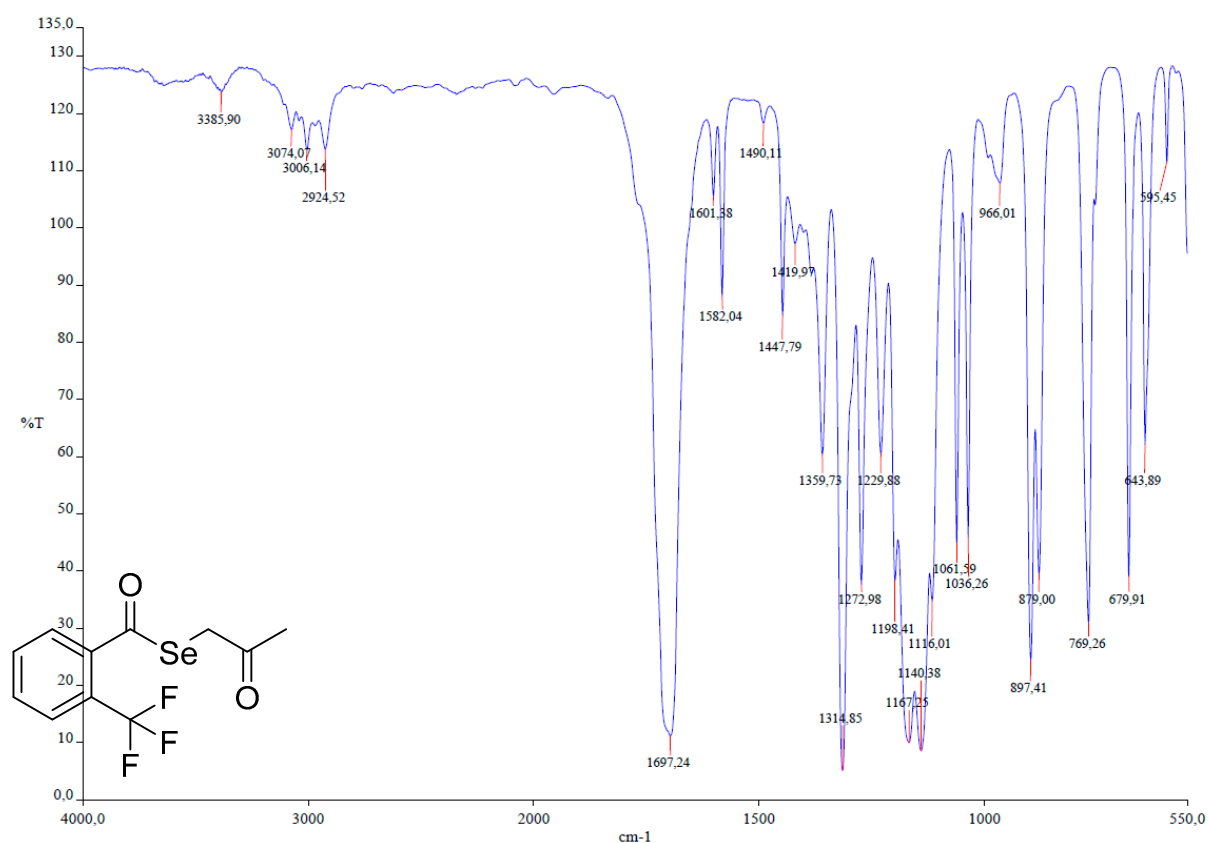

Figure S4. Compound K4: Se-(2-oxopropyl) 2-(trifluoromethyl)benzoselenoate. S4A. IR spectrum (NaCl) of K4.

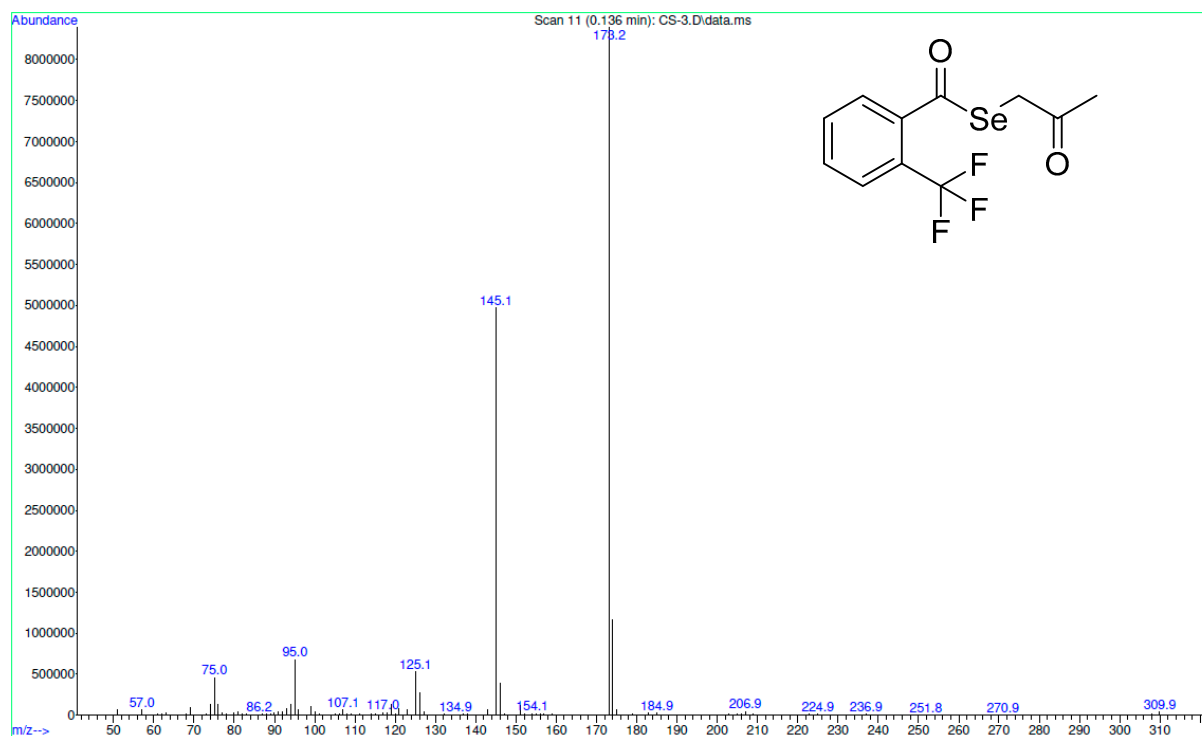

Figure S4B. DIP-MS spectrum of K4.

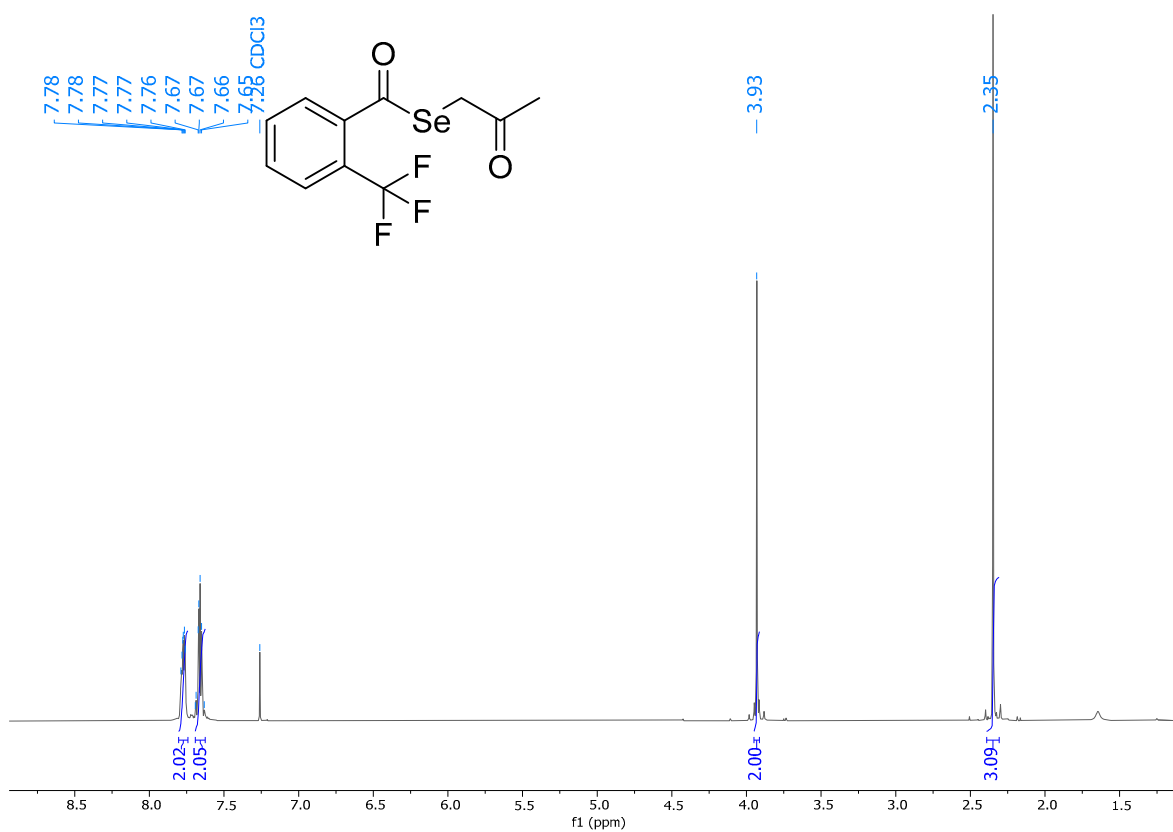

Figure S4C. <sup>1</sup>H-NMR spectrum (CDCl<sub>3</sub>, 400 MHz) of K4.

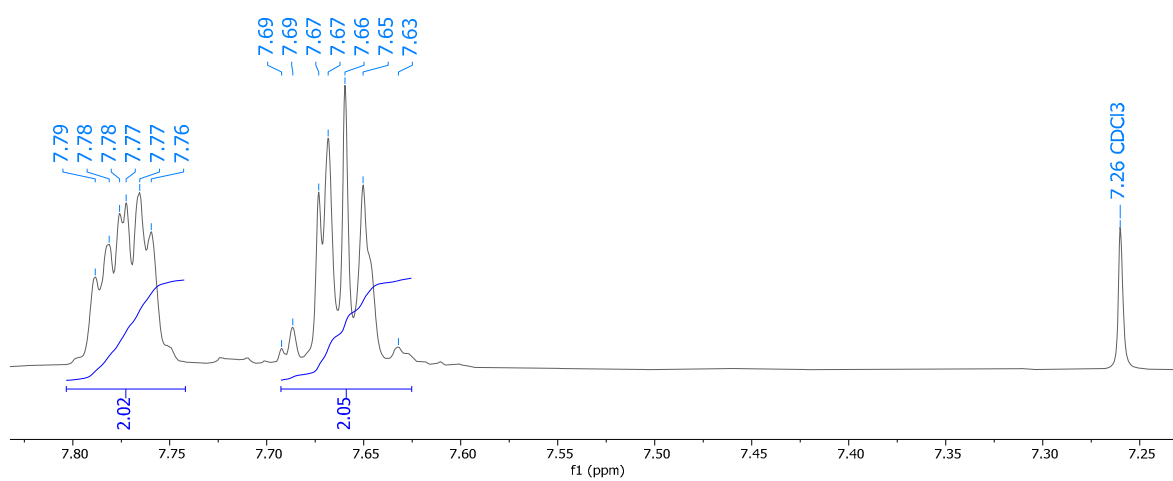

Figure S4D. <sup>1</sup>H-NMR spectrum (CDCl<sub>3</sub>, 400 MHz) of K4 (aromatics).

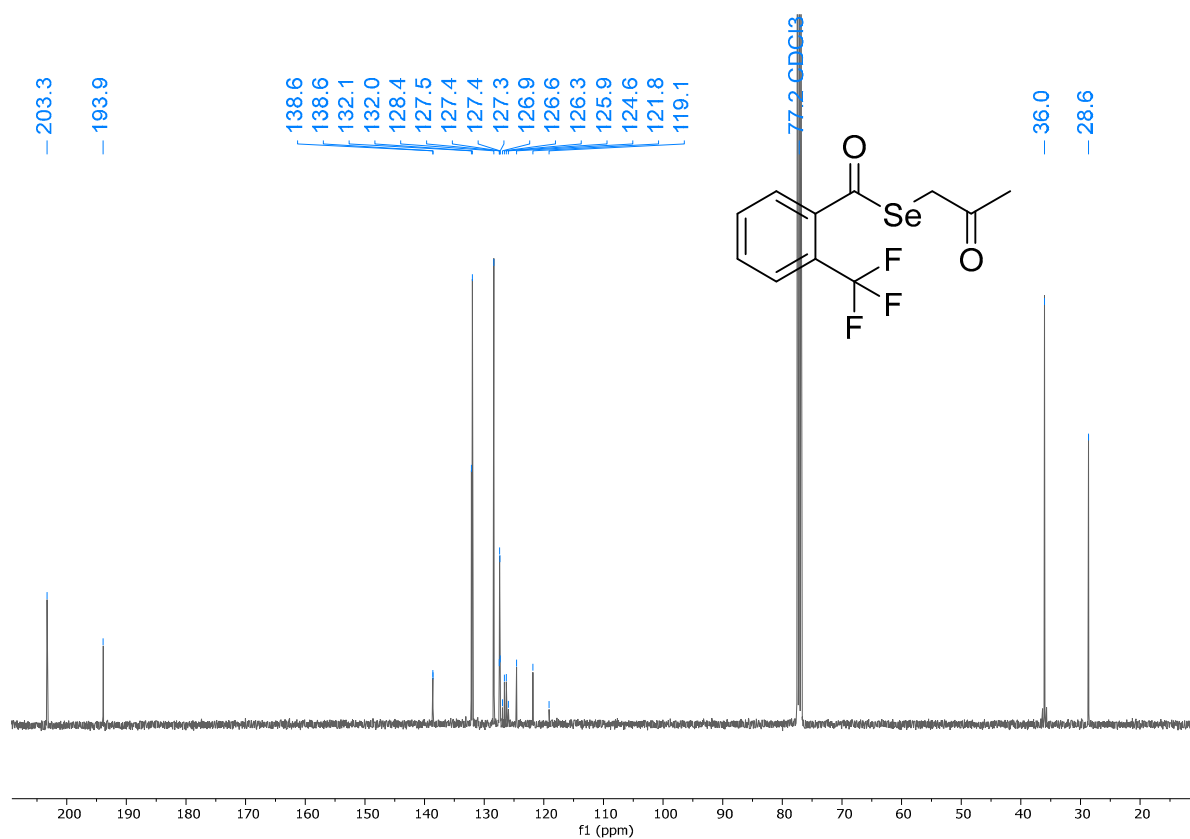Figure S4E. <sup>13</sup>C-NMR spectrum (CDCl<sub>3</sub>, 101 MHz) of K4.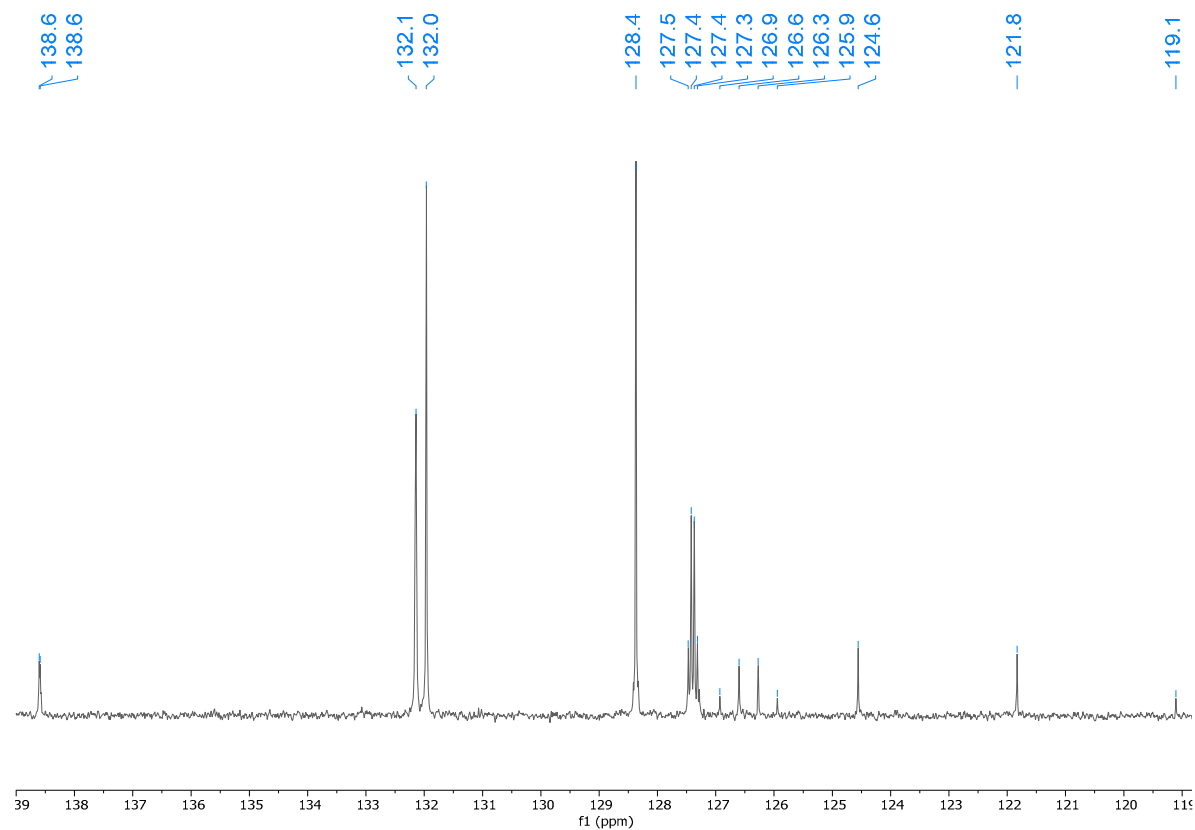Figure S4F. <sup>13</sup>C-NMR spectrum (CDCl<sub>3</sub>, 101 MHz) of K4 (aromatics).

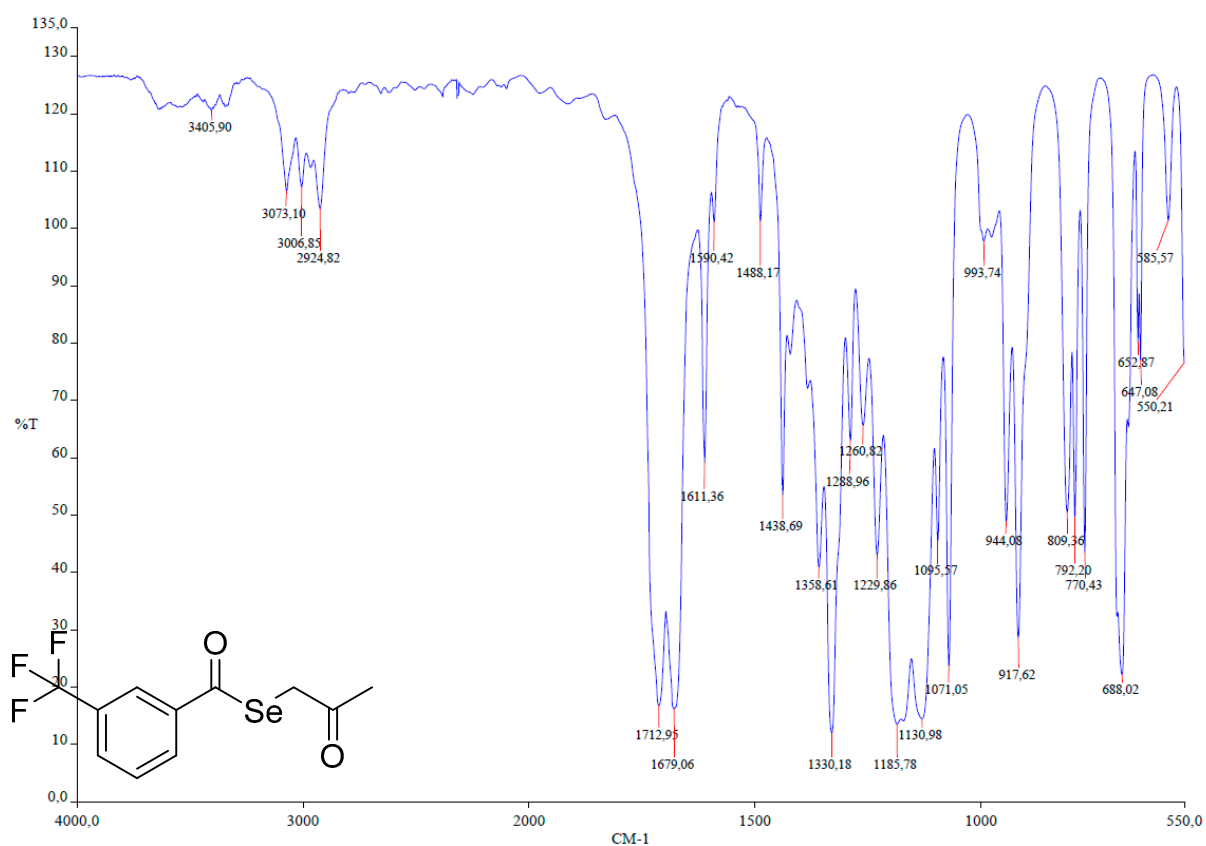

Figure S5. Compound K5: Se-(2-oxopropyl) 3-(trifluoromethyl)benzoselenoate. S5A. IR spectrum (NaCl) of K5.

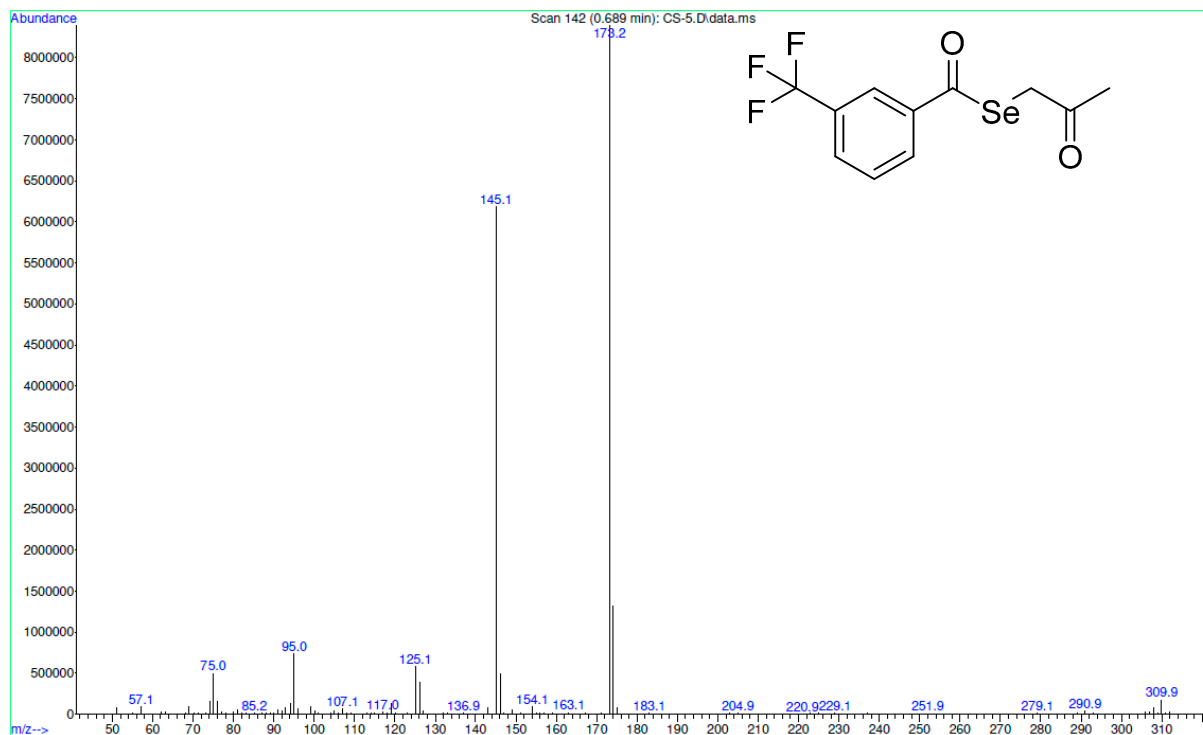

Figure S5B. DIP-MS spectrum of K5.



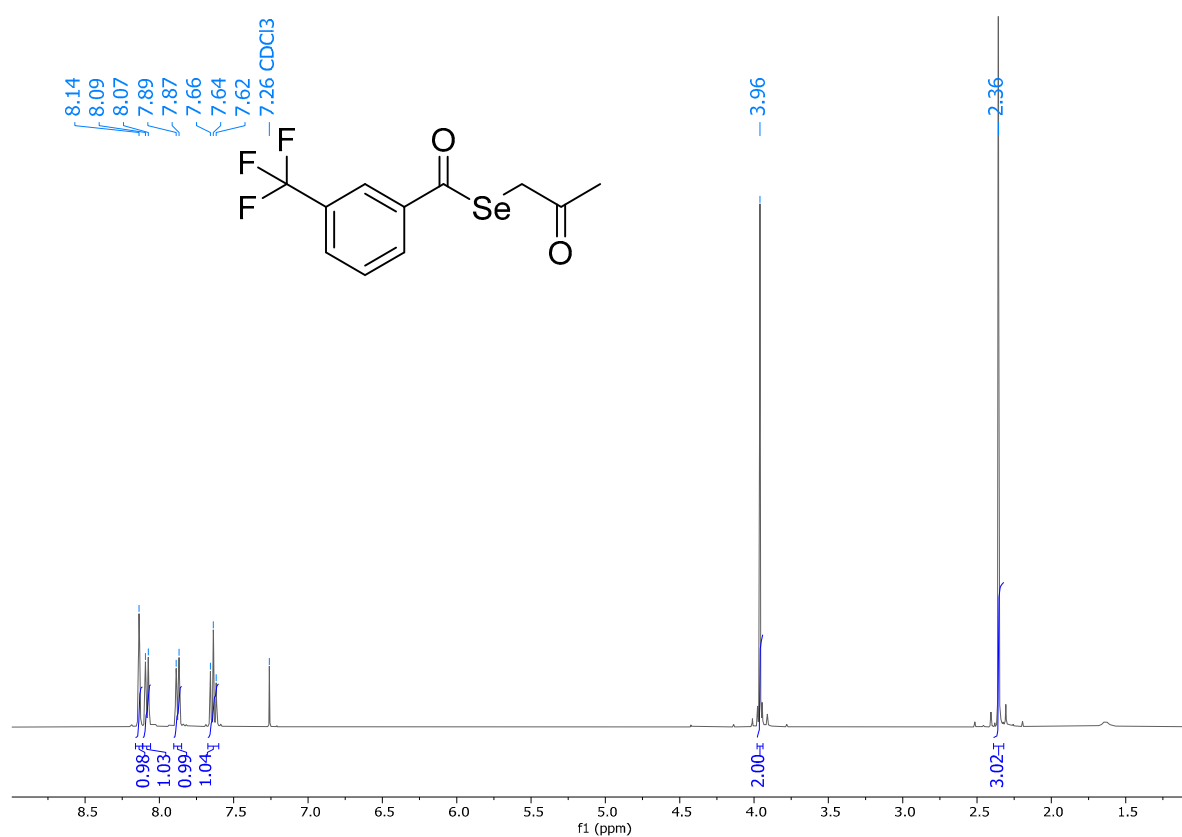

Figure S5C. <sup>1</sup>H-NMR spectrum (CDCl<sub>3</sub>, 400 MHz) of K5.

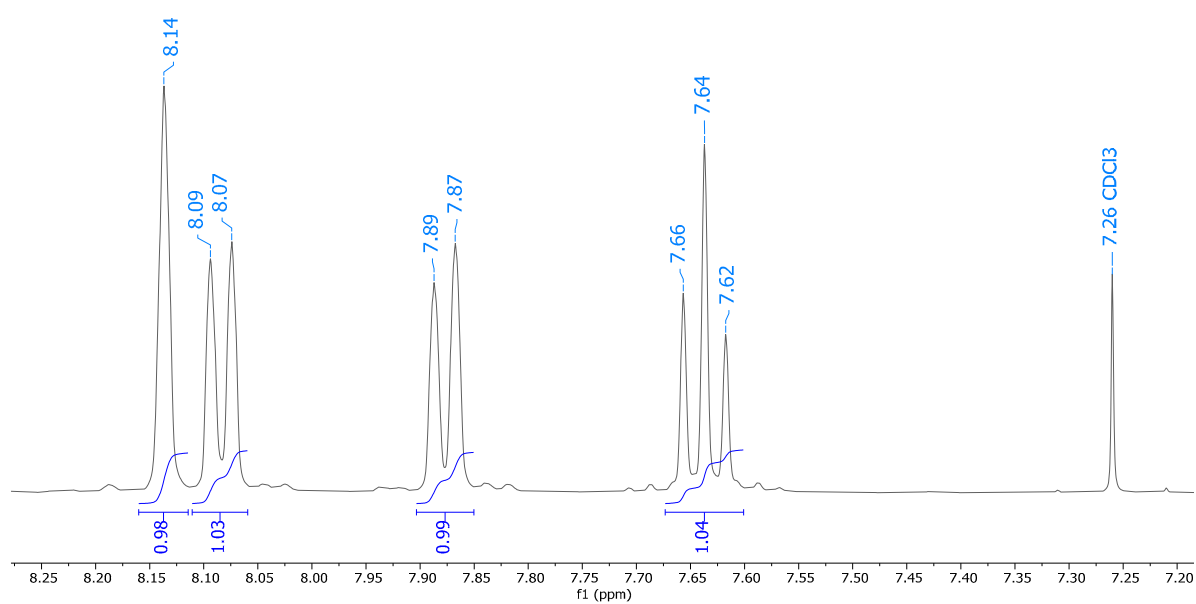

Figure S5D. <sup>1</sup>H-NMR spectrum (CDCl<sub>3</sub>, 400 MHz) of K5 (aromatics).

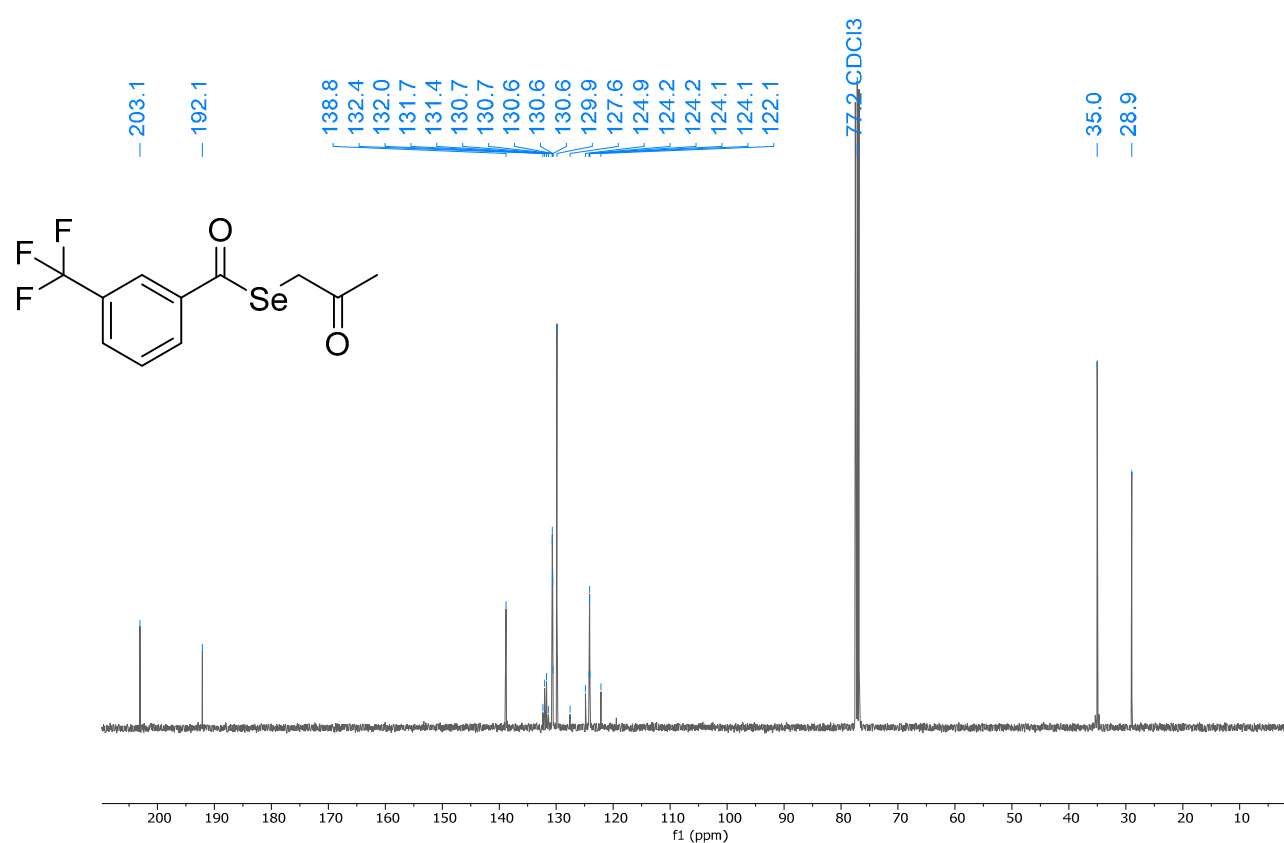

Figure S5E. <sup>13</sup>C-NMR spectrum (CDCl<sub>3</sub>, 101 MHz) of K5.

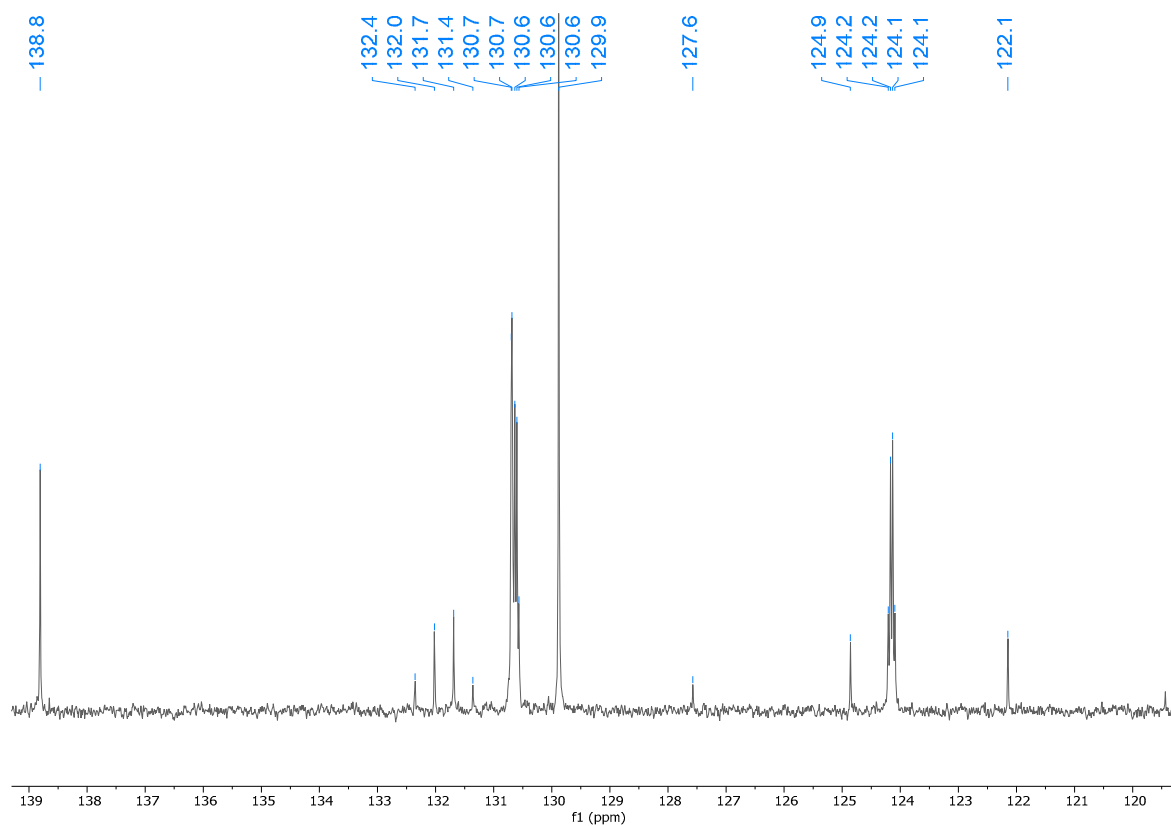

Figure S5F. <sup>13</sup>C-NMR spectrum (CDCl<sub>3</sub>, 101 MHz) of K5 (aromatics).

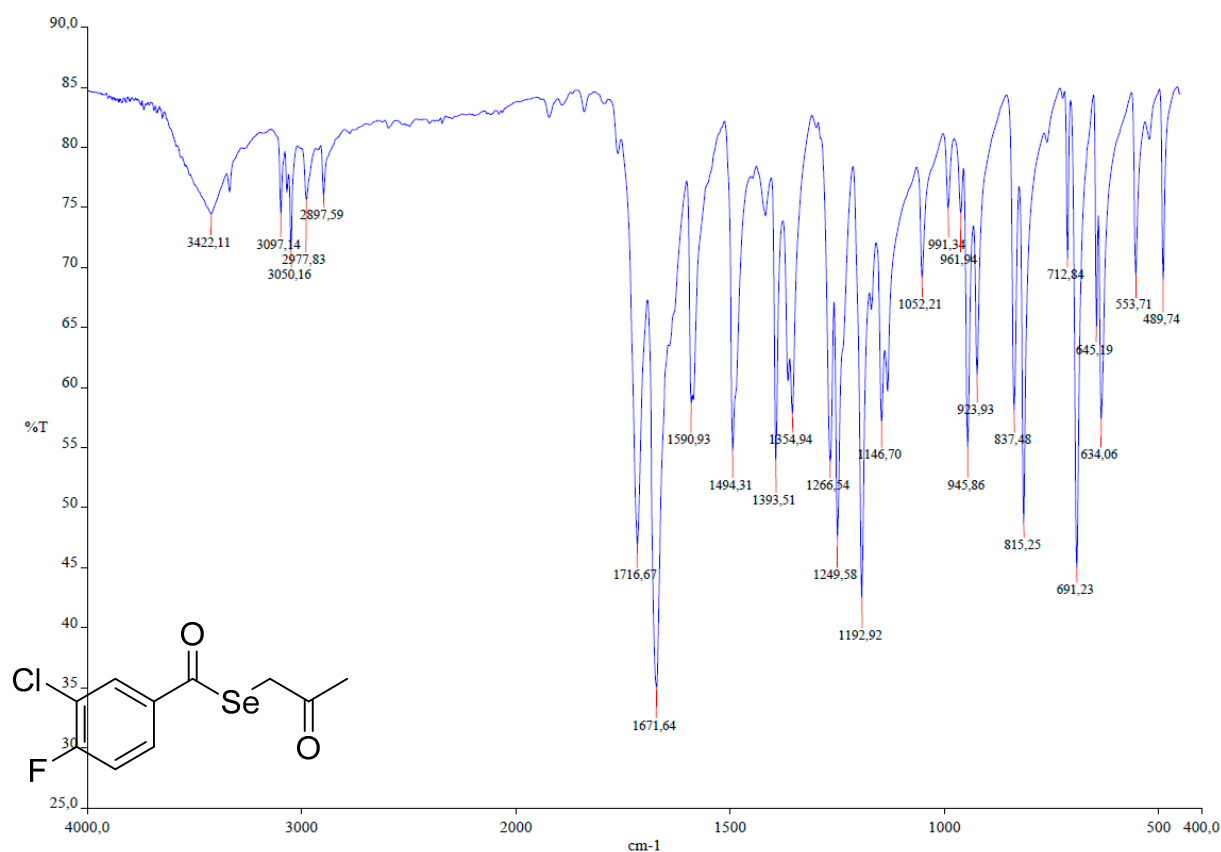

Figure S6. Compound K6: Se-(2-oxopropyl) 3-chloro-4-fluorobenzoselenoate. S6A. IR spectrum (KBr) of K6.

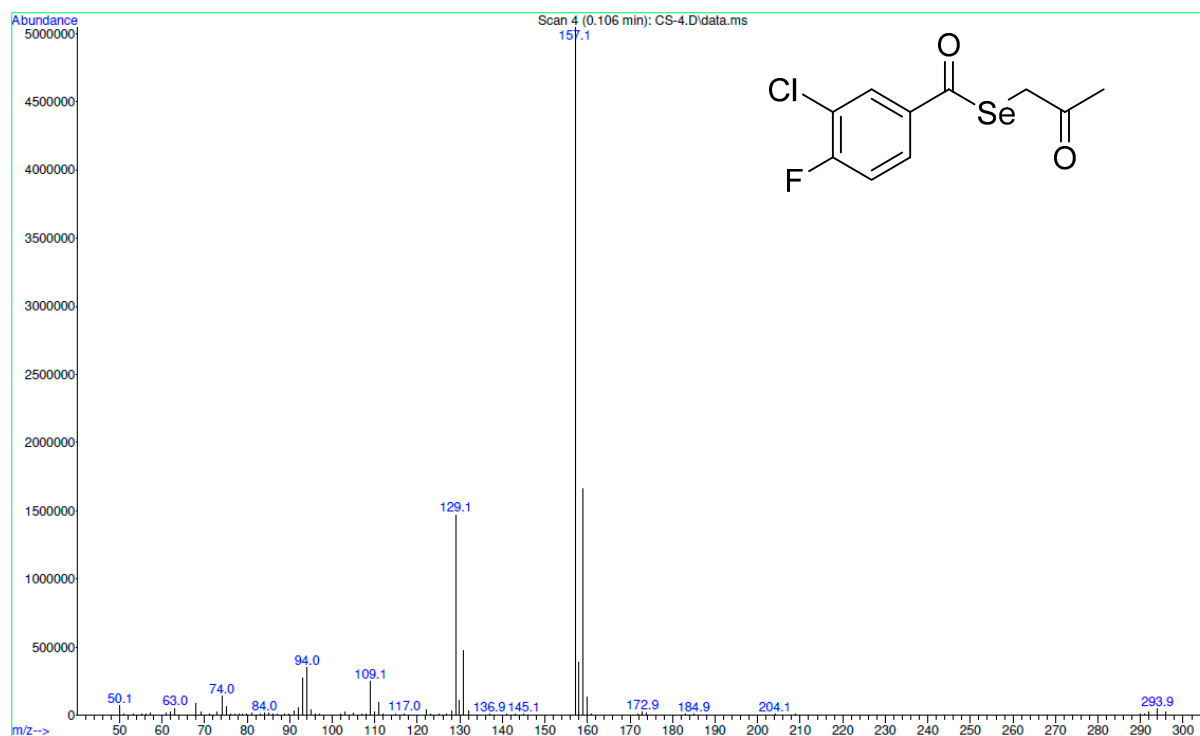

Figure S6B. DIP-MS spectrum of K6.

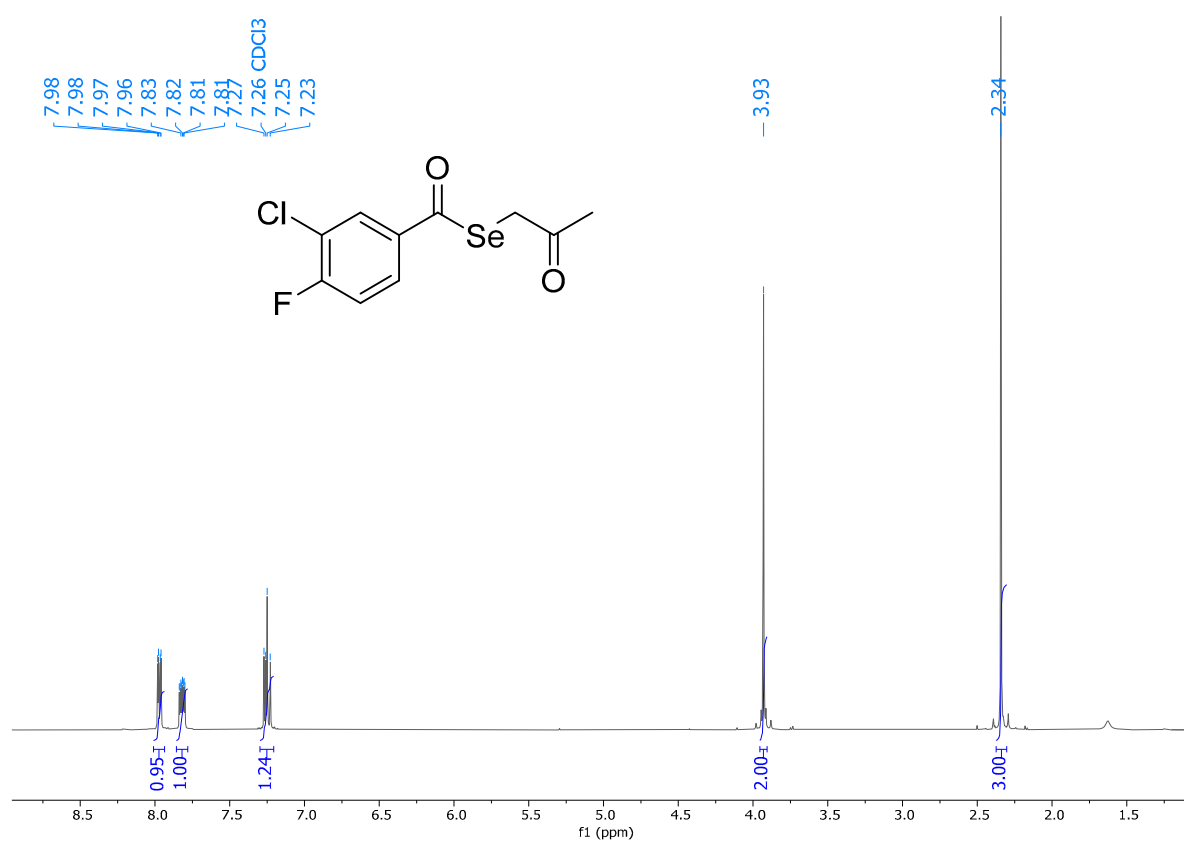

Figure S6C. <sup>1</sup>H-NMR spectrum (CDCl<sub>3</sub>, 400 MHz) of K6.

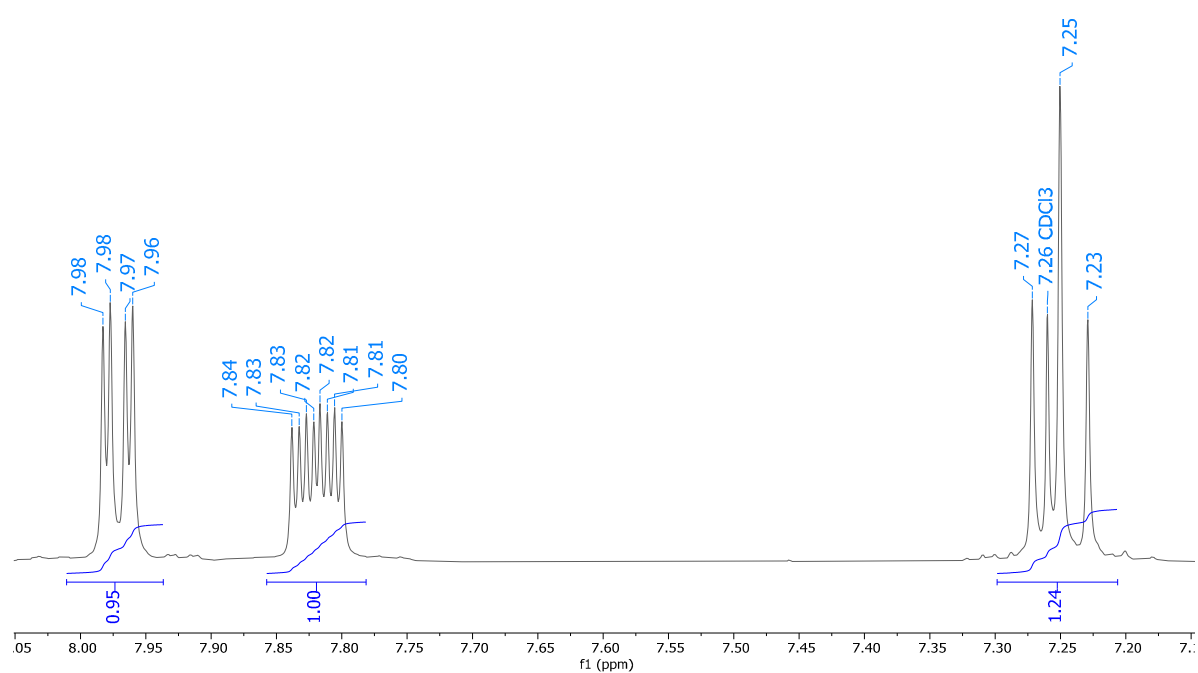

Figure S6D. <sup>1</sup>H-NMR spectrum (CDCl<sub>3</sub>, 400 MHz) of K6 (aromatics).

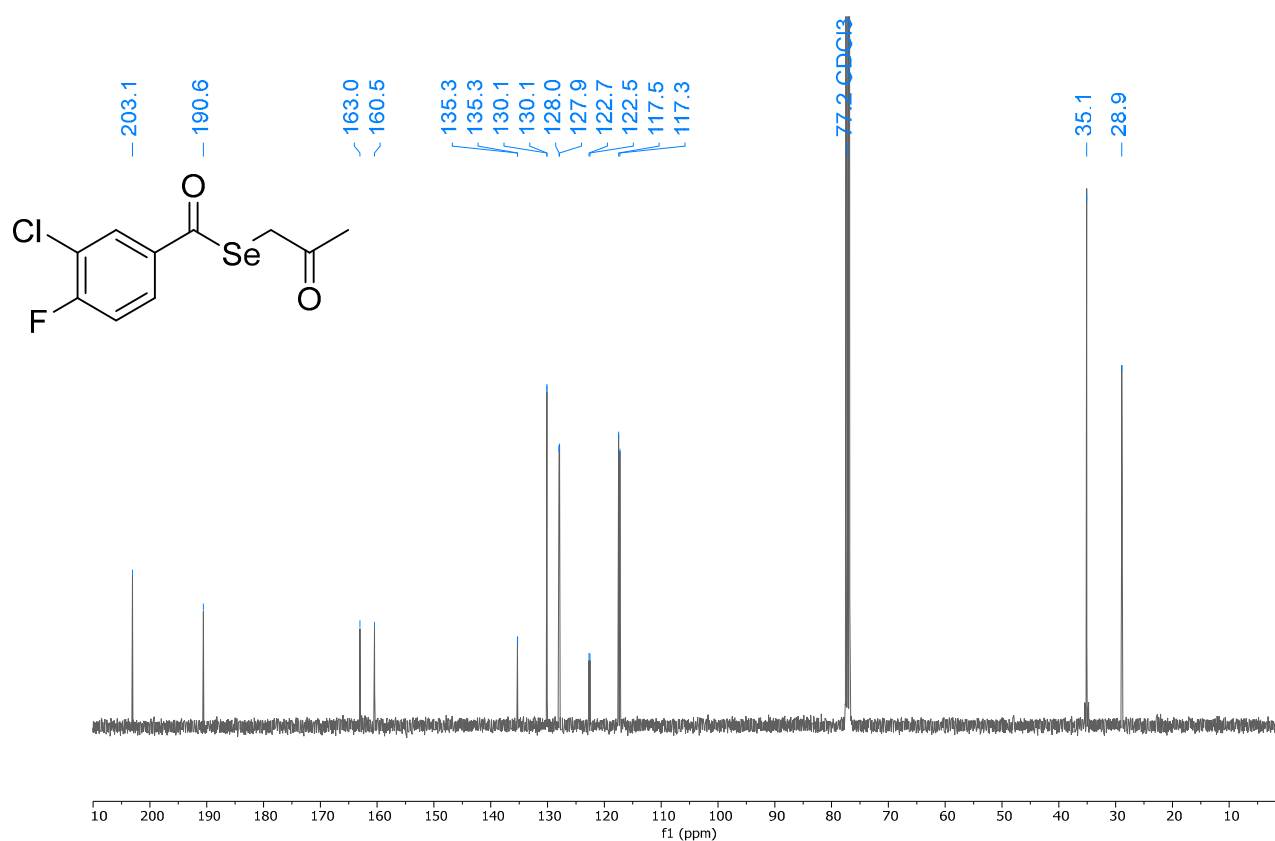Figure S6E. <sup>13</sup>C-NMR spectrum (CDCl<sub>3</sub>, 101 MHz) of K6.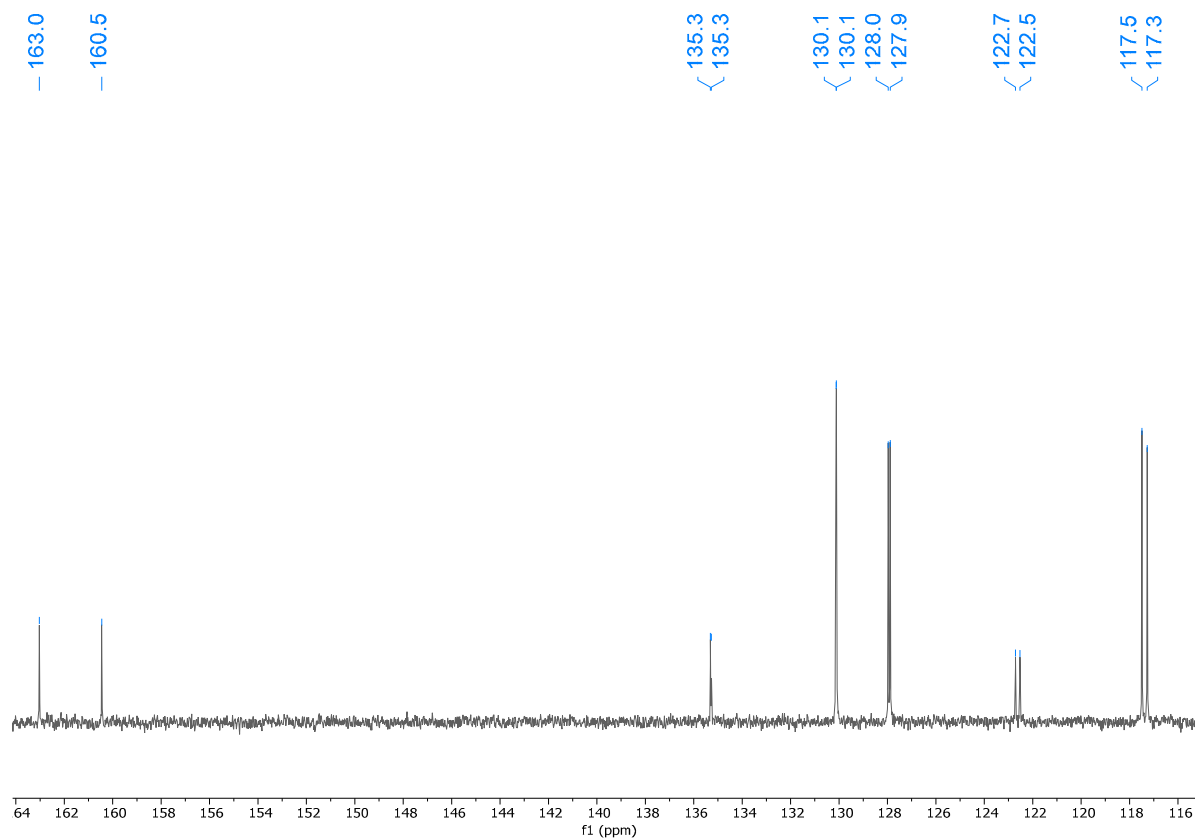Figure S6F. <sup>13</sup>C-NMR spectrum (CDCl<sub>3</sub>, 101 MHz) of K6 (aromatics).

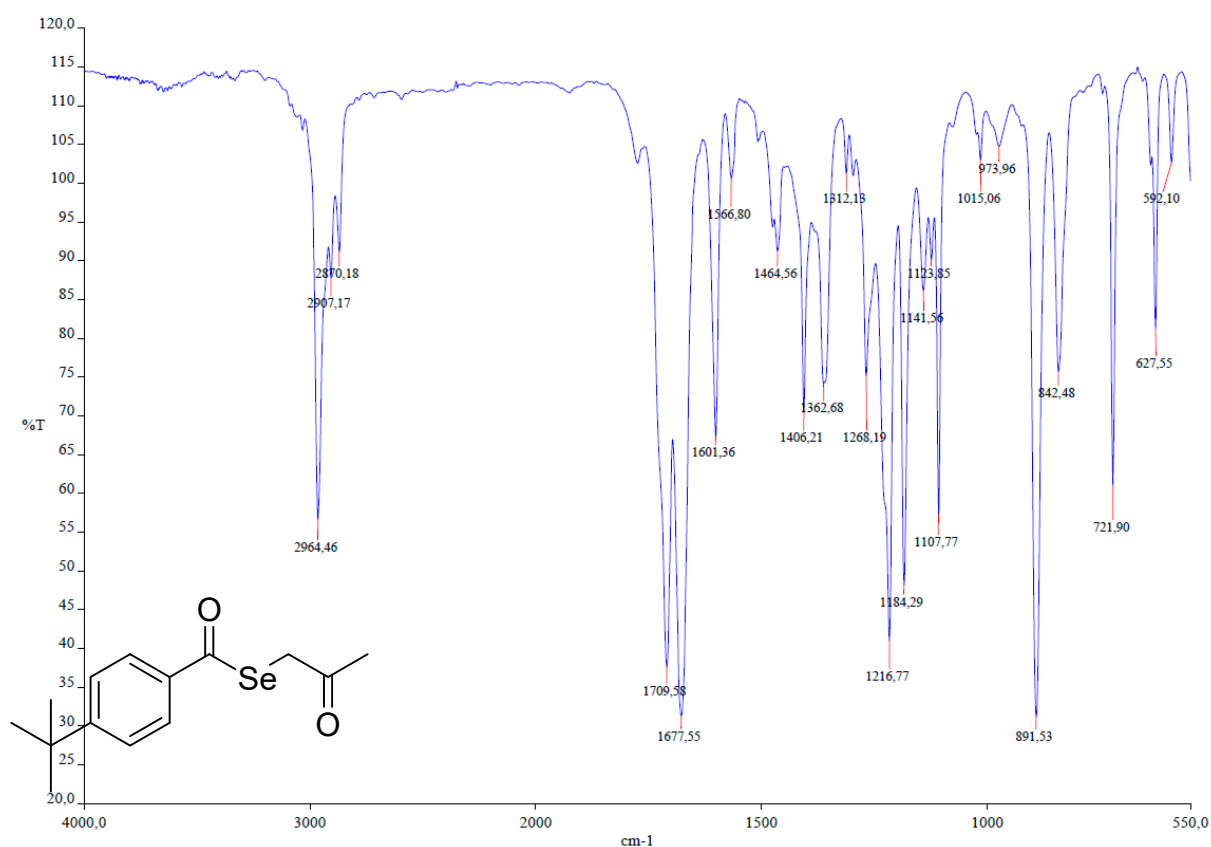

Figure S7. Compound K7: Se-(2-oxopropyl) 4-(tert-butyl)benzoselenoate. S7A. IR spectrum (NaCl) of K7.

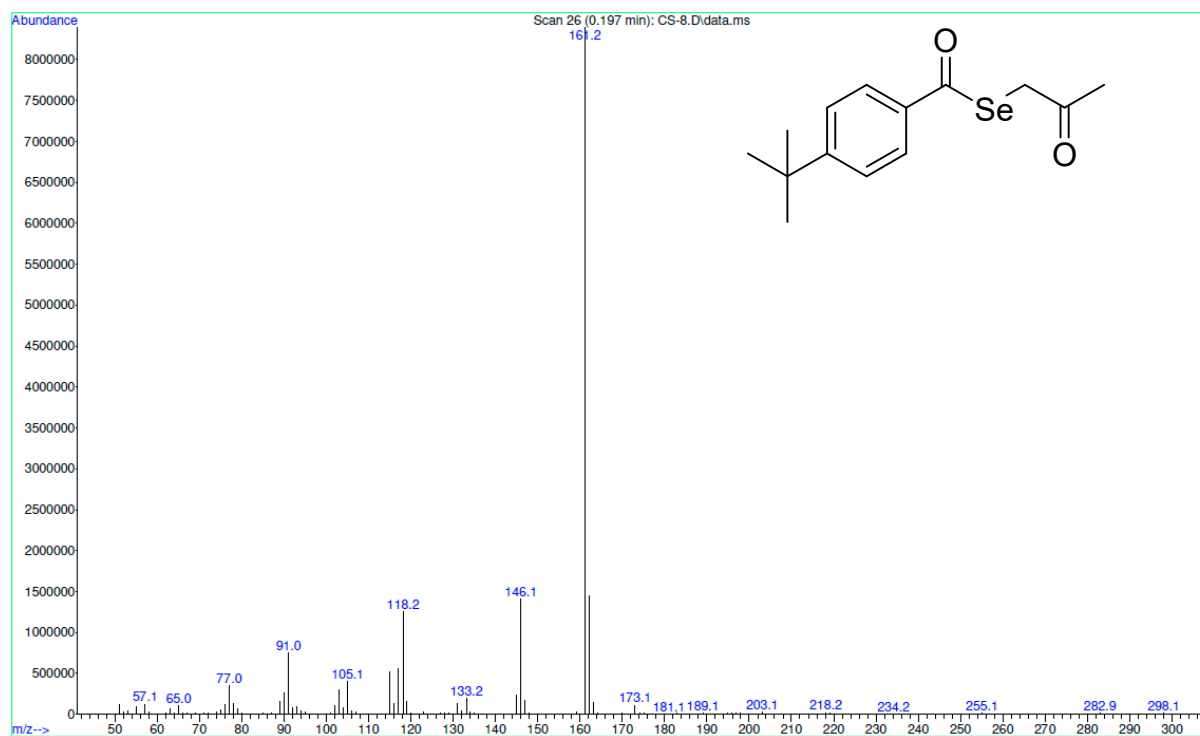

Figure S7B. DIP-MS spectrum of K7.

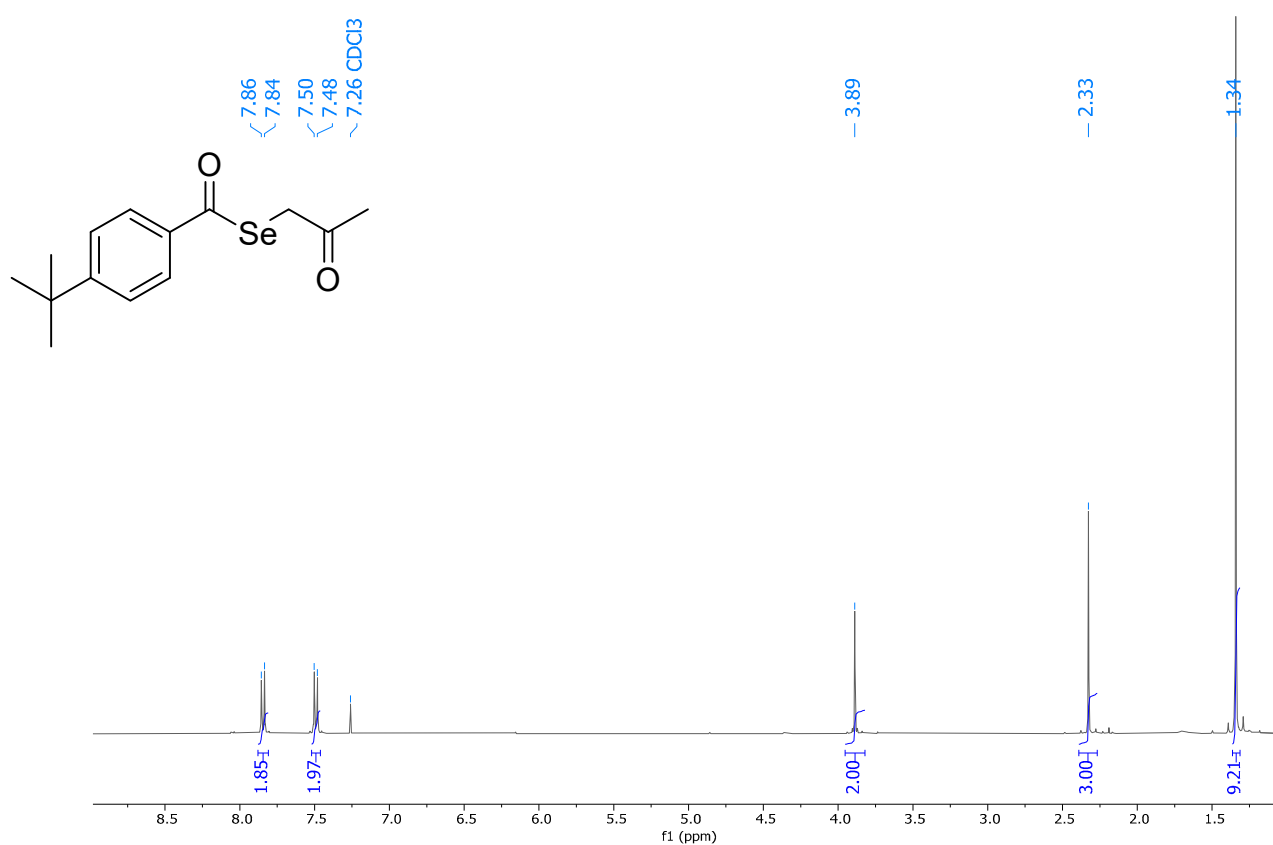

Figure S7C. <sup>1</sup>H-NMR spectrum (CDCl<sub>3</sub>, 400 MHz) of K7.

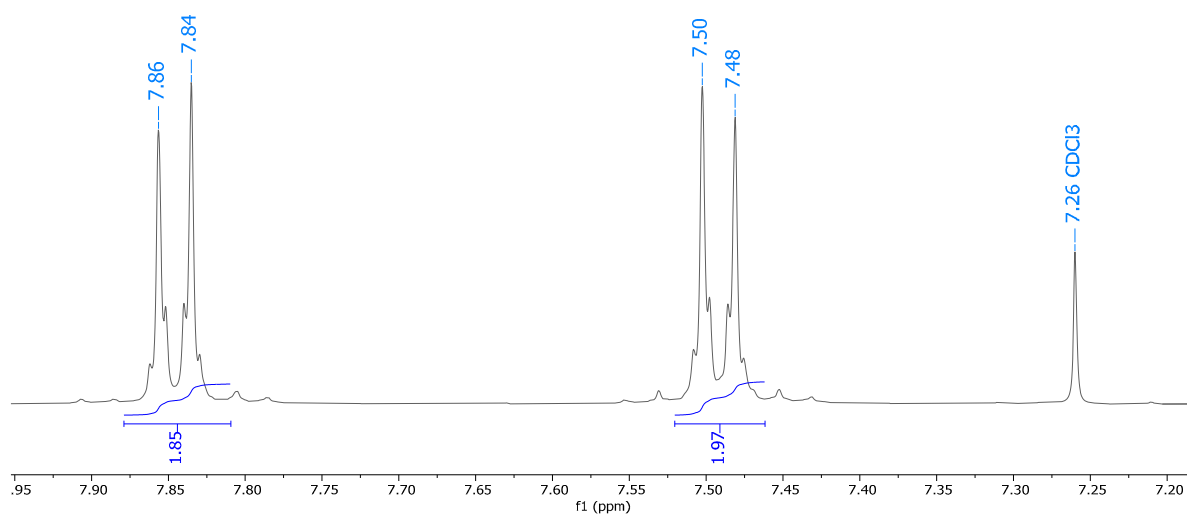

Figure S7D. <sup>1</sup>H-NMR spectrum (CDCl<sub>3</sub>, 400 MHz) of K7 (aromatics).

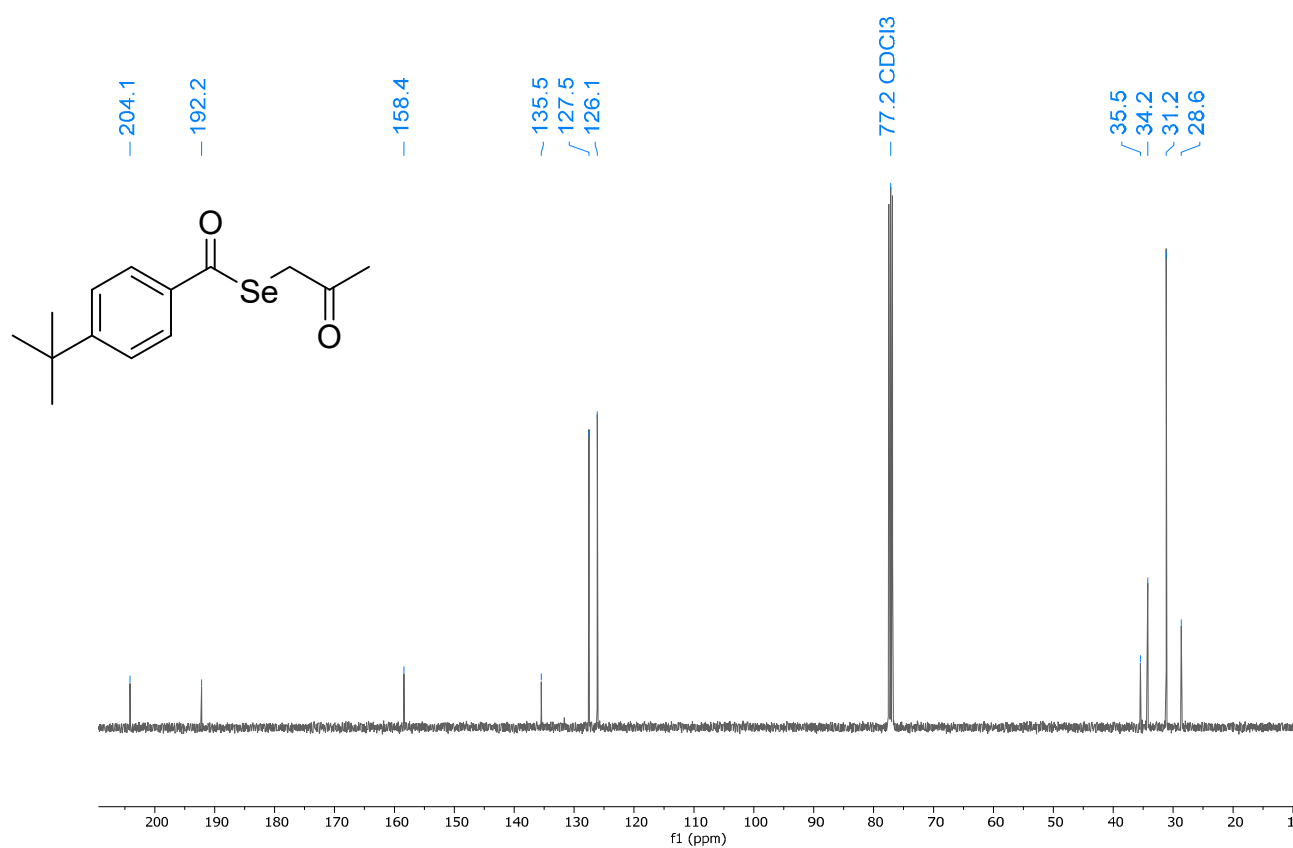

Figure S7E. <sup>13</sup>C-NMR spectrum (CDCl<sub>3</sub>, 101 MHz) of K7.

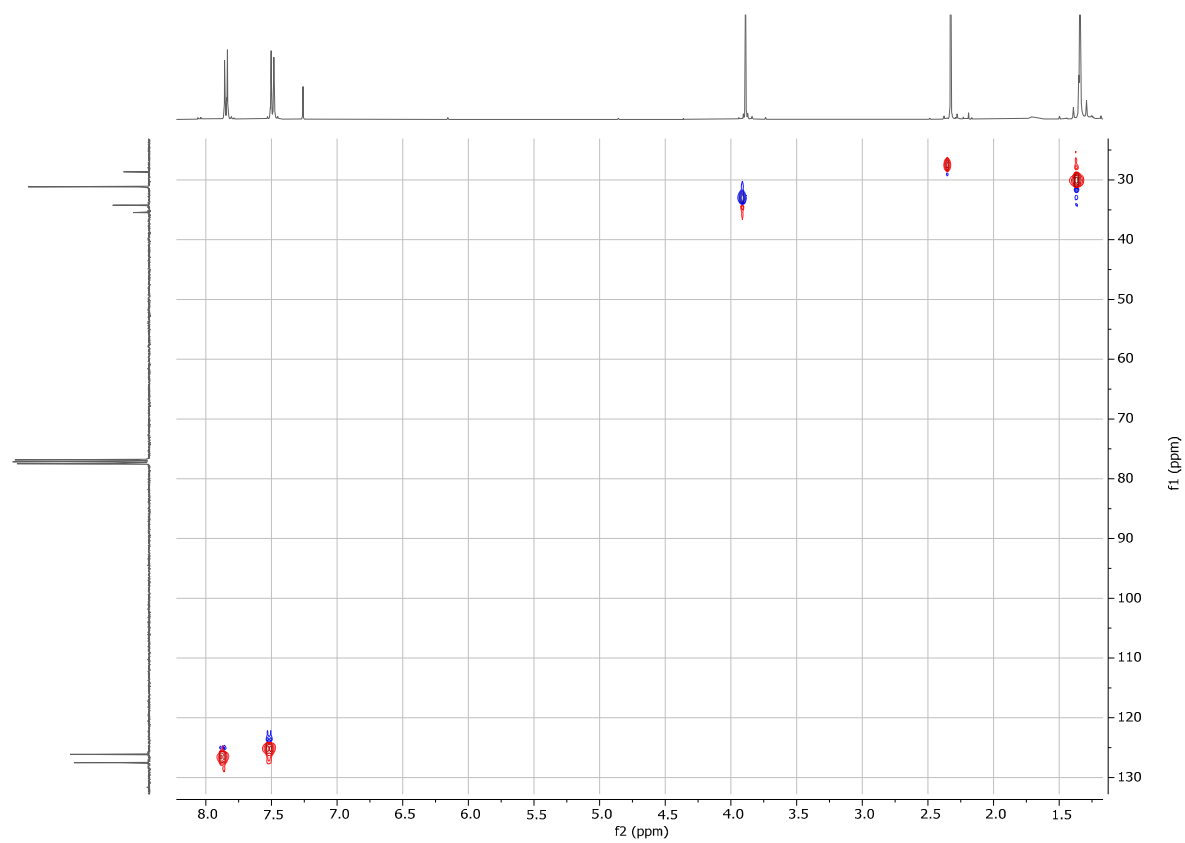

Figure S7F. <sup>1</sup>H-<sup>13</sup>C HSQC NMR spectrum (CDCl<sub>3</sub>) of K7.



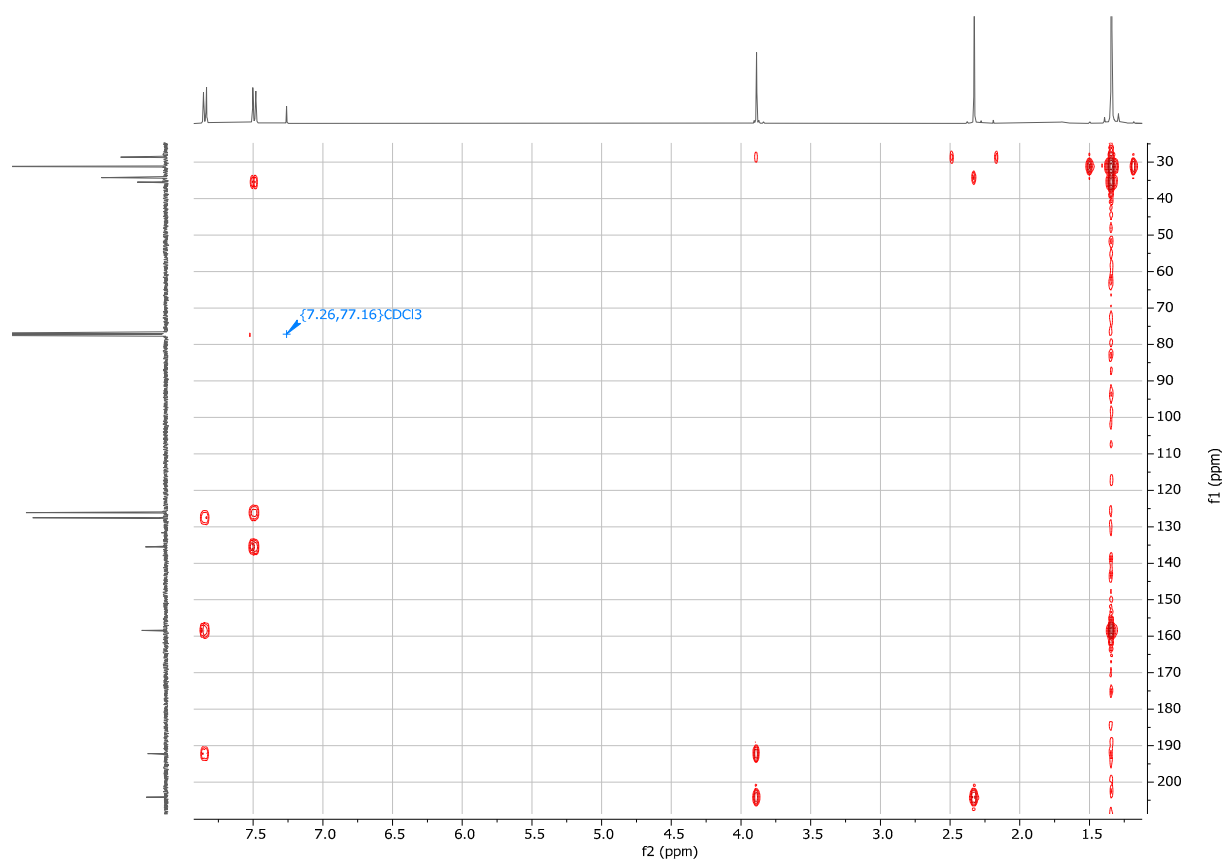

**Figure S7G.**  $^1\text{H}$ - $^{13}\text{C}$  HMBC NMR spectrum ( $\text{CDCl}_3$ ) of K7.

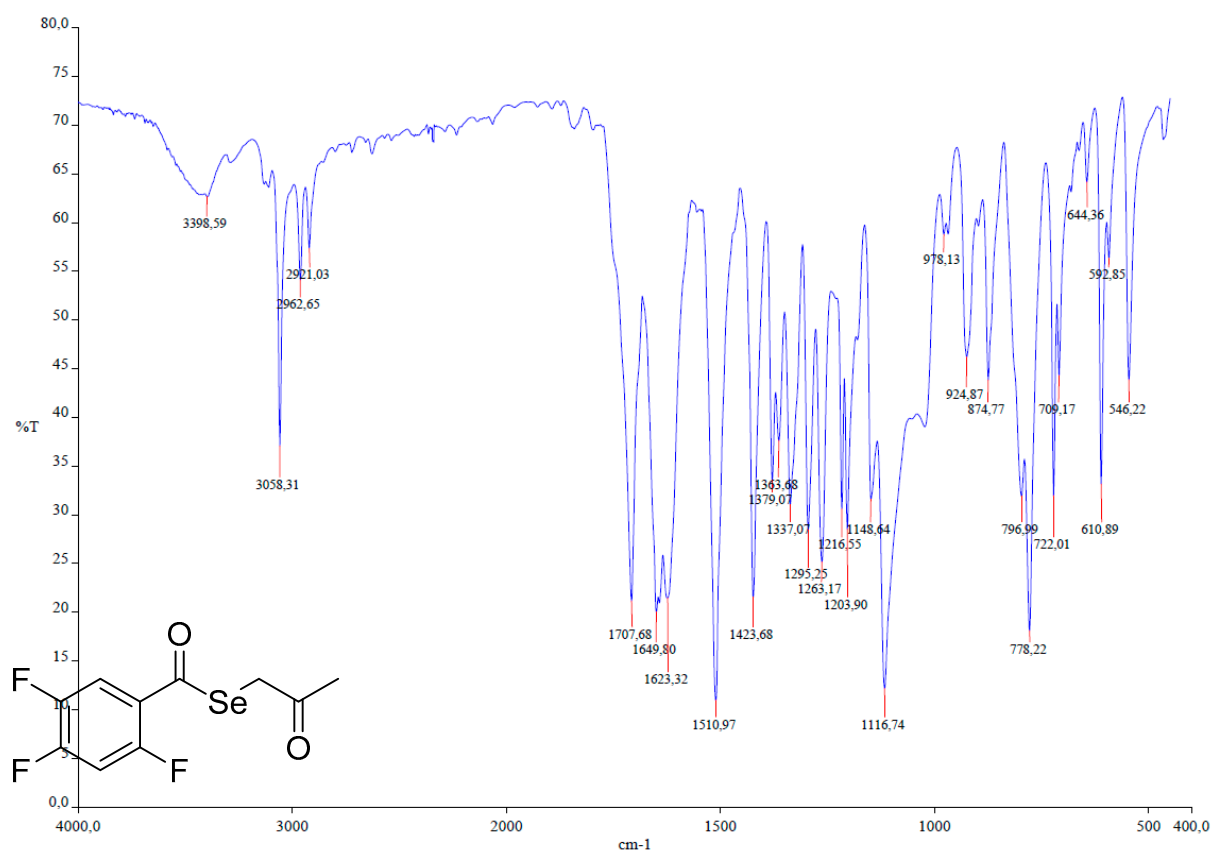

Figure S8. Compound K8: Se-(2-oxopropyl) 2,4,5-trifluorobenzoselenoate. S8A. IR spectrum (KBr) of K8.

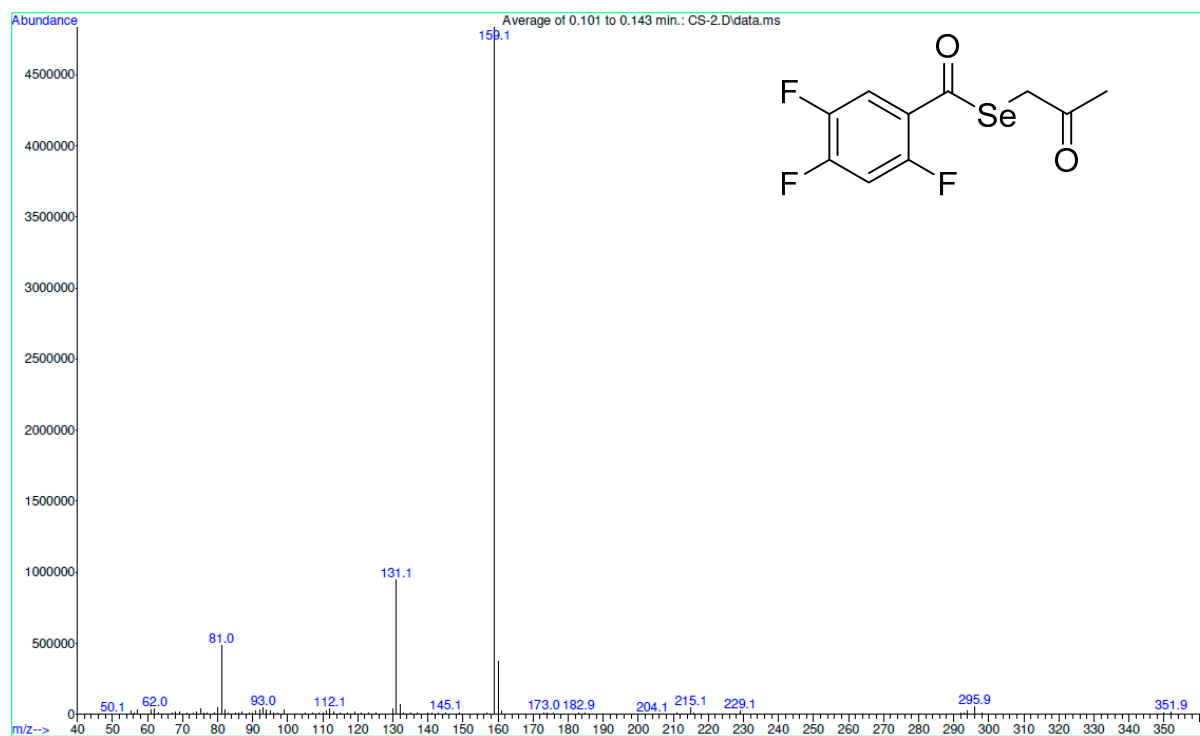

Figure S8B. DIP-MS spectrum of K8.

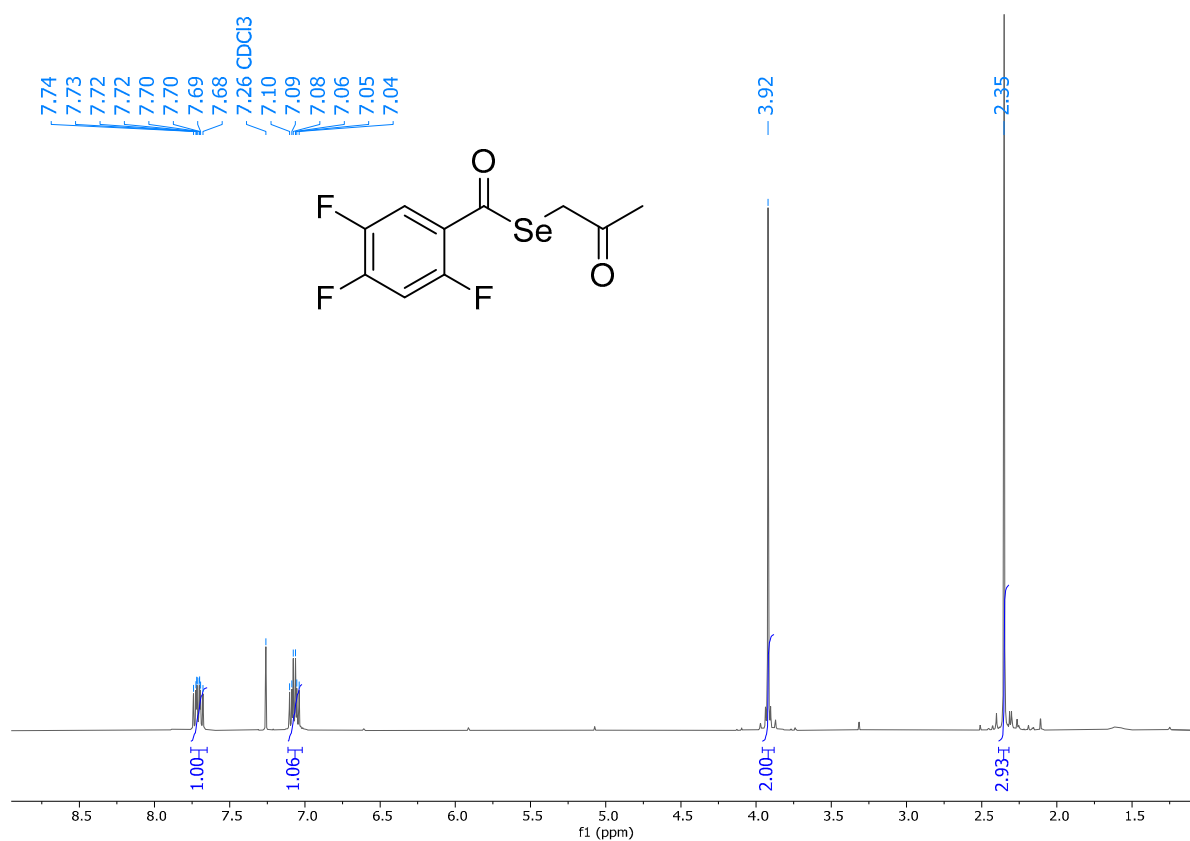

Figure S8. C. <sup>1</sup>H-NMR spectrum (CDCl<sub>3</sub>, 400 MHz) of K8.

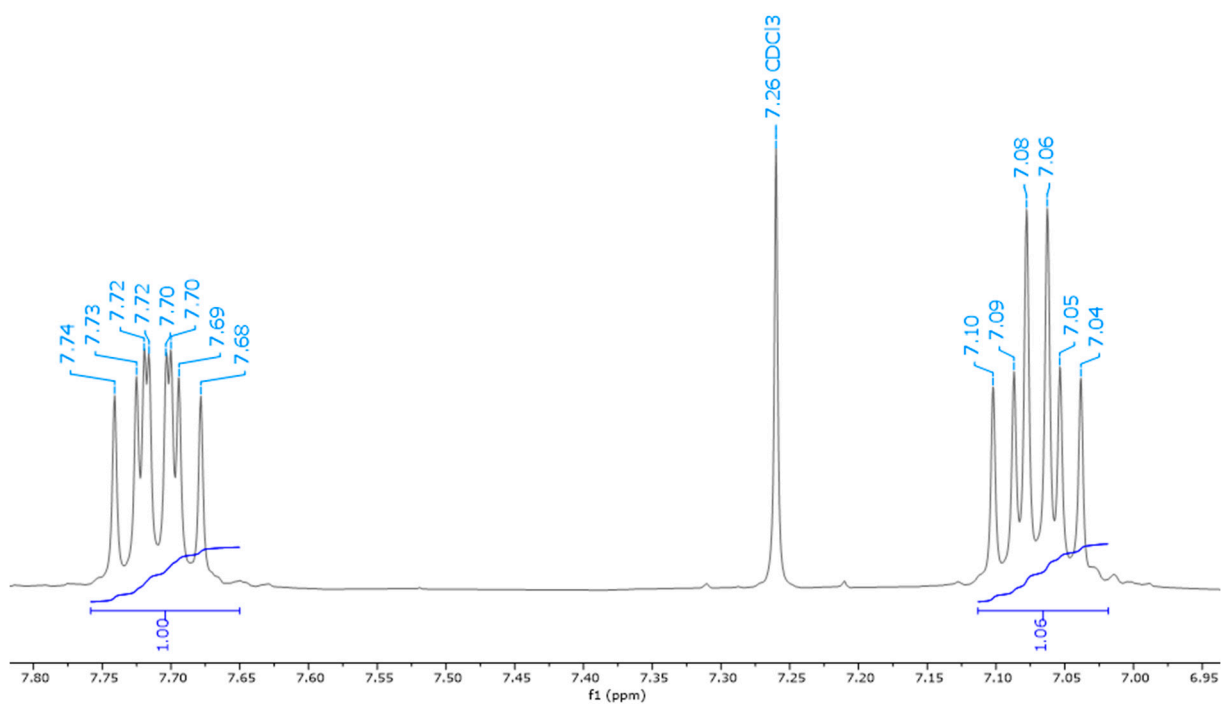

Figure S8D. <sup>1</sup>H-NMR spectrum (CDCl<sub>3</sub>, 400 MHz) of K8 (aromatics).

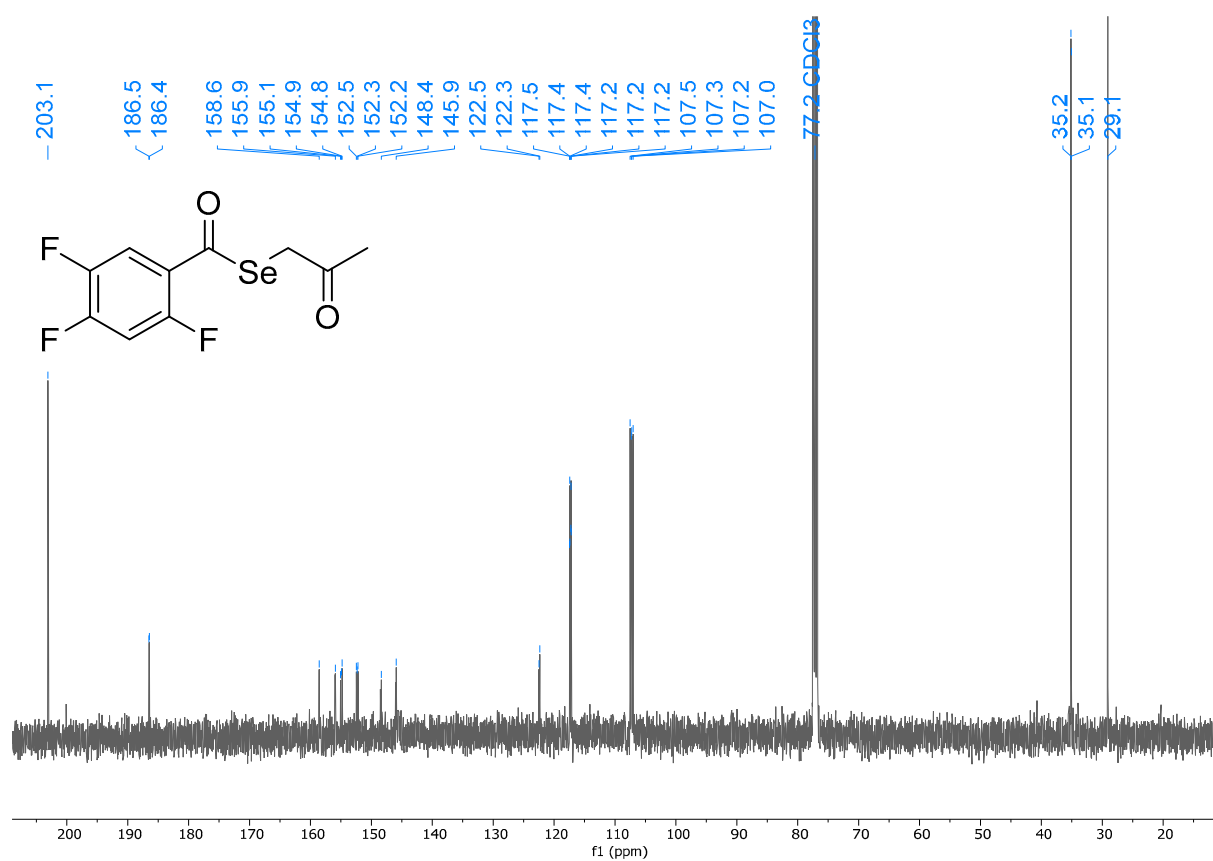

Figure S8E. <sup>13</sup>C-NMR spectrum (CDCl<sub>3</sub>, 101 MHz) of K8.

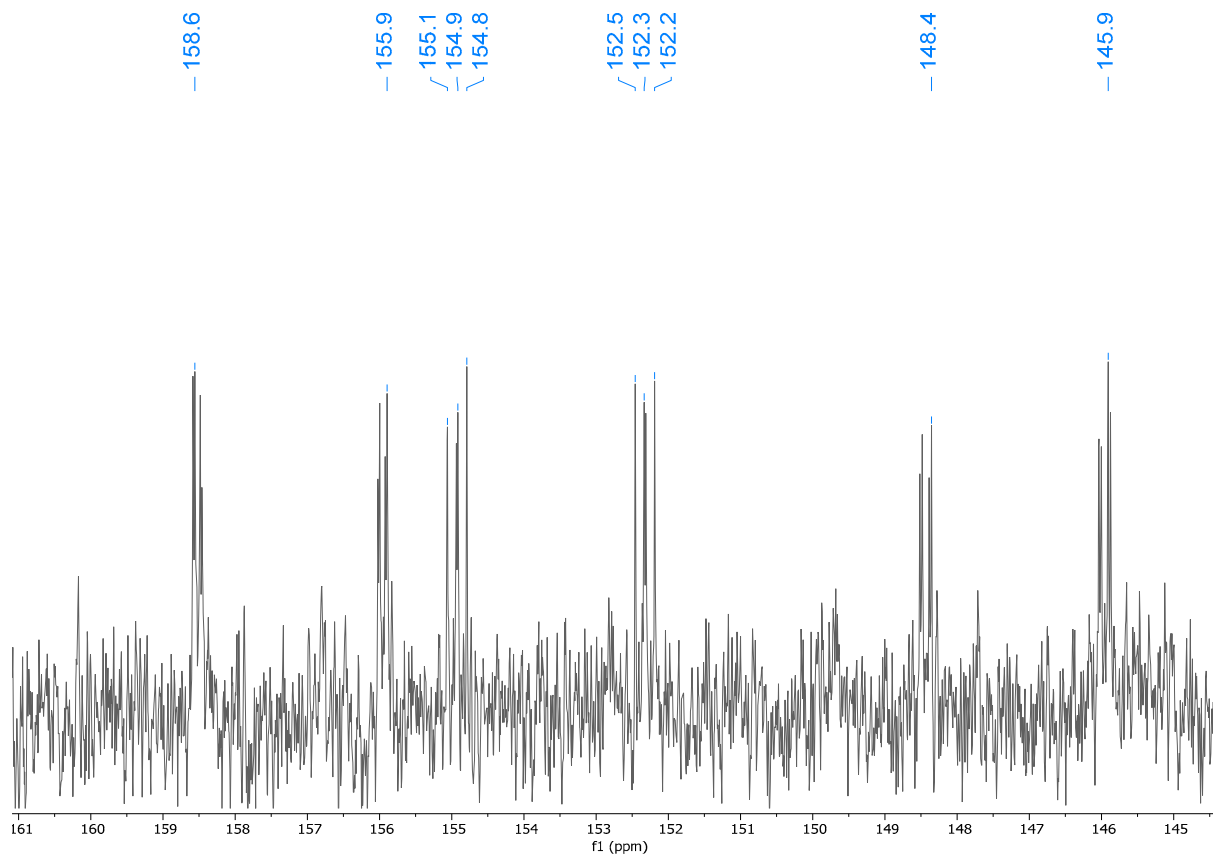

Figure S8F. <sup>13</sup>C-NMR spectrum (CDCl<sub>3</sub>, 101 MHz, aromatic carbons bound to fluorine) of K8.

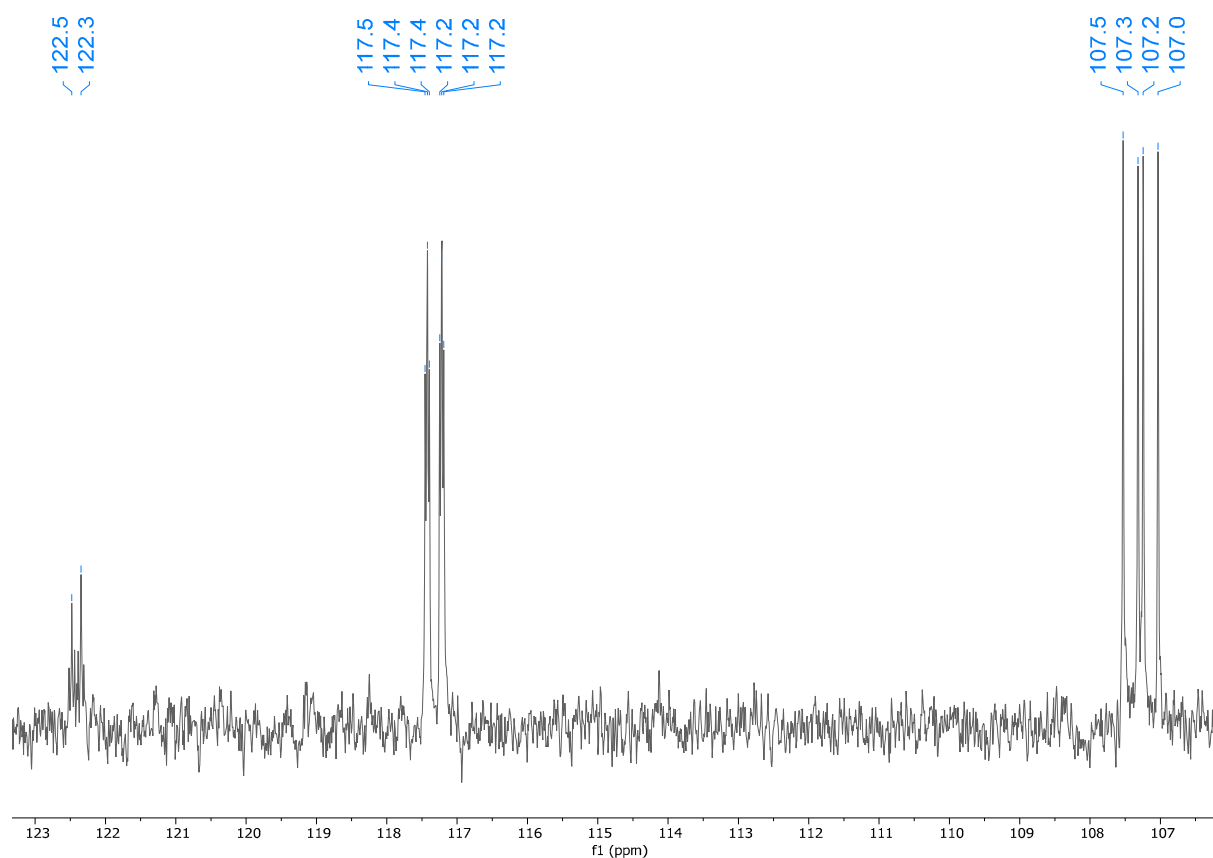

**Figure S8G.**  $^{13}\text{C}$ -NMR spectrum ( $\text{CDCl}_3$ , 101 MHz, aromatic carbons not bound to fluorine) of **K8**.

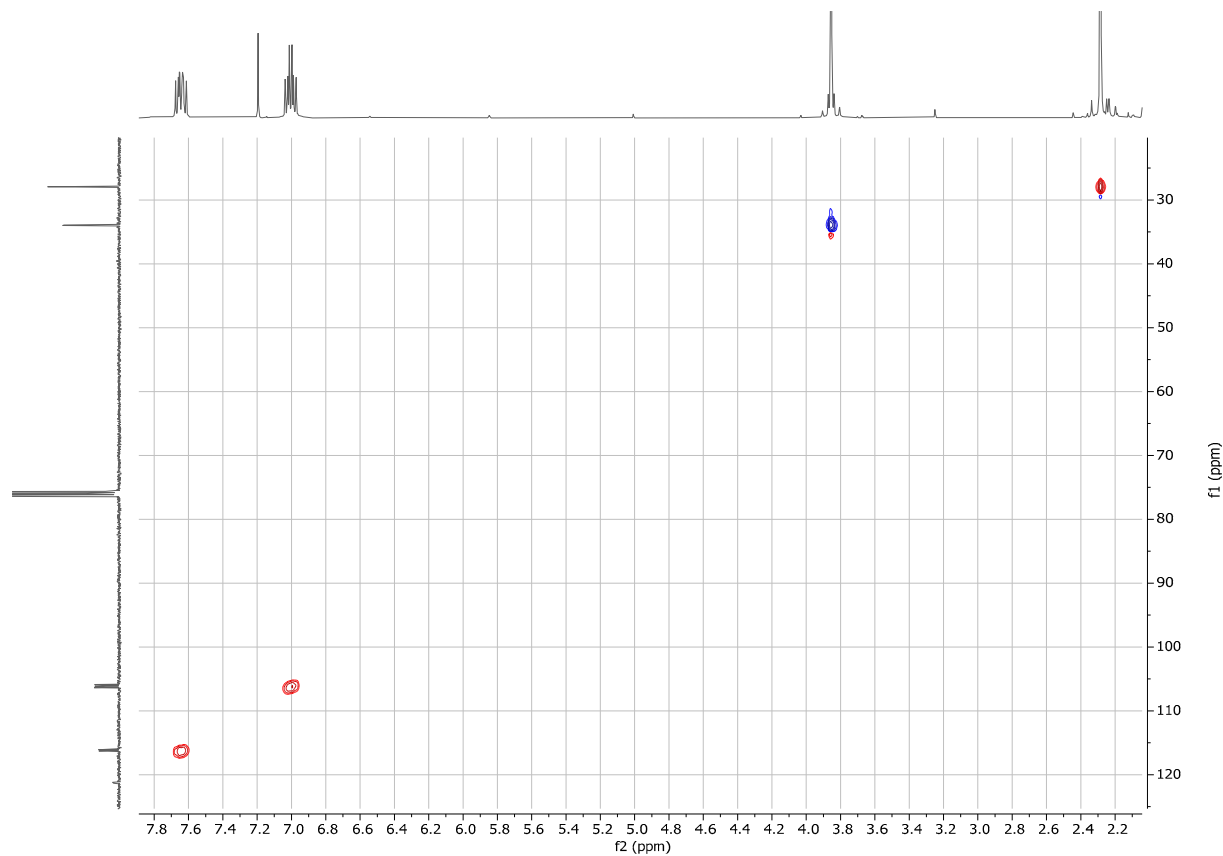

**Figure S8H.**  $^1\text{H}$ - $^{13}\text{C}$  HSQC NMR spectrum ( $\text{CDCl}_3$ ) of **K8**.

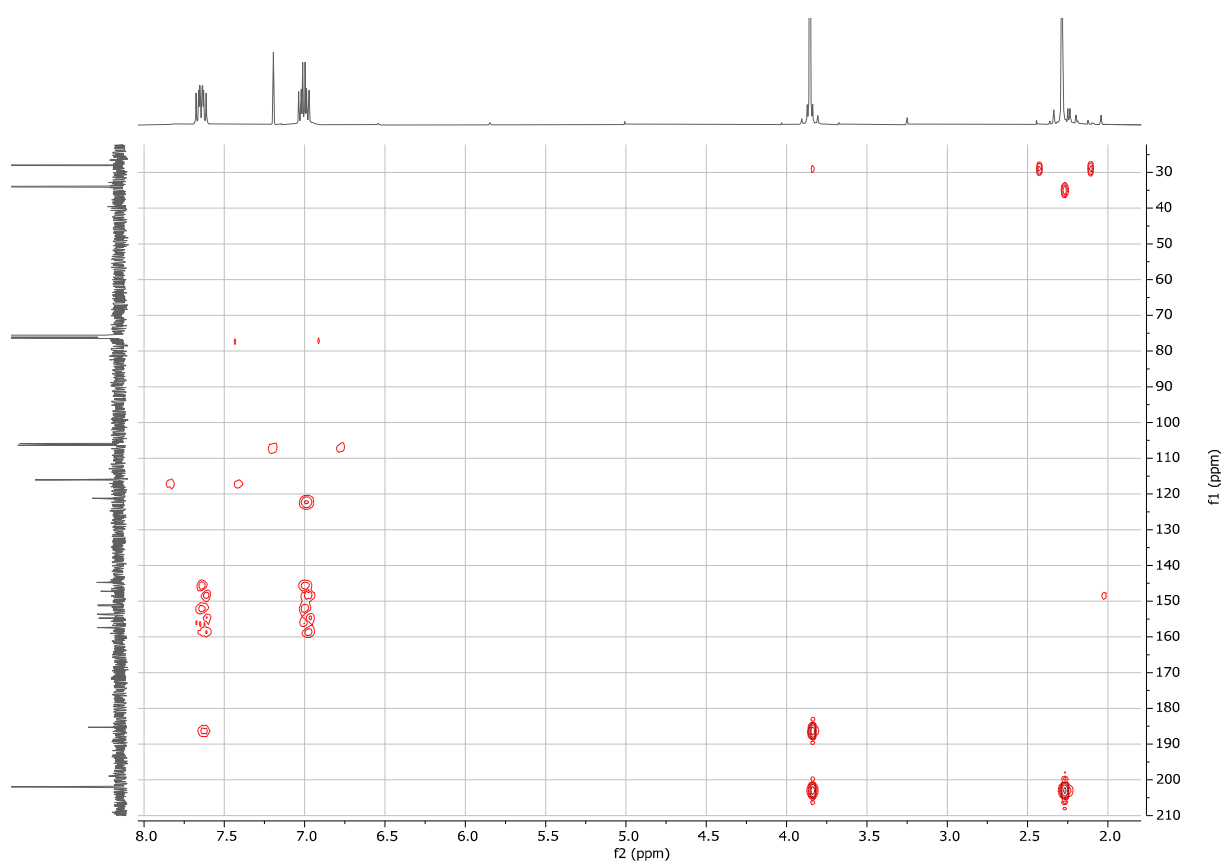

**Figure S8I.**  $^1\text{H}$ - $^{13}\text{C}$  HMBC NMR spectrum ( $\text{CDCl}_3$ ) of K8.

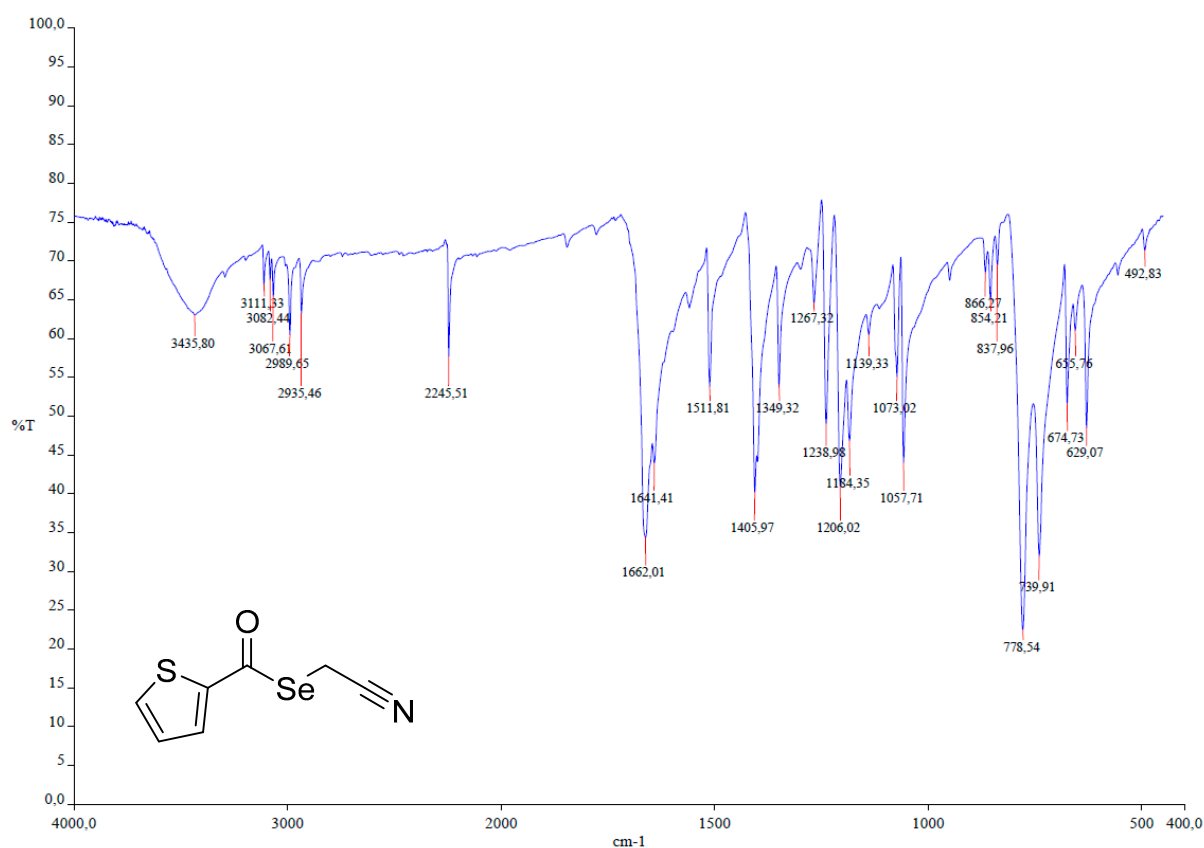

Figure S9. Compound N1: Se-(cyanomethyl) thiophene-2-carboselenoate. S9A. IR spectrum (KBr) of N1.

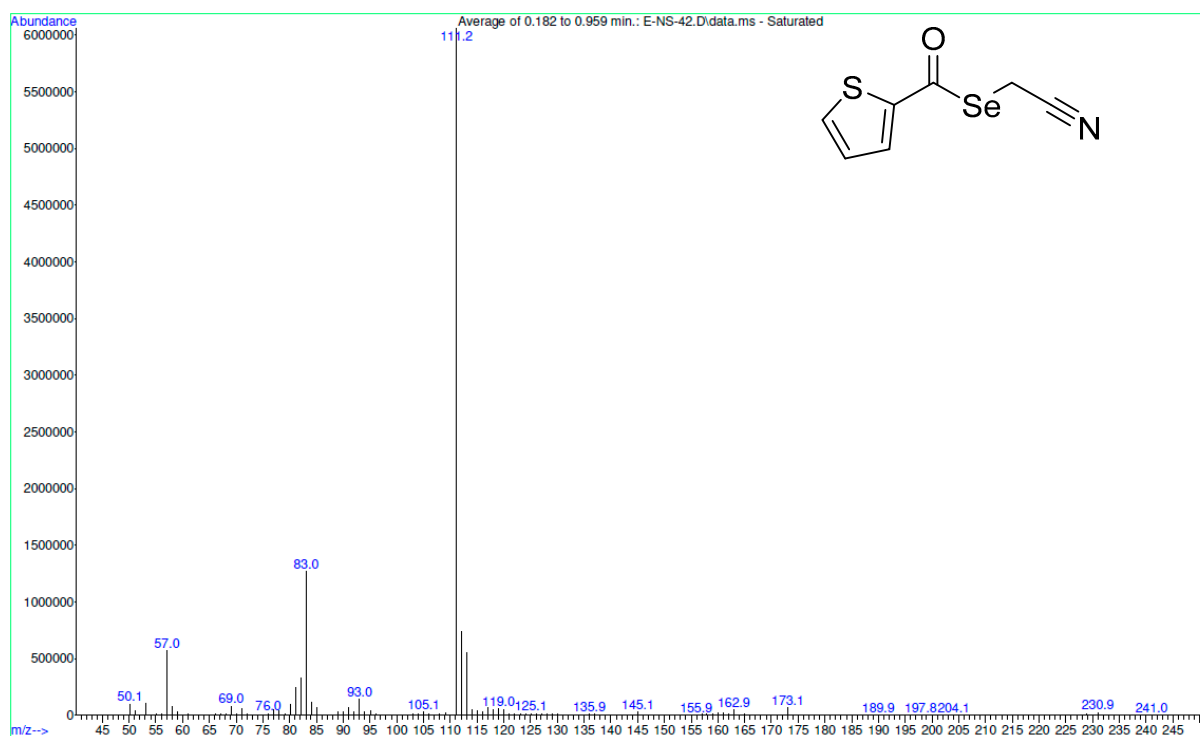

Figure S9B. DIP-MS spectrum of N1.

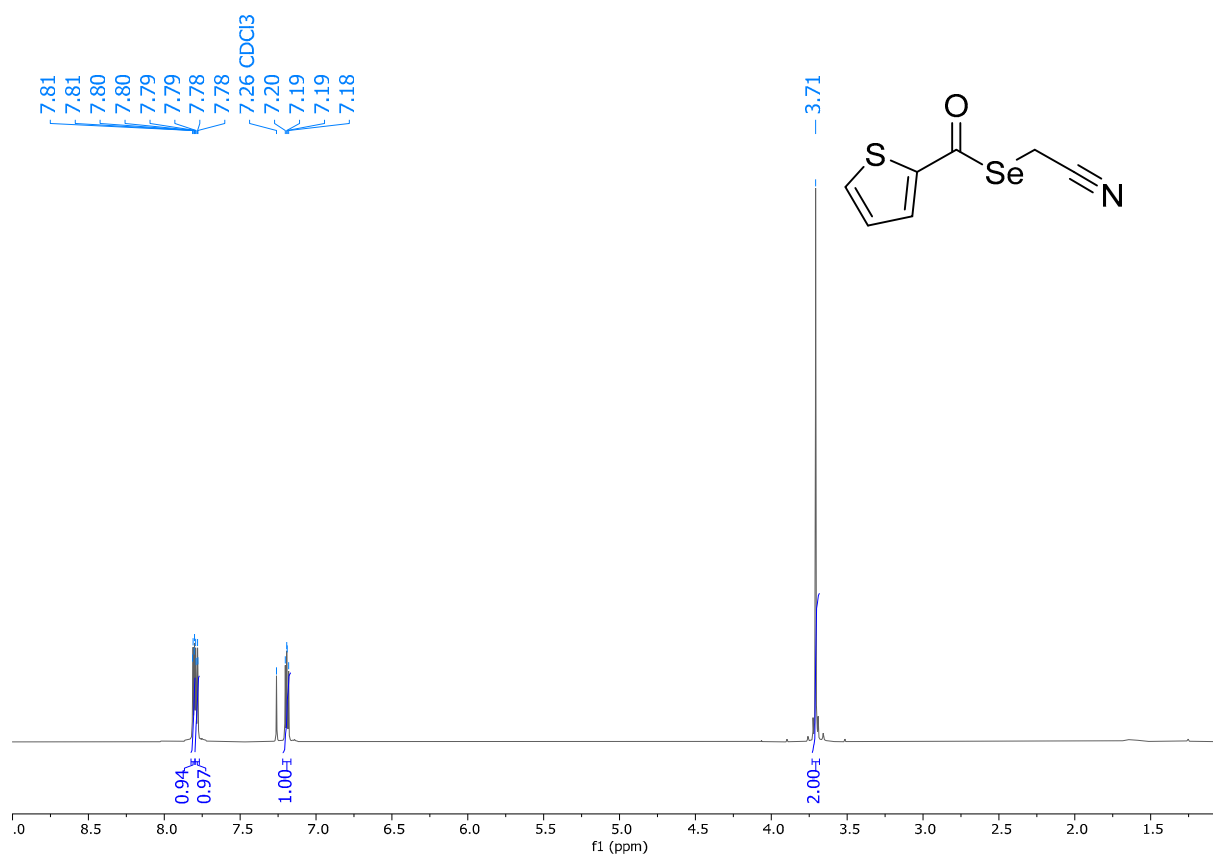

Figure S9C.  $^1\text{H}$ -NMR spectrum ( $\text{CDCl}_3$ , 400 MHz) of **N1**.

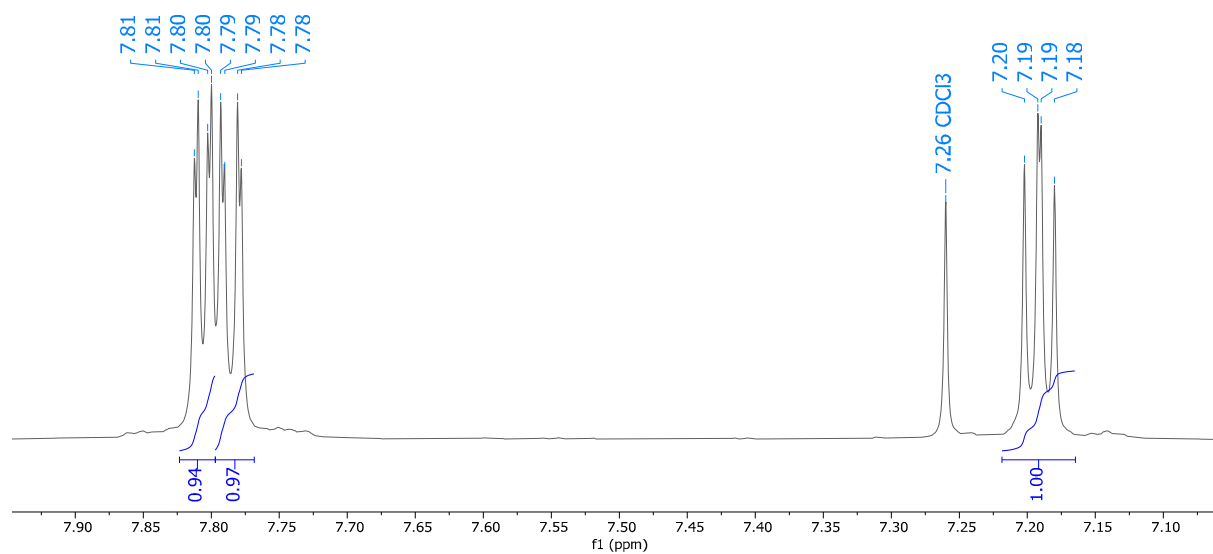

Figure S9D.  $^1\text{H}$ -NMR spectrum ( $\text{CDCl}_3$ , 400 MHz) of **N1** (aromatics).



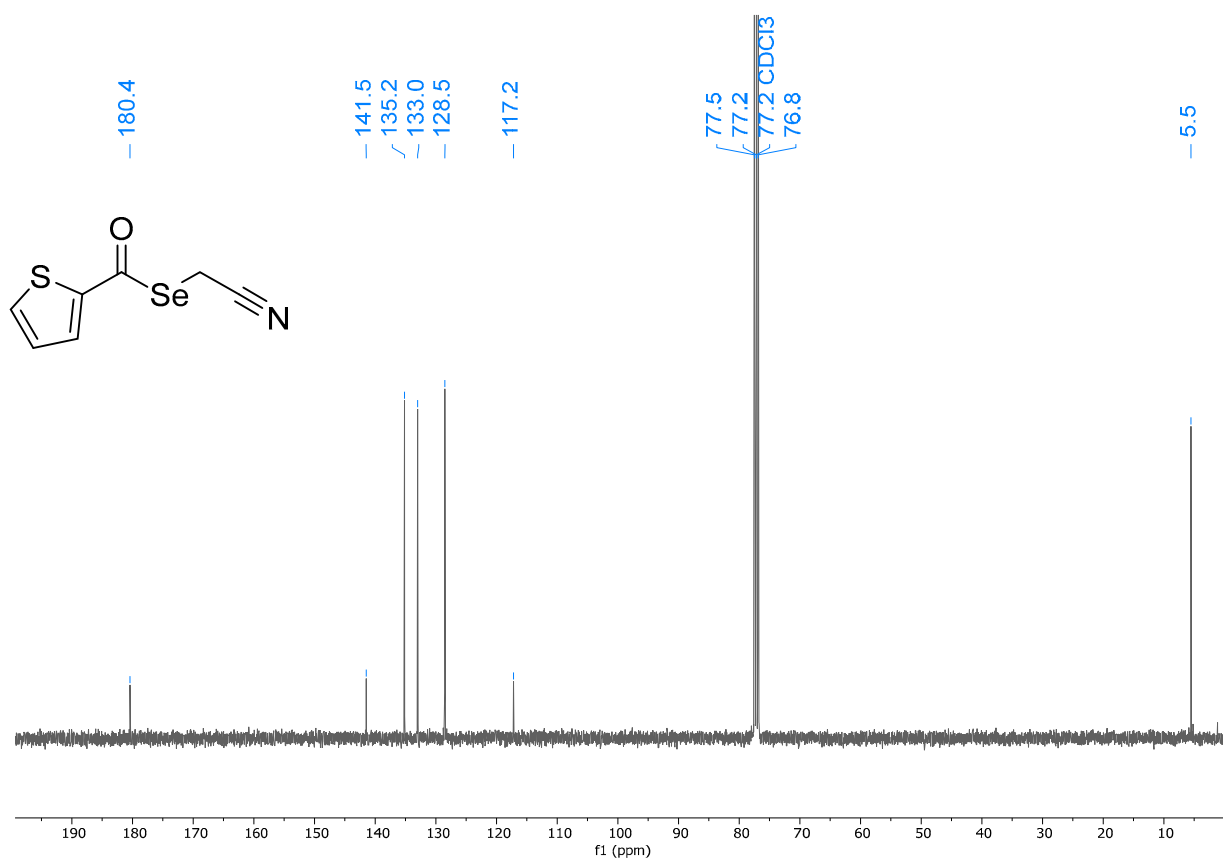

Figure S9E. <sup>13</sup>C-NMR spectrum (CDCl<sub>3</sub>, 101 MHz) of N1.

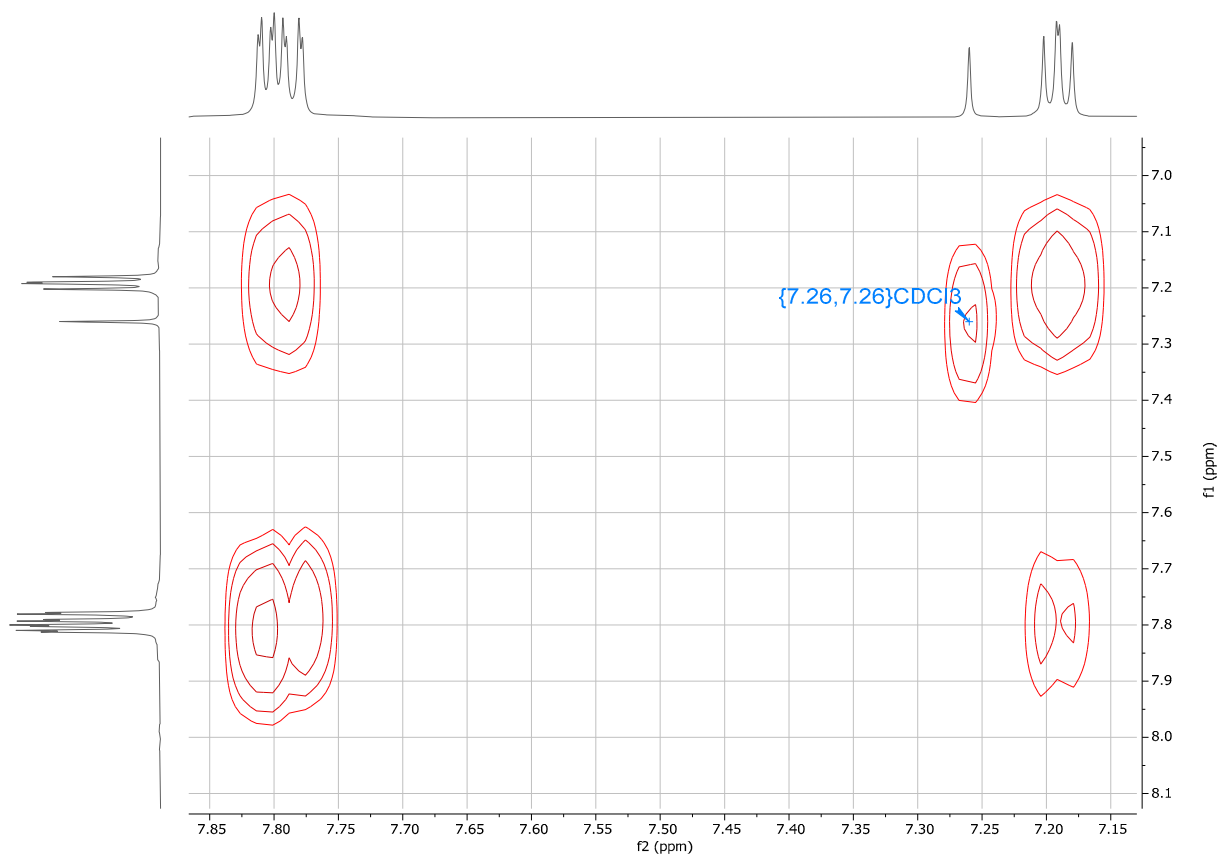

Figure S9F. <sup>1</sup>H-<sup>1</sup>H COSY NMR spectrum (CDCl<sub>3</sub>) of N1 (aromatics).

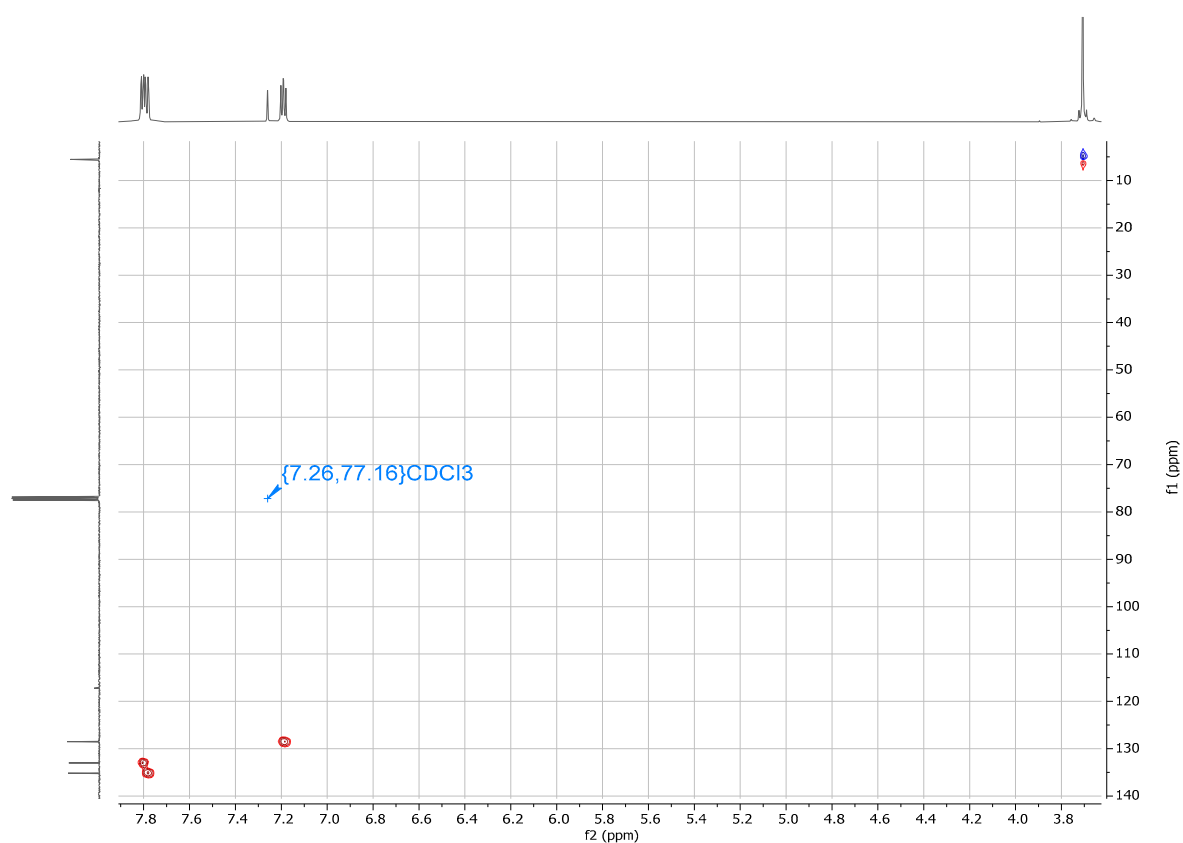

Figure S9G.  $^1\text{H}$ - $^{13}\text{C}$  HSQC NMR spectrum ( $\text{CDCl}_3$ ) of N1.

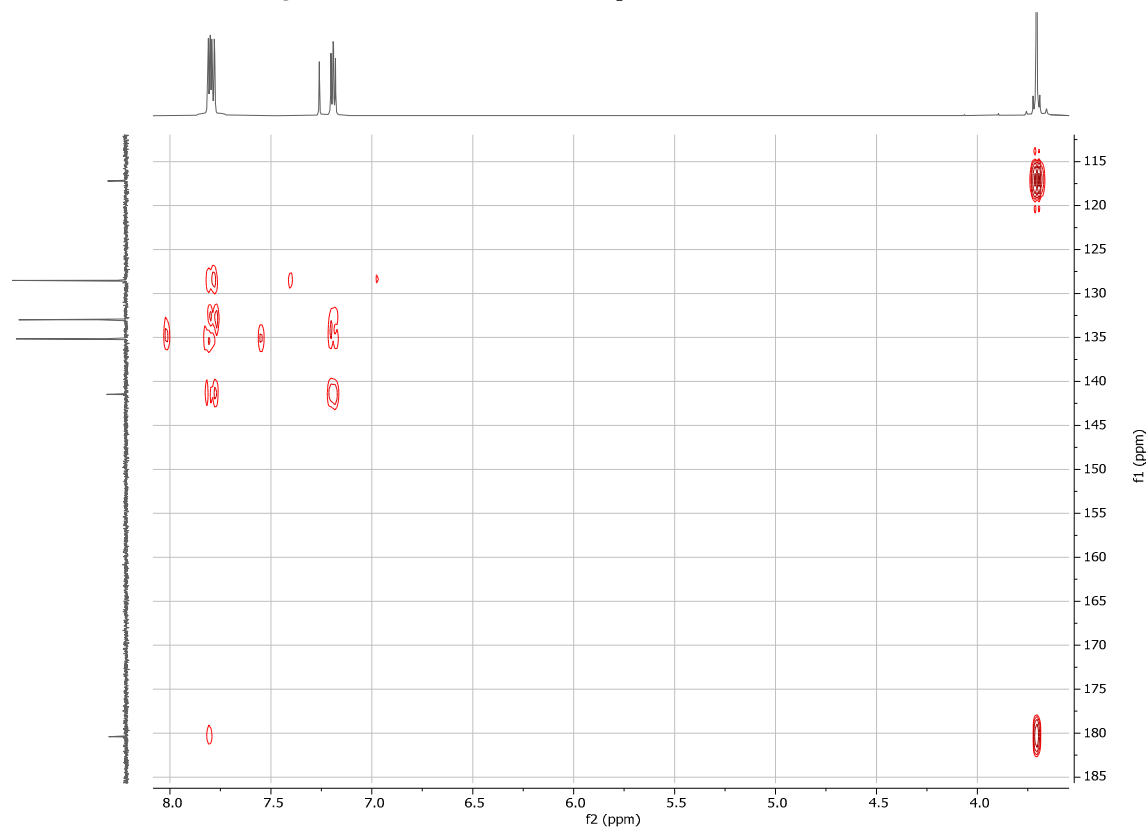

Figure S9H.  $^1\text{H}$ - $^{13}\text{C}$  HMBC NMR spectrum ( $\text{CDCl}_3$ ) of N1.

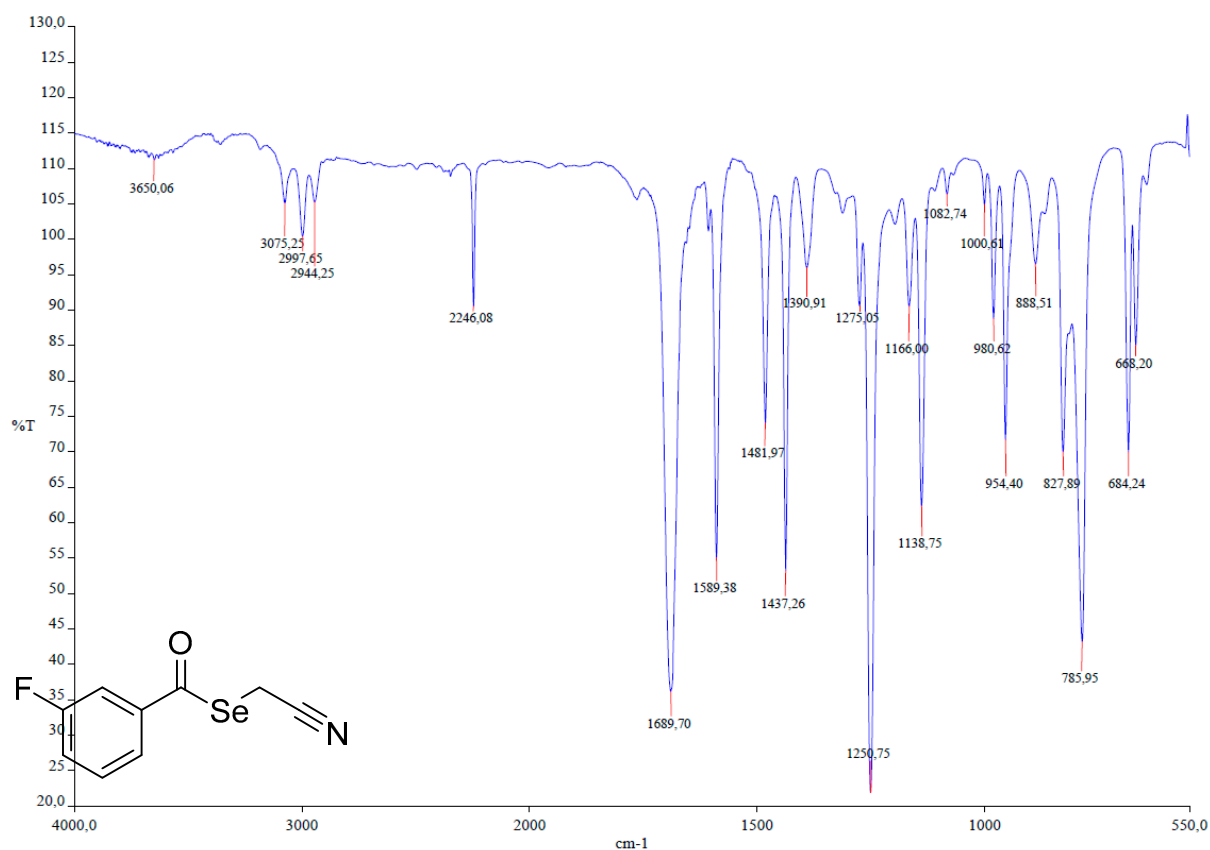

Figure S10. Compound N2: Se-(cyanomethyl) 3-fluorobenzoselenoate. S10A. IR spectrum (NaCl) of N2.

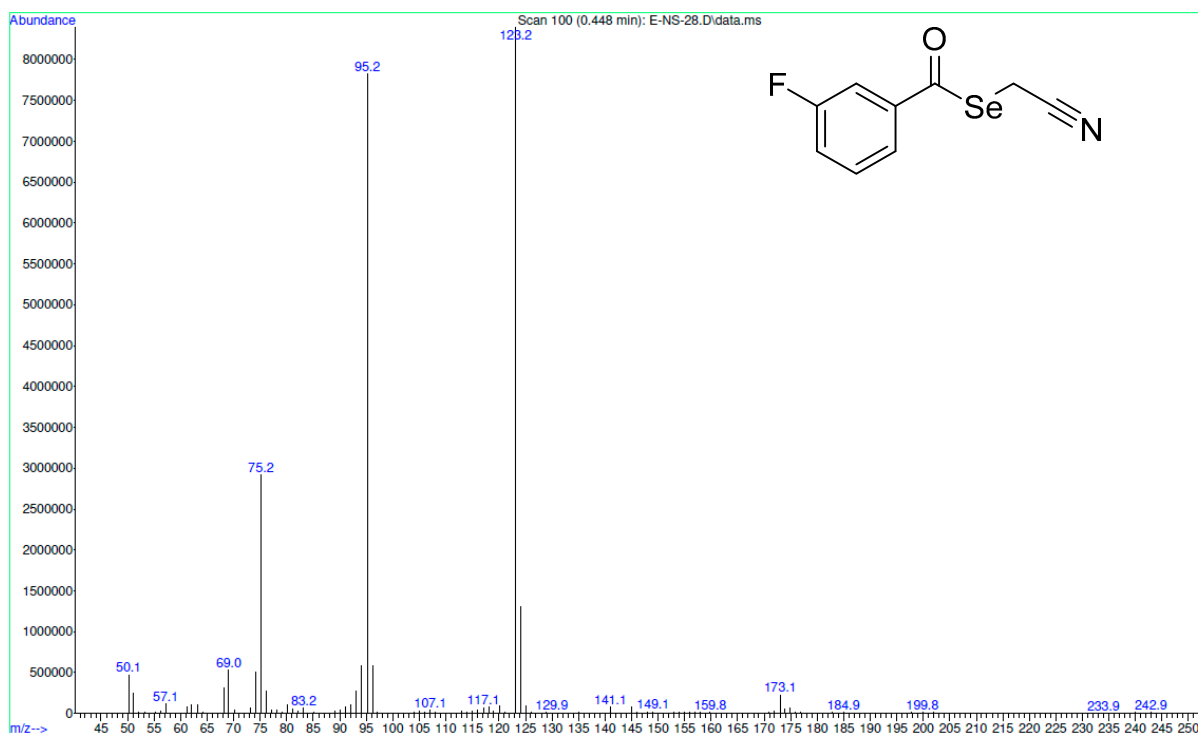

Figure S10B. DIP-MS spectrum of N2.

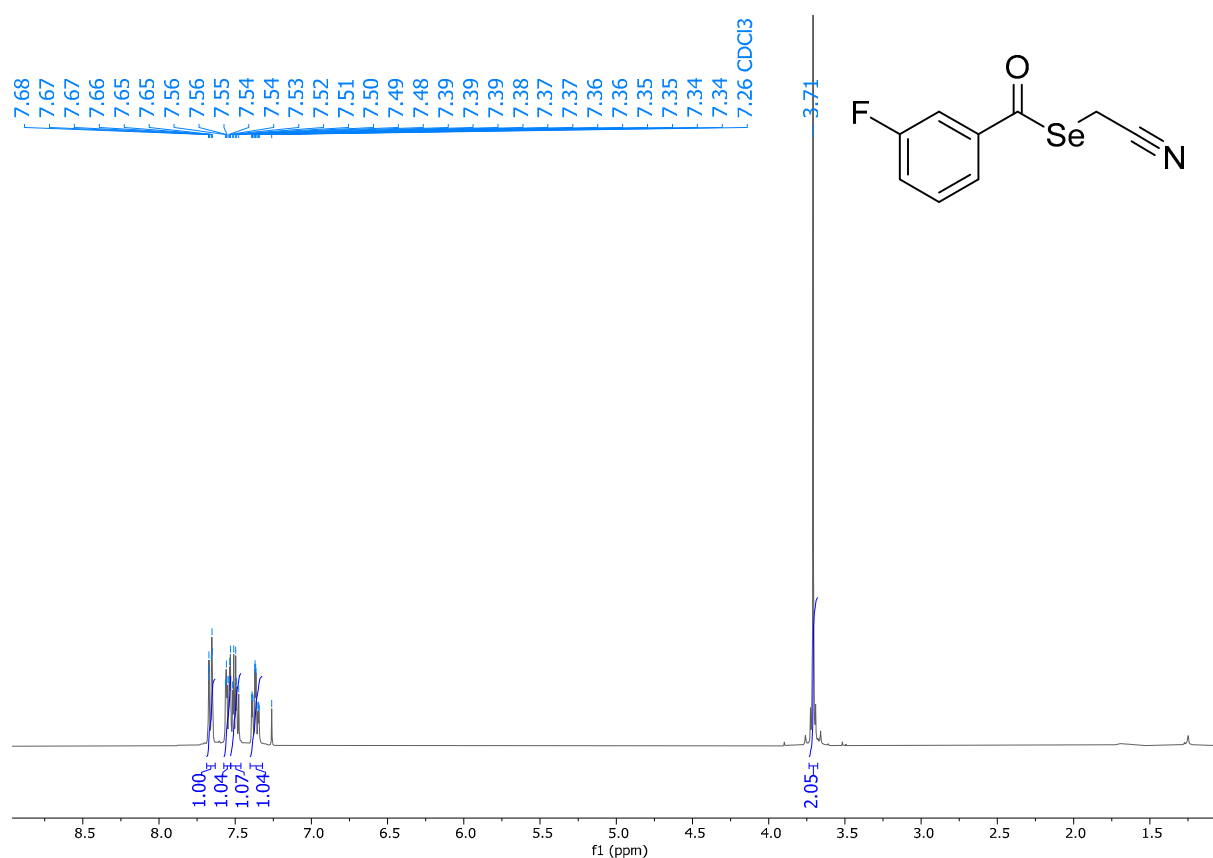

Figure S10C.  $^1\text{H}$ -NMR spectrum (CDCl<sub>3</sub>, 400 MHz) of N2.

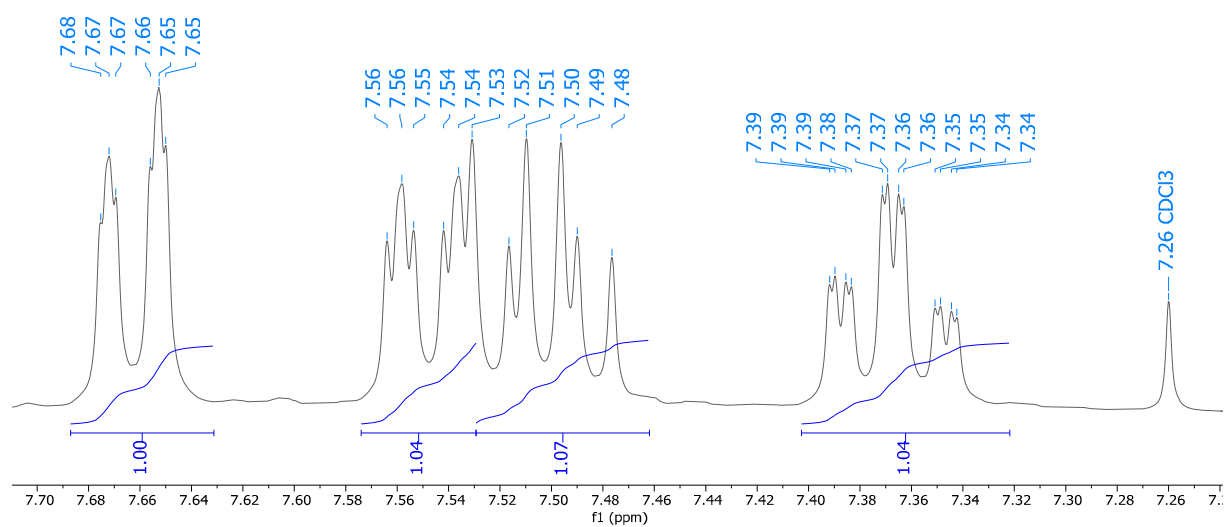

Figure S10D.  $^1\text{H}$ -NMR spectrum (CDCl<sub>3</sub>, 400 MHz) of N2 (aromatics).

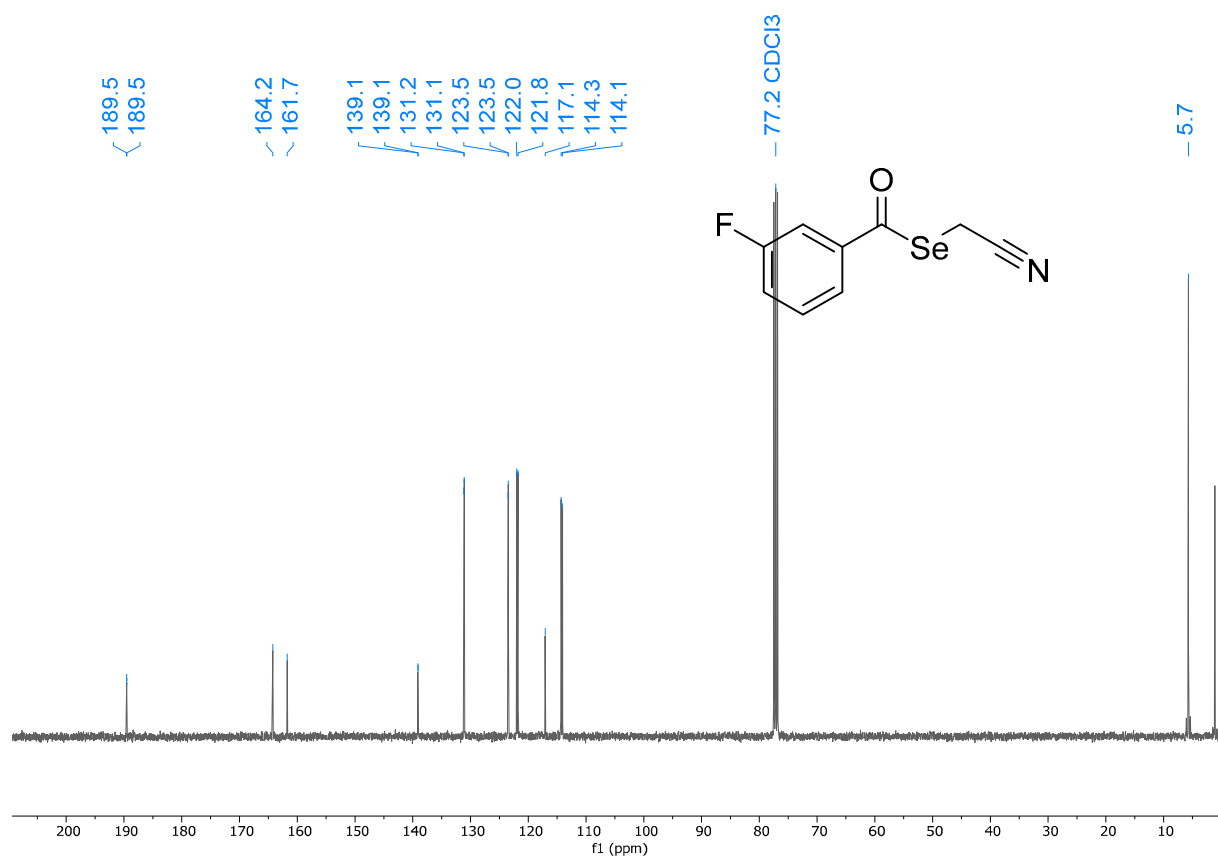

Figure S10E. <sup>13</sup>C-NMR spectrum (CDCl<sub>3</sub>, 101 MHz) of N2.

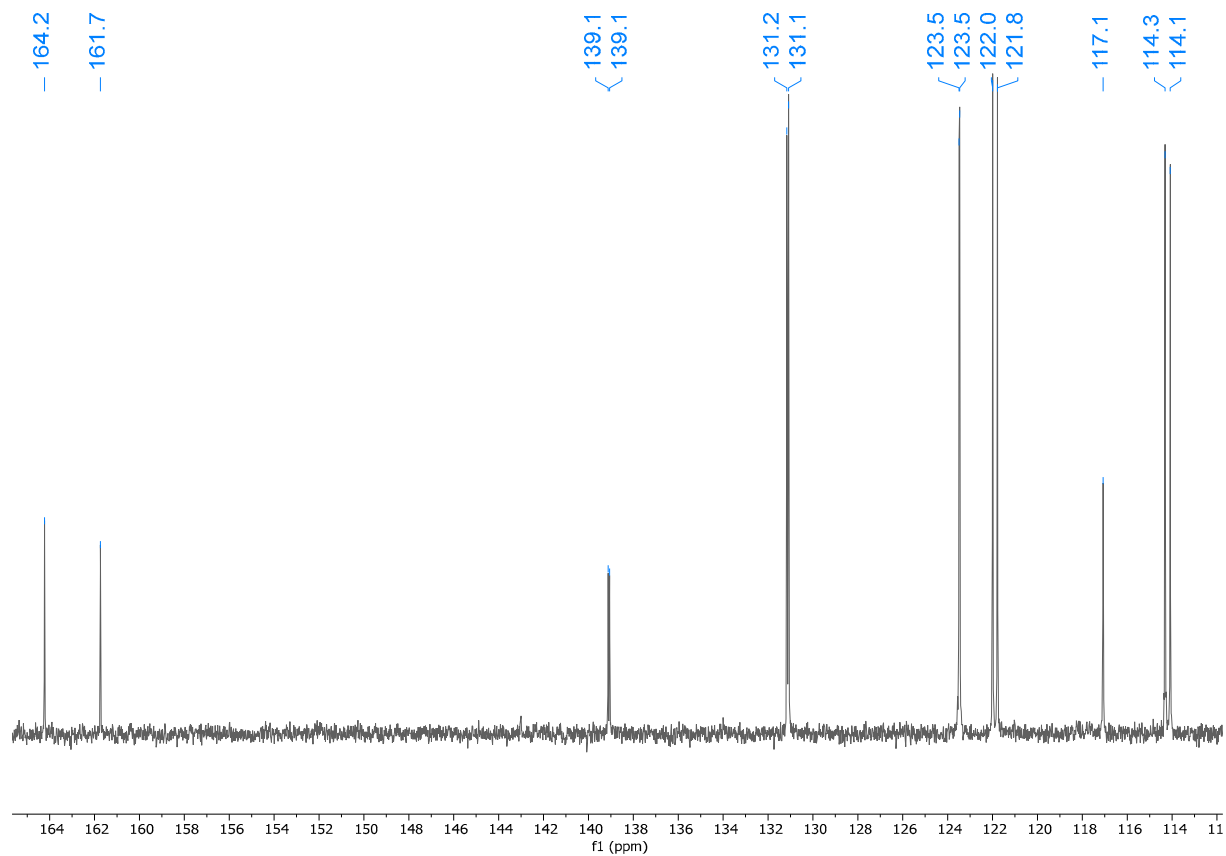

Figure S10F. <sup>13</sup>C-NMR spectrum (CDCl<sub>3</sub>, 101 MHz) of N2 (aromatics, CN).

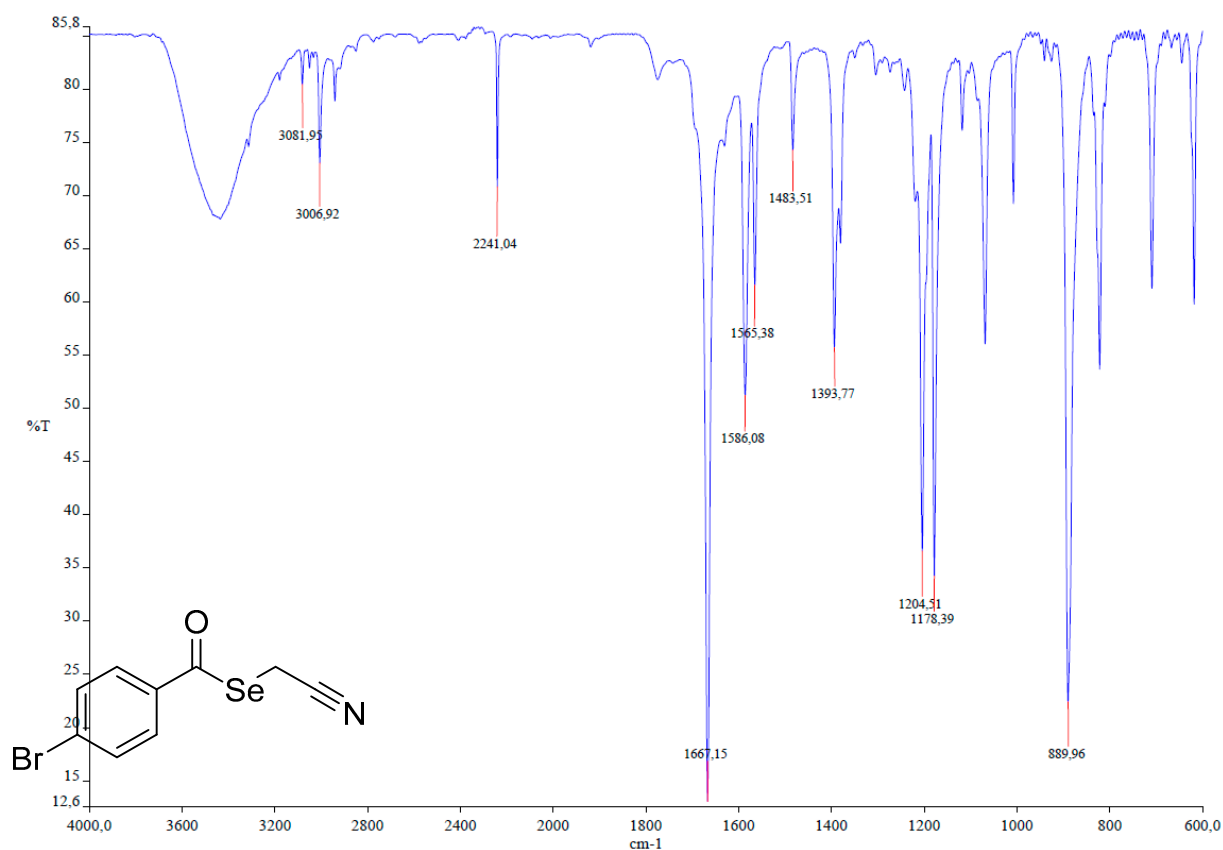

Figure S11. Compound N3: Se-(cyanomethyl) 4-bromobenzoselenoate. S11A. IR spectrum (KBr) of N3.

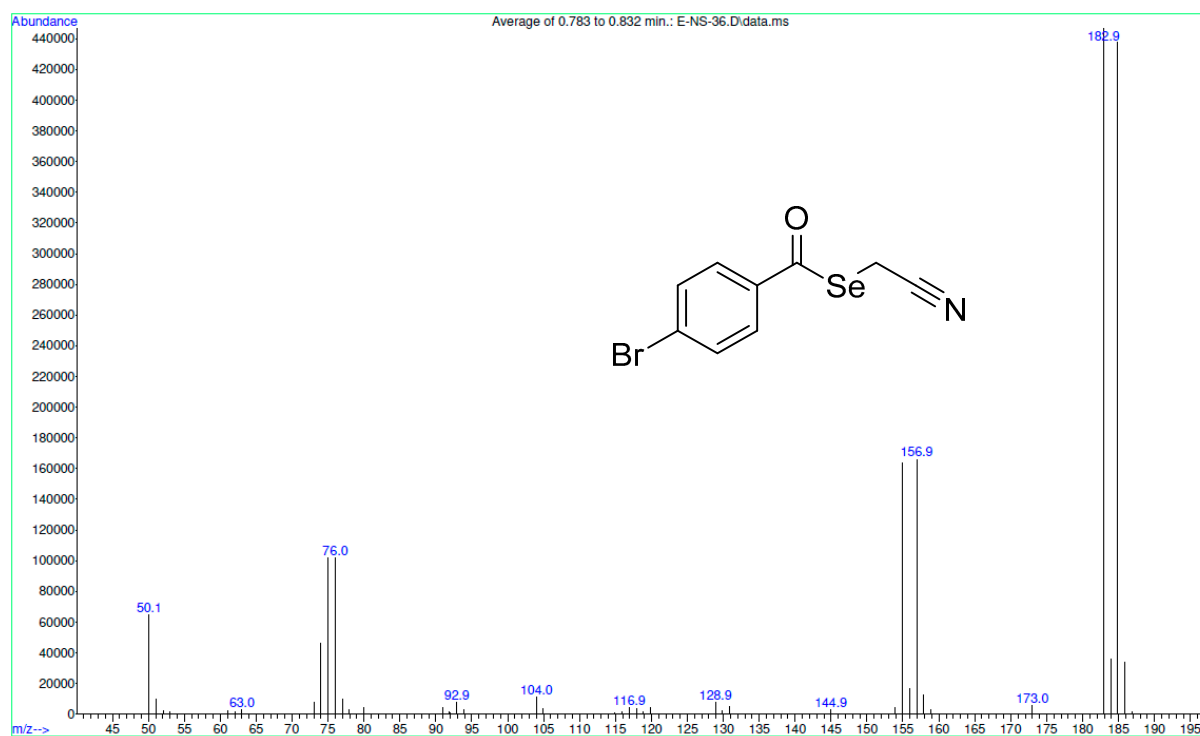

Figure S11B. DIP-MS spectrum of N3.

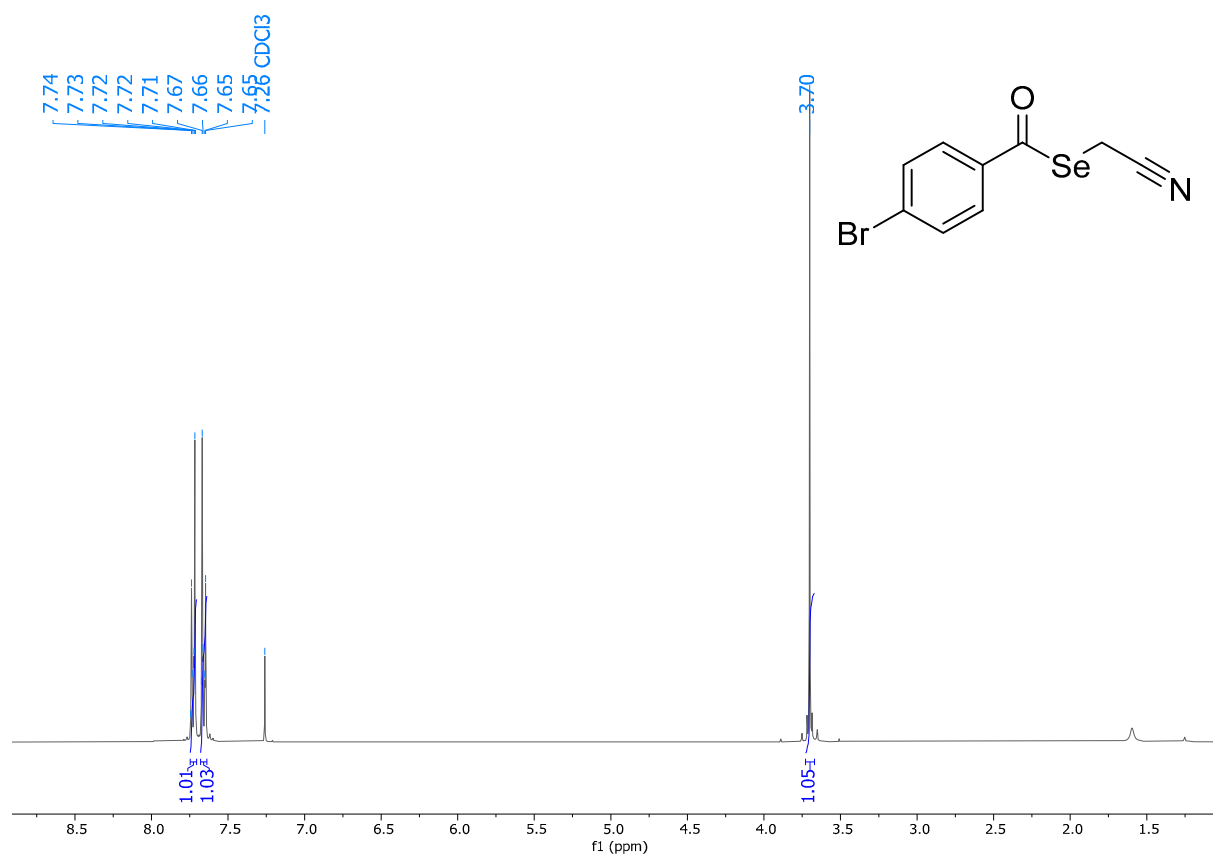

Figure S11C.  $^1\text{H}$ -NMR spectrum (CDCl<sub>3</sub>, 400 MHz) of N3.

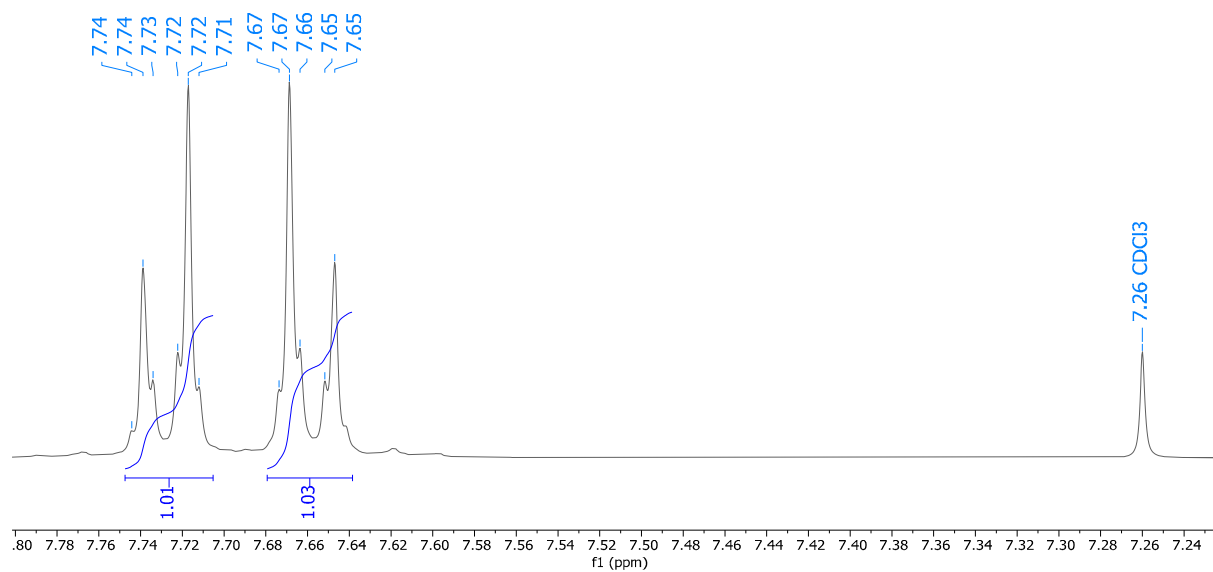

Figure S11D.  $^1\text{H}$ -NMR spectrum (CDCl<sub>3</sub>, 400 MHz) of N3 (aromatics).

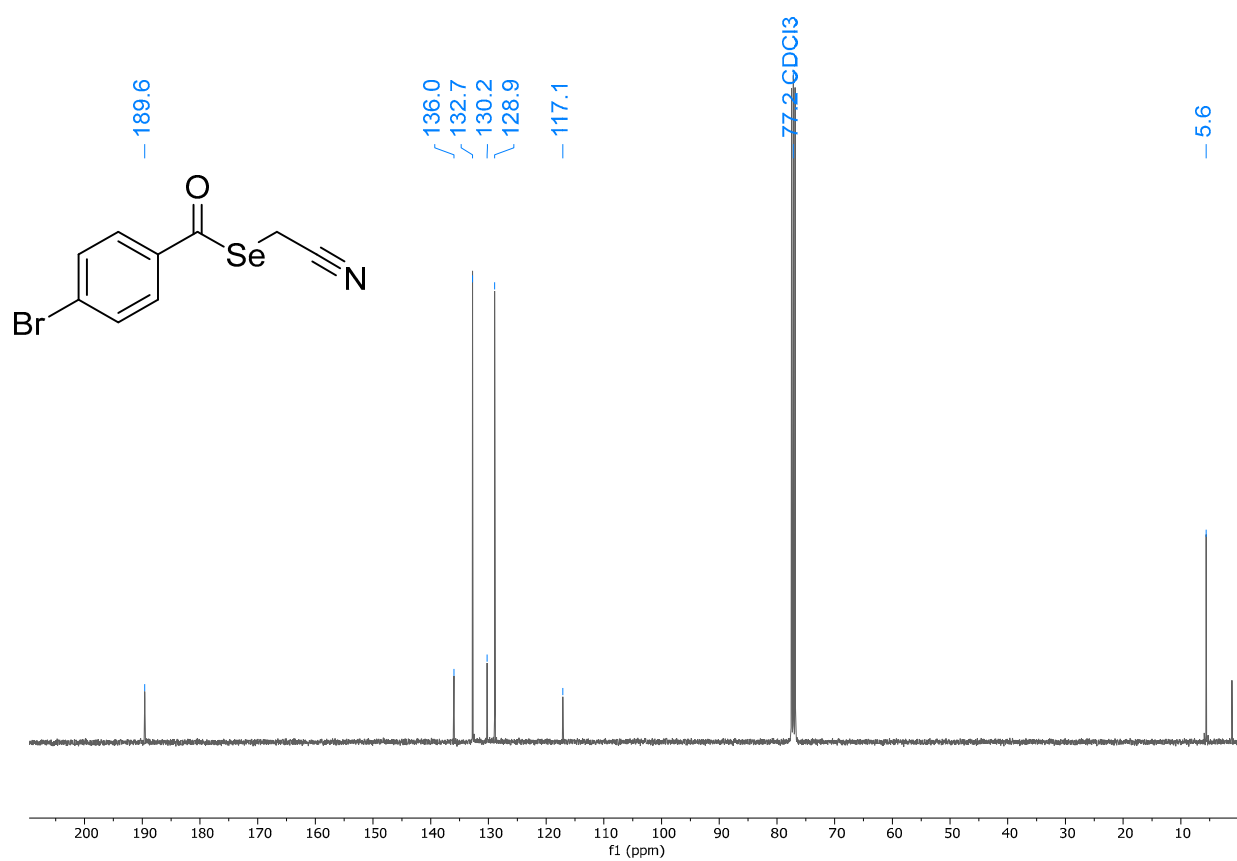

**Figure S11E.** <sup>13</sup>C-NMR spectrum (CDCl<sub>3</sub>, 101 MHz) of N3.



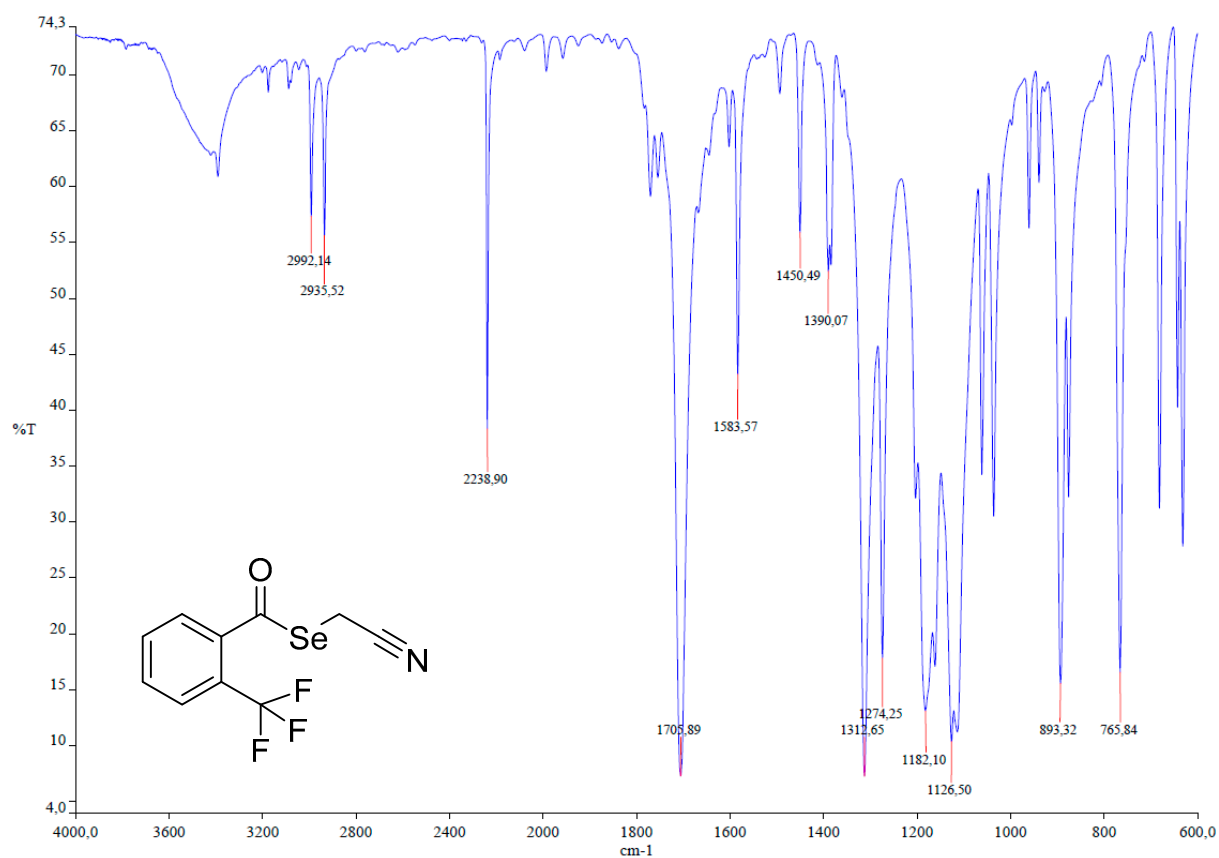

Figure S12. Compound N4: Se-(cyanomethyl) 2-(trifluoromethyl)benzoselenoate. S12A. IR spectrum (KBr) of N4.

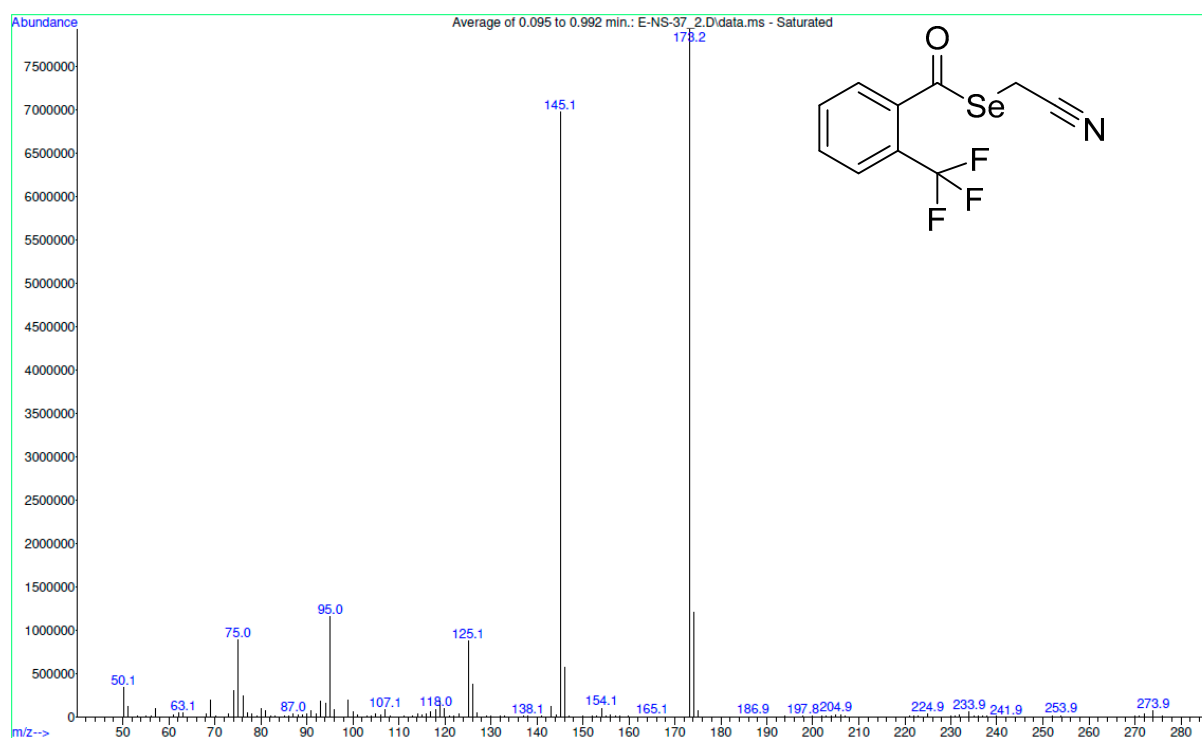

Figure S12B. DIP-MS spectrum of N4.

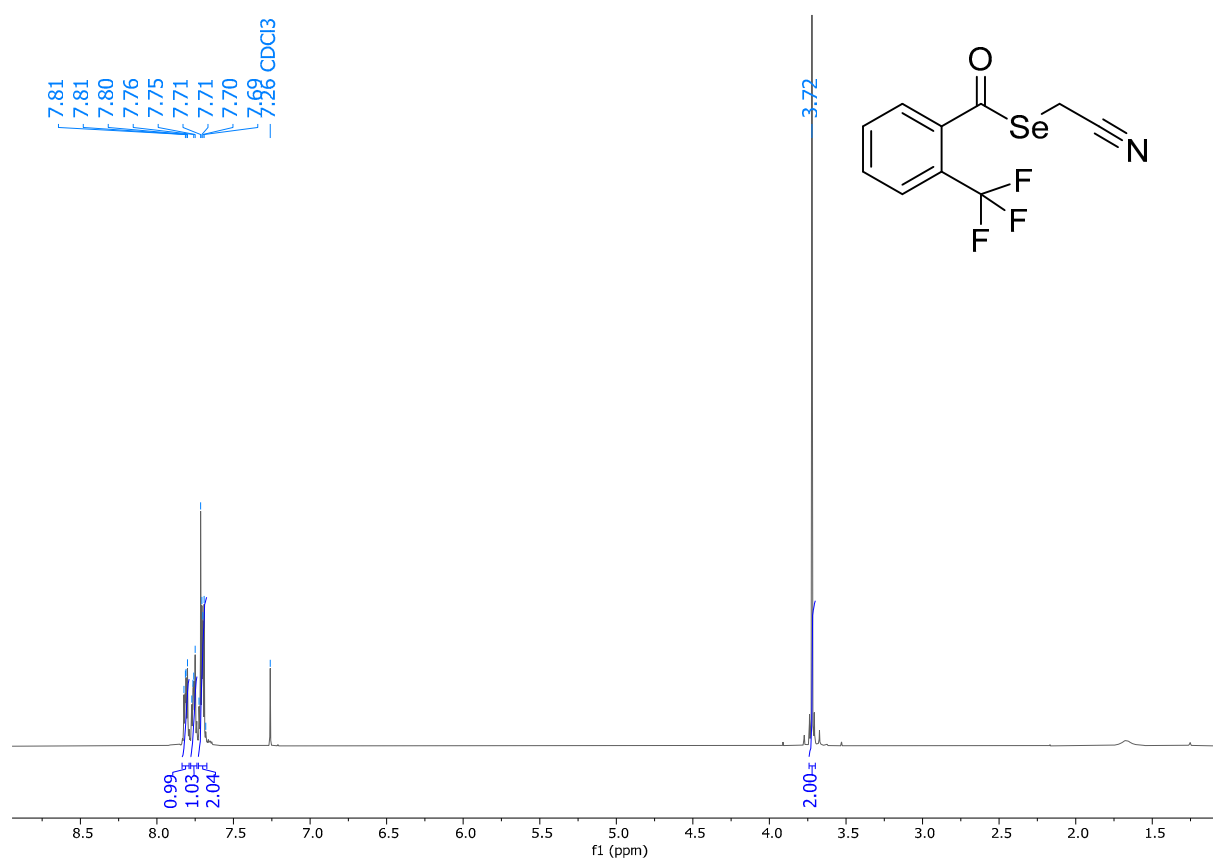

Figure S12C. <sup>1</sup>H-NMR spectrum (CDCl<sub>3</sub>, 400 MHz) of N4.

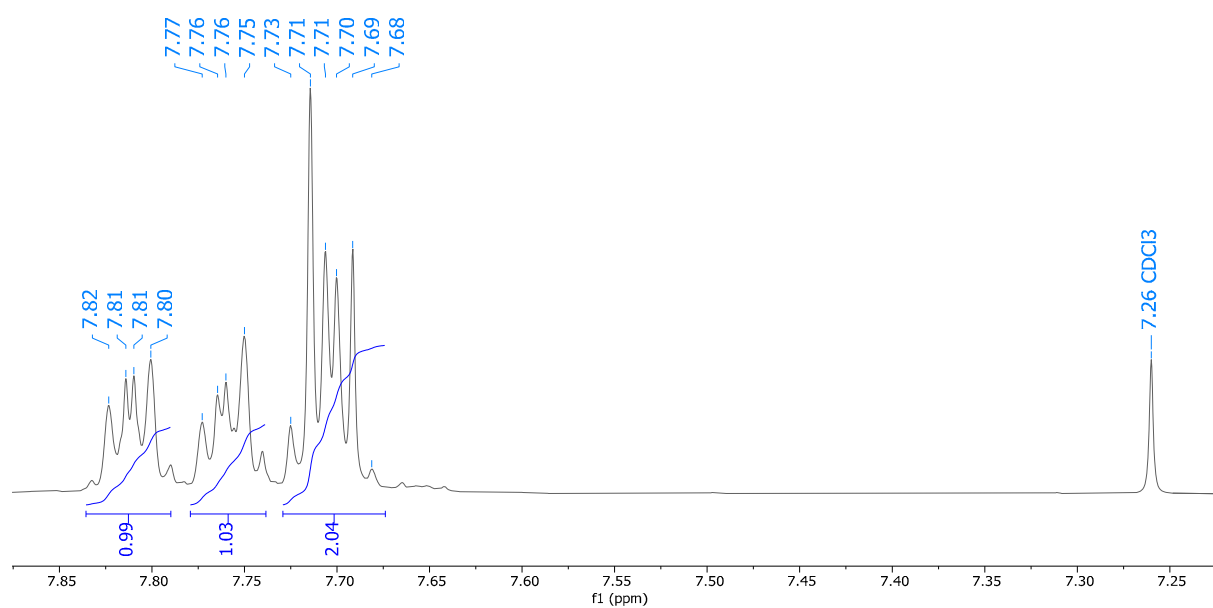

Figure S12D. <sup>1</sup>H-NMR spectrum (CDCl<sub>3</sub>, 400 MHz) of N4 (aromatics).

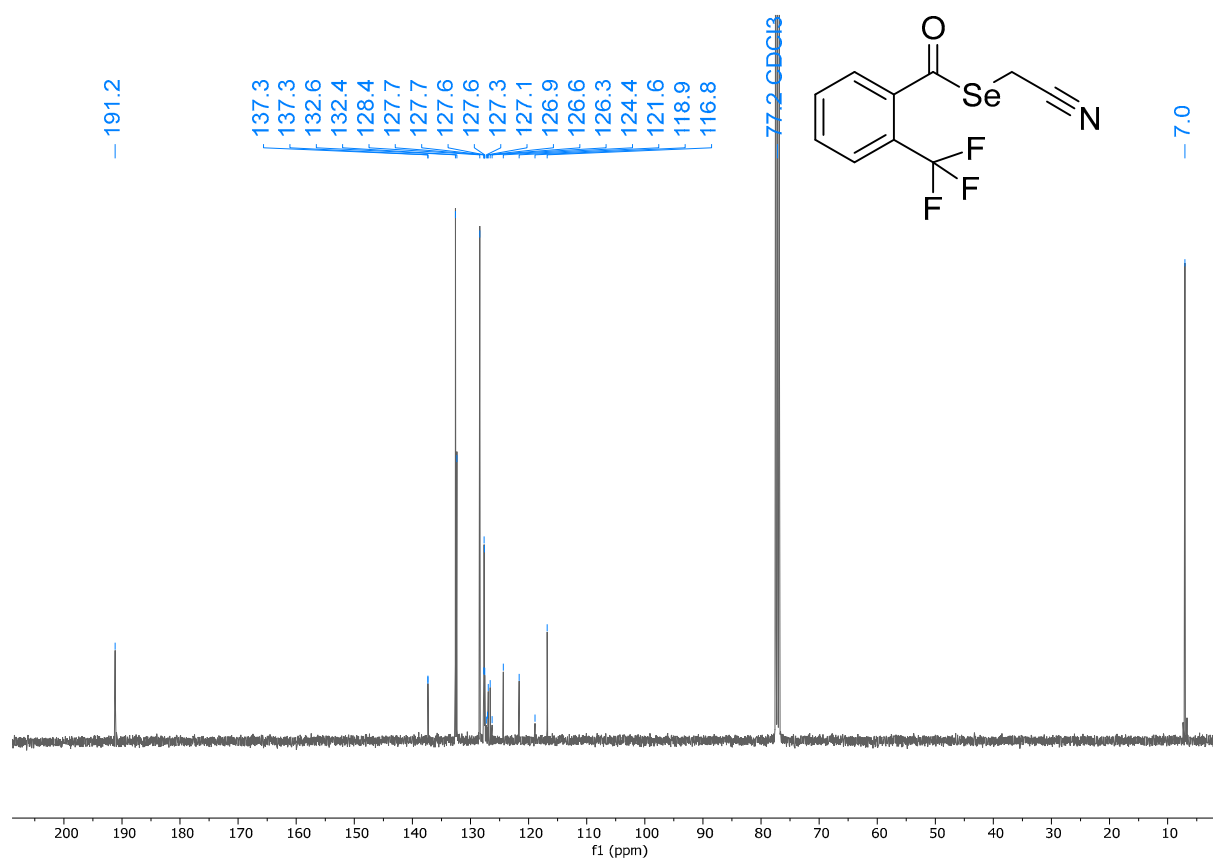

Figure S12E.  $^{13}\text{C}$ -NMR spectrum (CDCl<sub>3</sub>, 101 MHz) of N4.

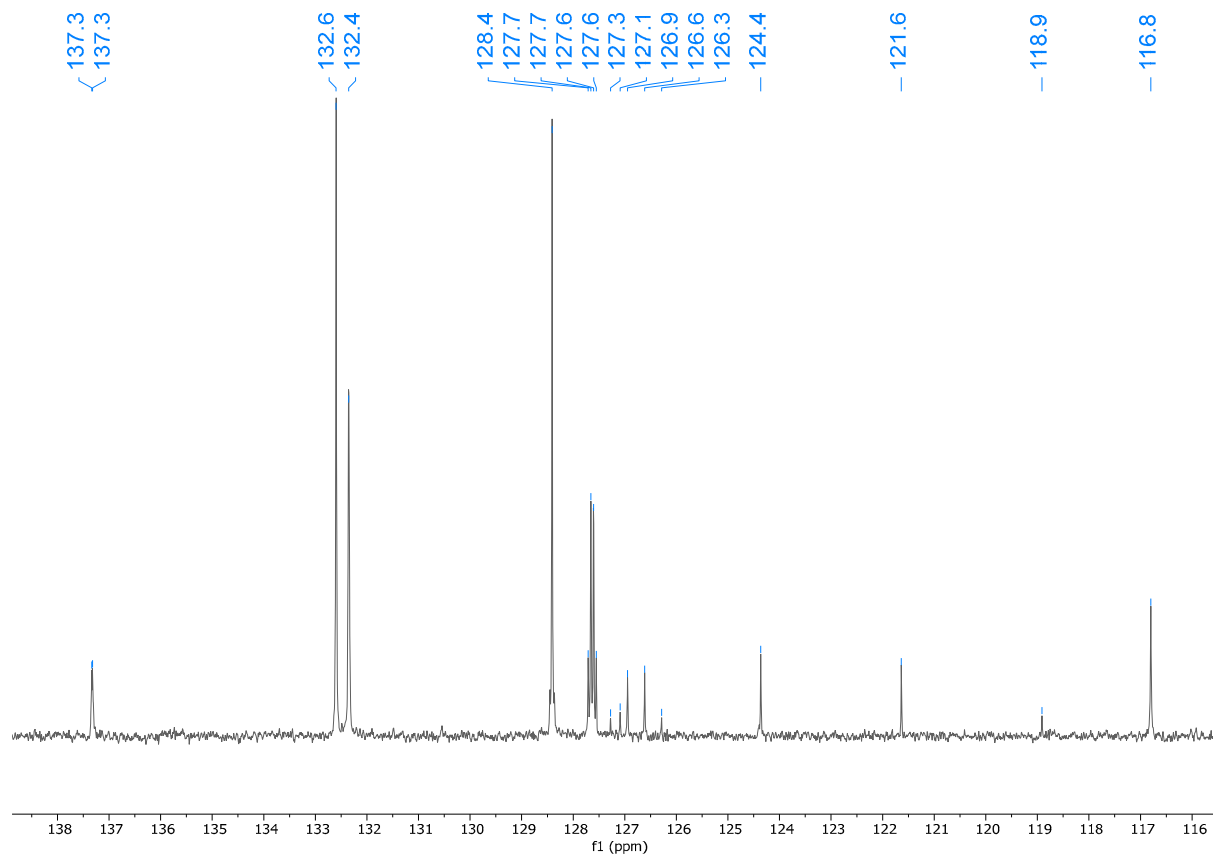

Figure S12F.  $^{13}\text{C}$ -NMR spectrum (CDCl<sub>3</sub>, 101 MHz) of N4 (aromatics, CF<sub>3</sub>, CN).

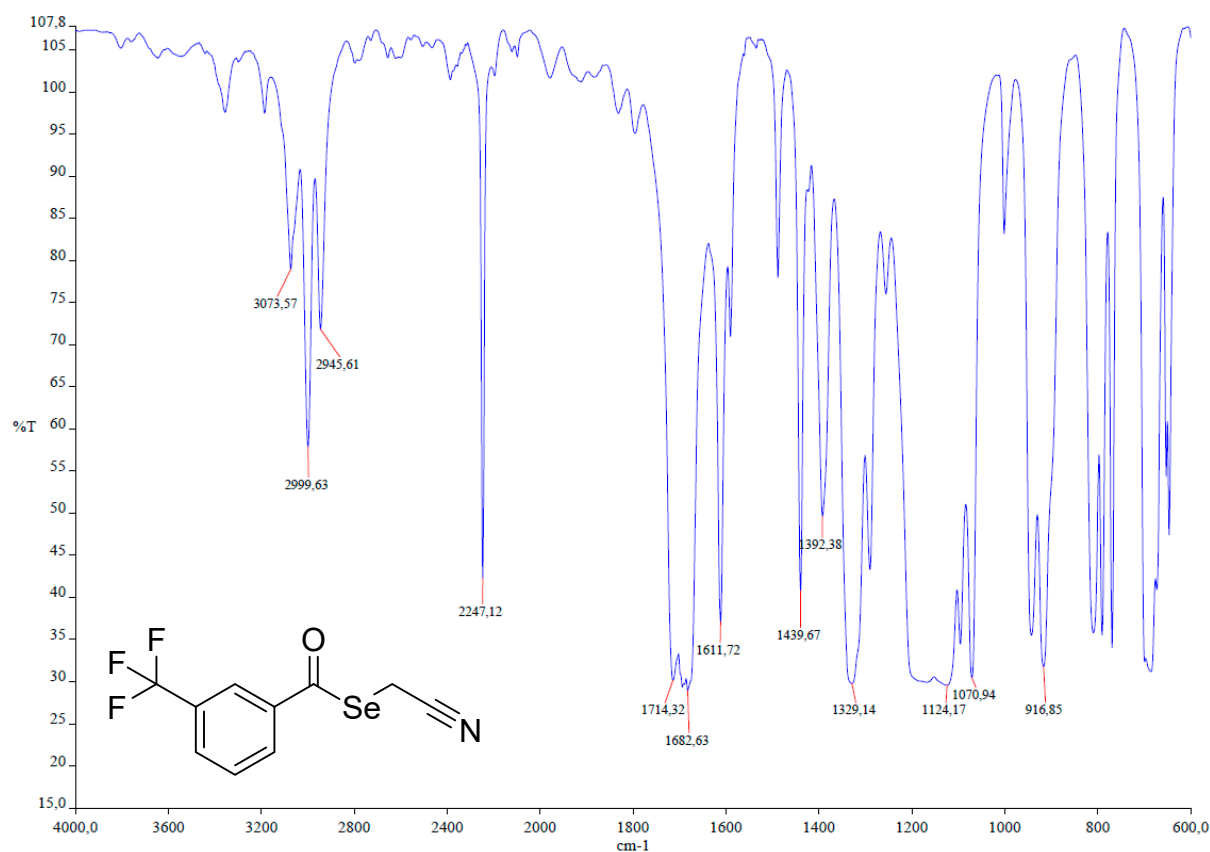

Figure S13. Compound N5: Se-(cyanomethyl) 3-(trifluoromethyl)benzoselenoate. S13A. IR spectrum (KBr) of N5.

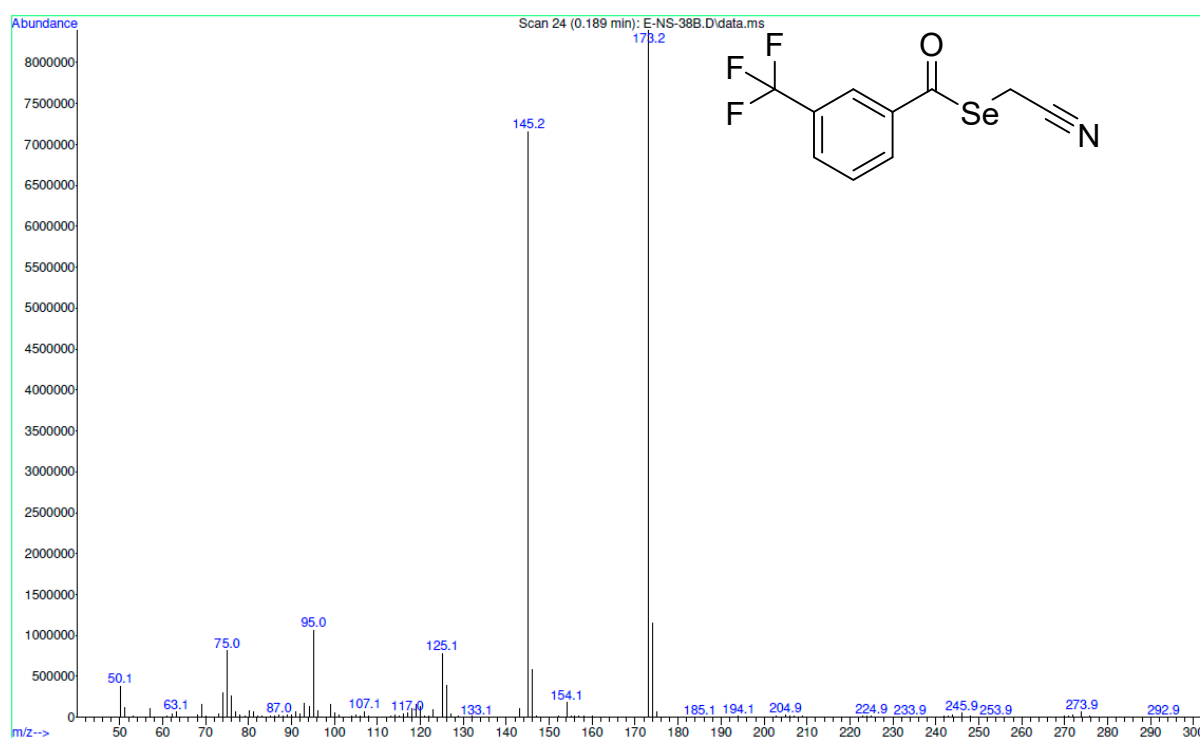

Figure S13B. DIP-MS spectrum of N5.

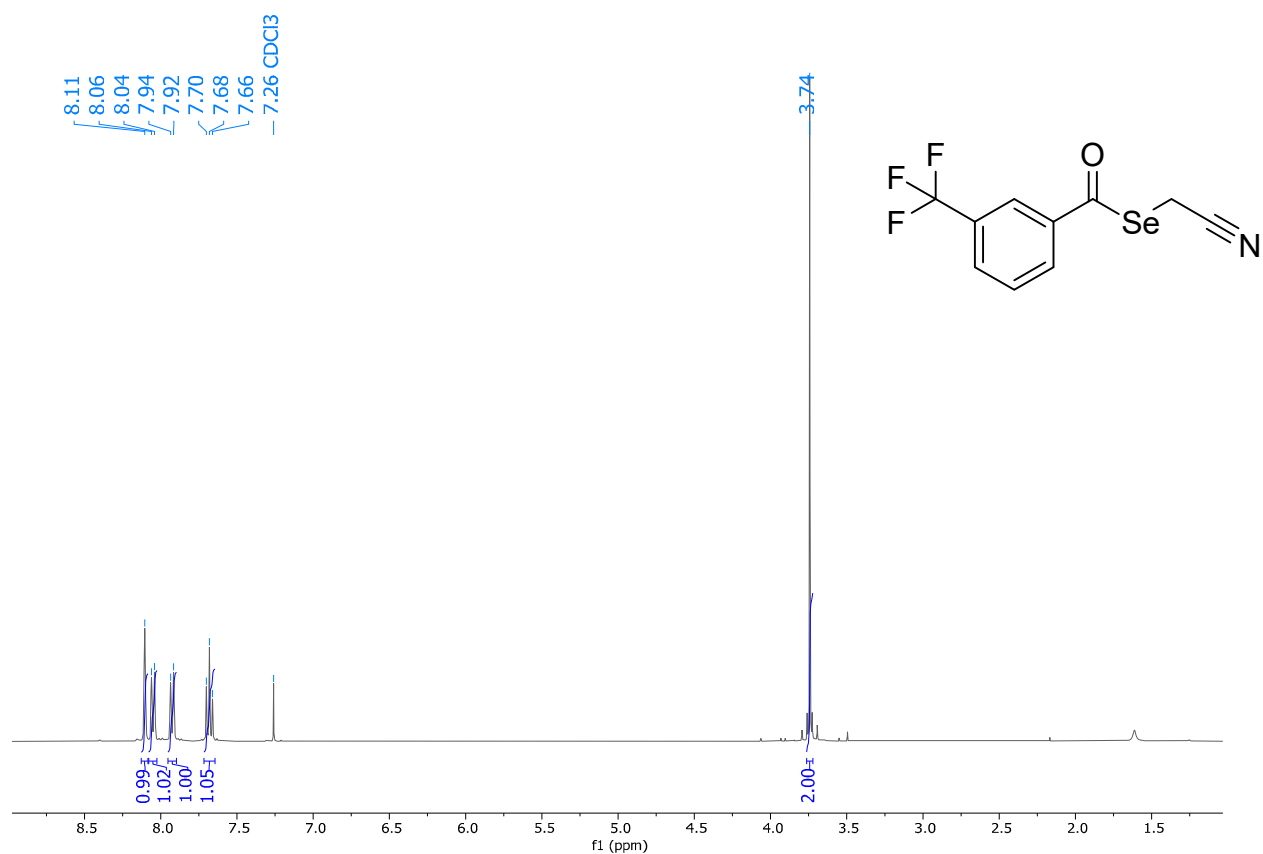

Figure S13C.  $^1\text{H}$ -NMR spectrum ( $\text{CDCl}_3$ , 400 MHz) of N5.

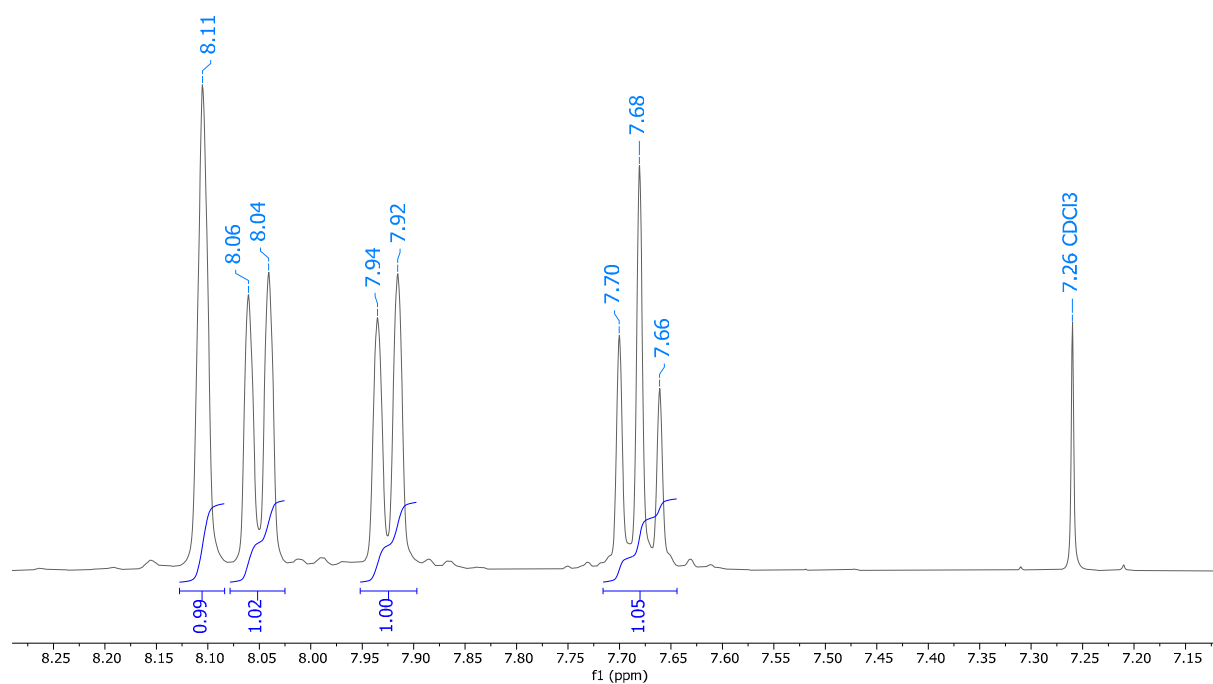

Figure S13D.  $^1\text{H}$ -NMR spectrum ( $\text{CDCl}_3$ , 400 MHz) of N5 (aromatics).

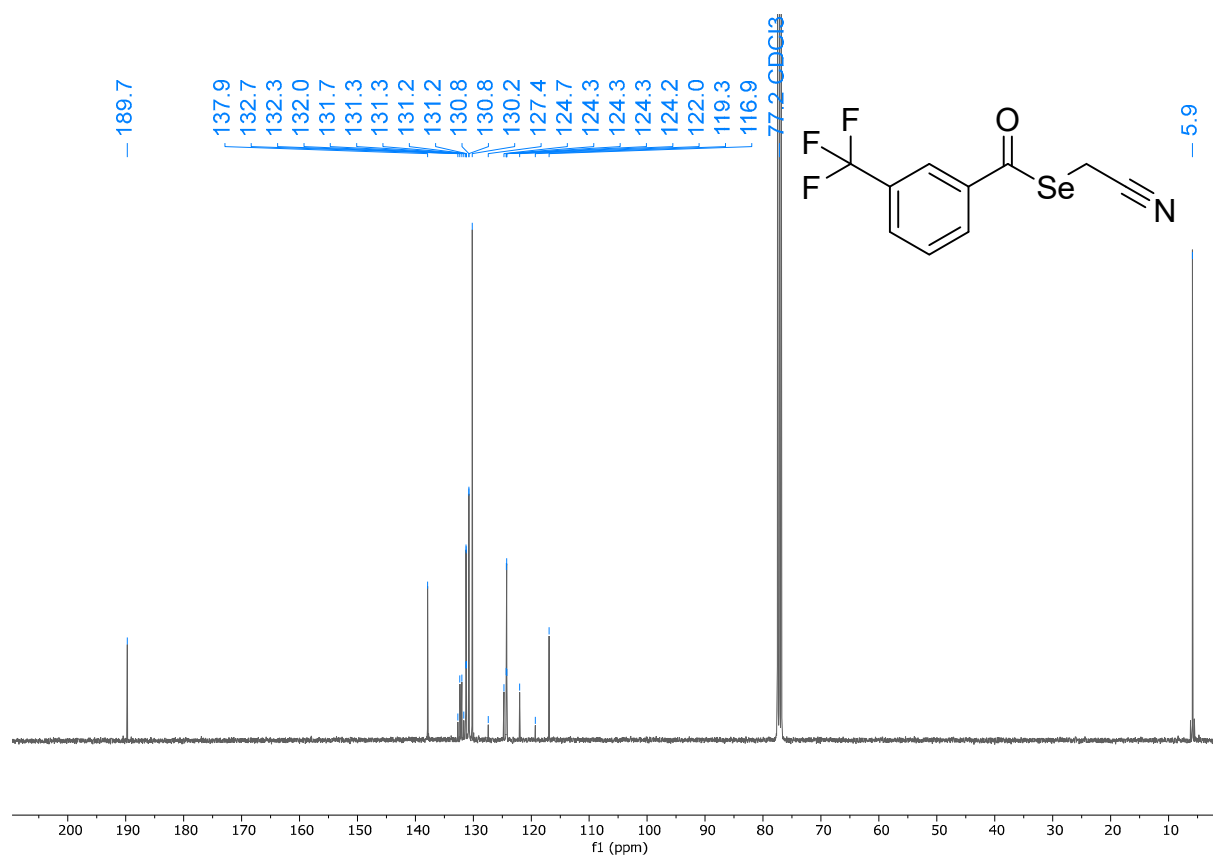

**Figure S13E.** <sup>13</sup>C-NMR spectrum (CDCl<sub>3</sub>, 101 MHz) of N5.

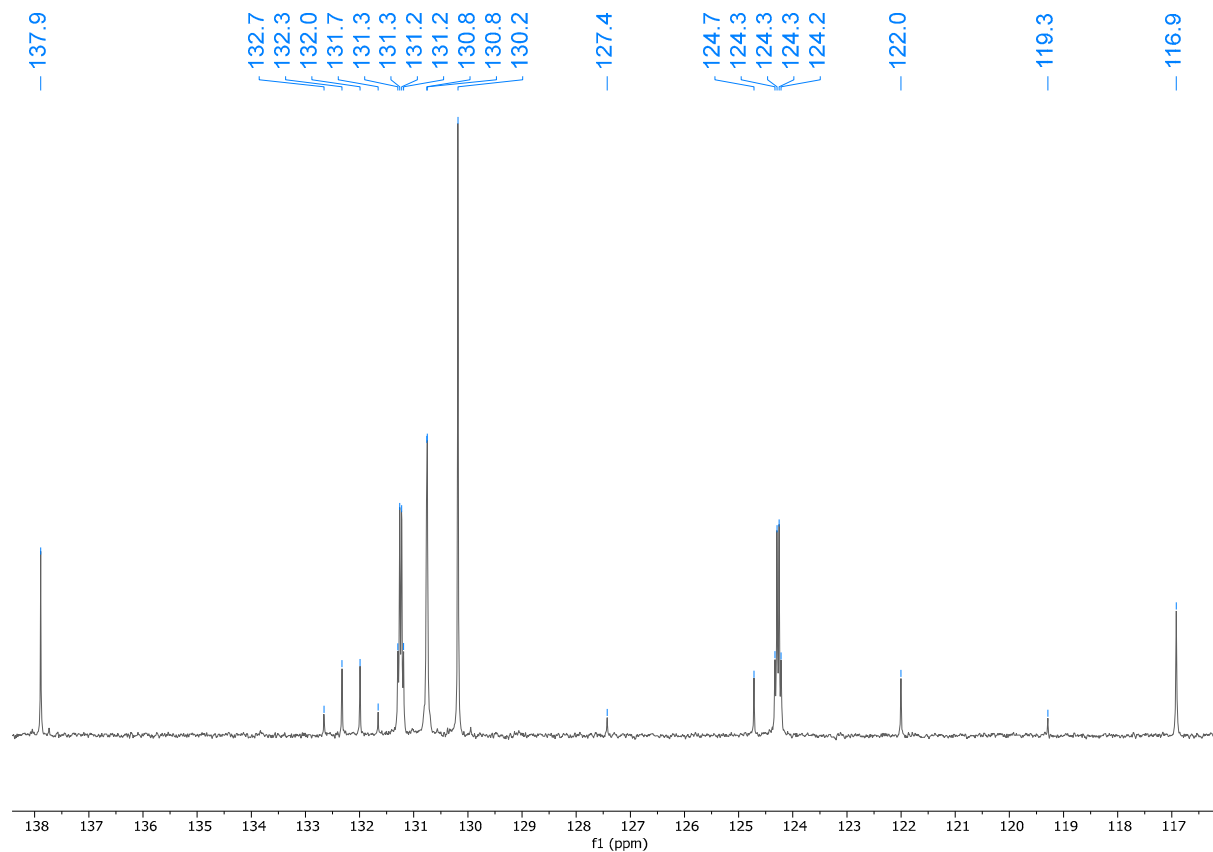

**Figure S13F.** <sup>13</sup>C-NMR spectrum (CDCl<sub>3</sub>, 101 MHz) of N5 (aromatics, CF<sub>3</sub>, CN).

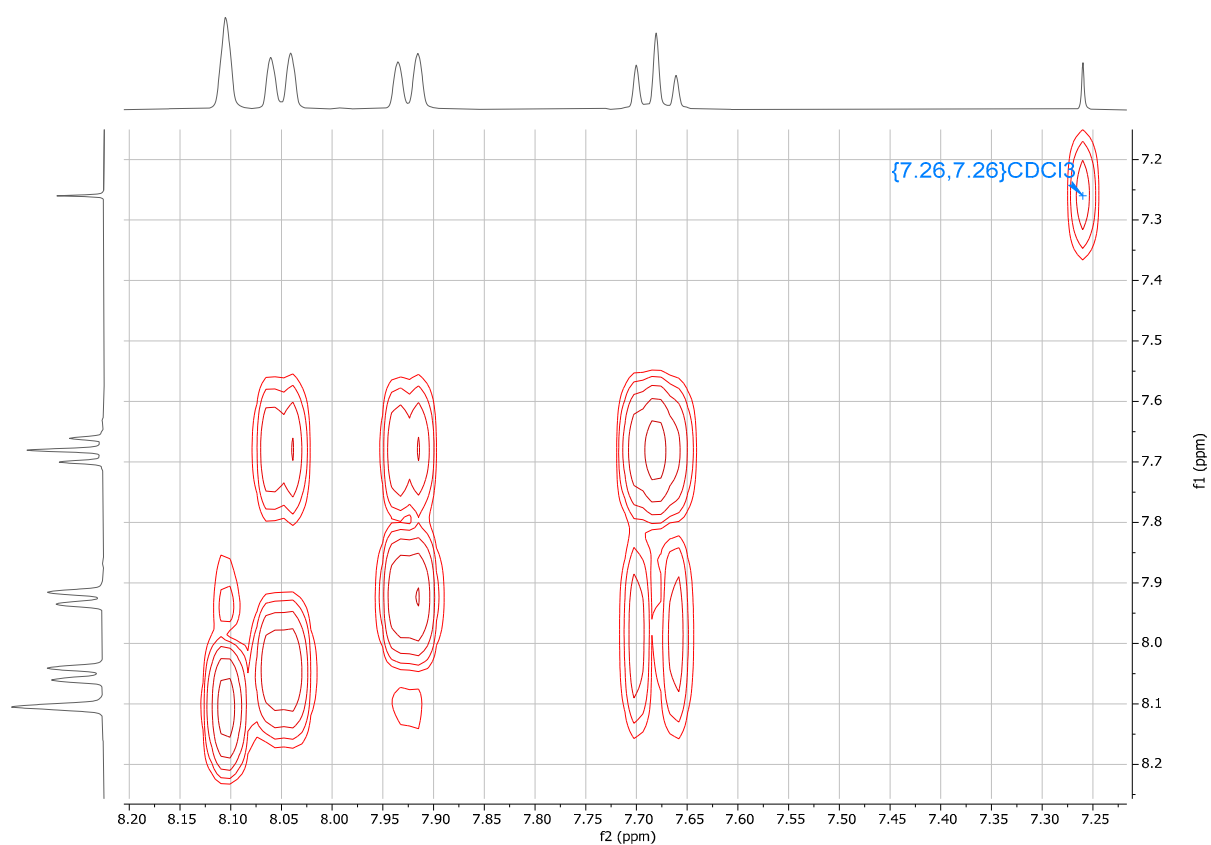

**Figure S13G.**  $^1\text{H}$ - $^1\text{H}$  COSY NMR spectrum ( $\text{CDCl}_3$ ) of N5 (aromatics).

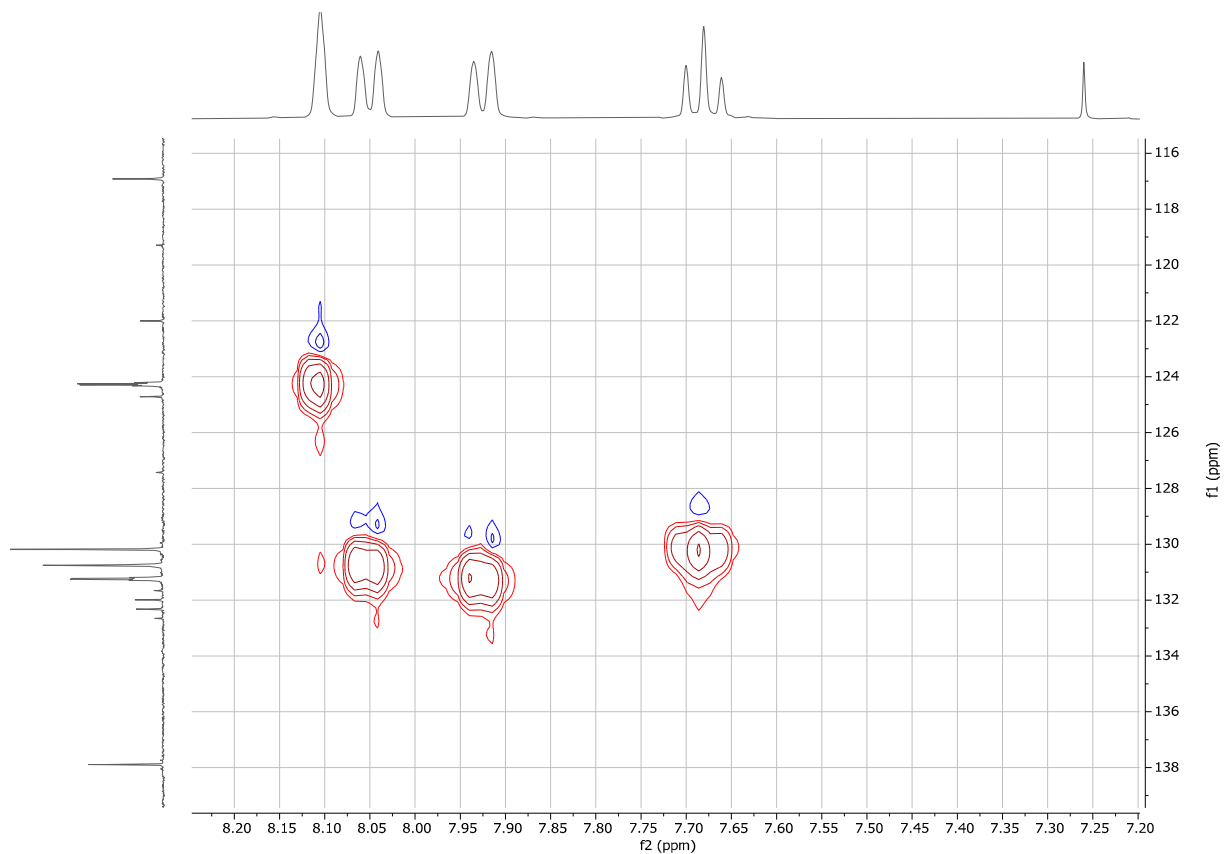

**Figure S13H.**  $^1\text{H}$ - $^{13}\text{C}$  HSQC NMR spectrum ( $\text{CDCl}_3$ ) of N5 (aromatics).

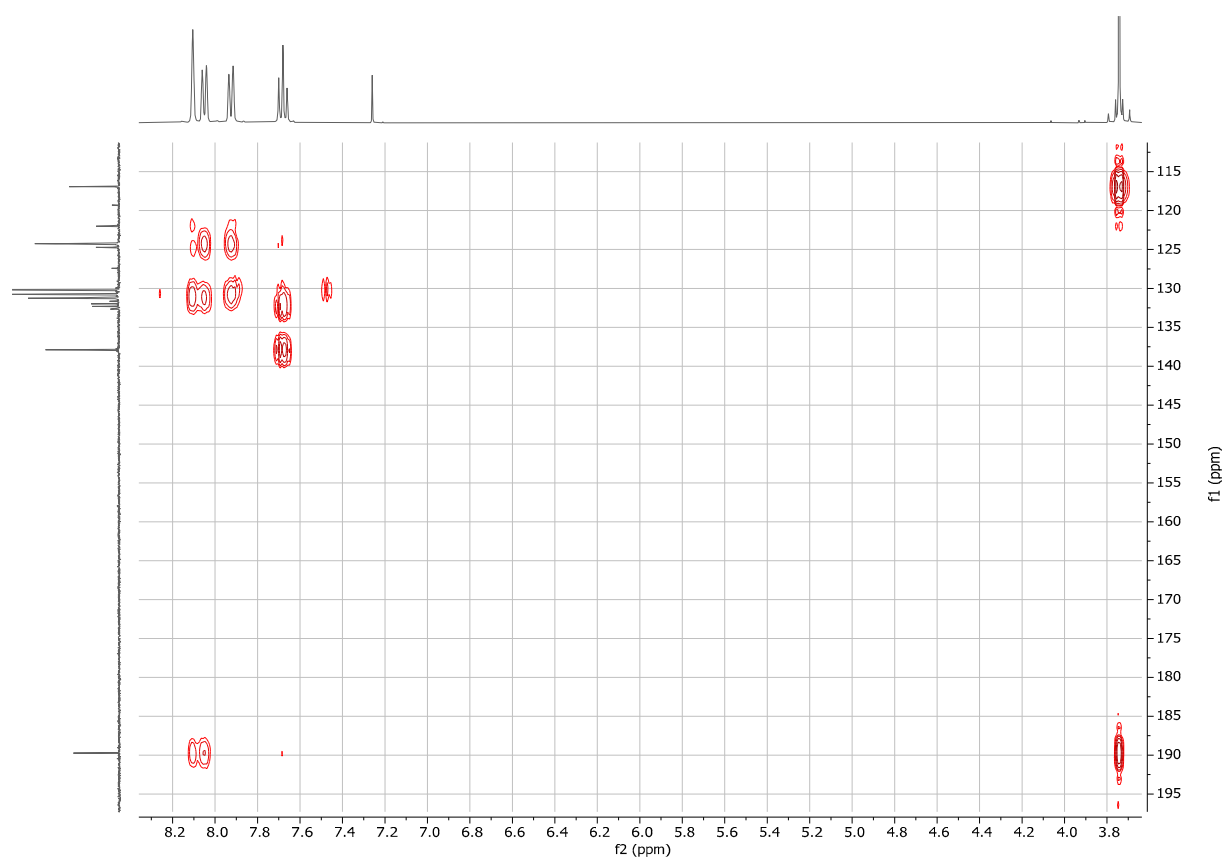

**Figure S13I.**  $^1\text{H}$ - $^{13}\text{C}$  HMBC NMR spectrum ( $\text{CDCl}_3$ ) of N5.



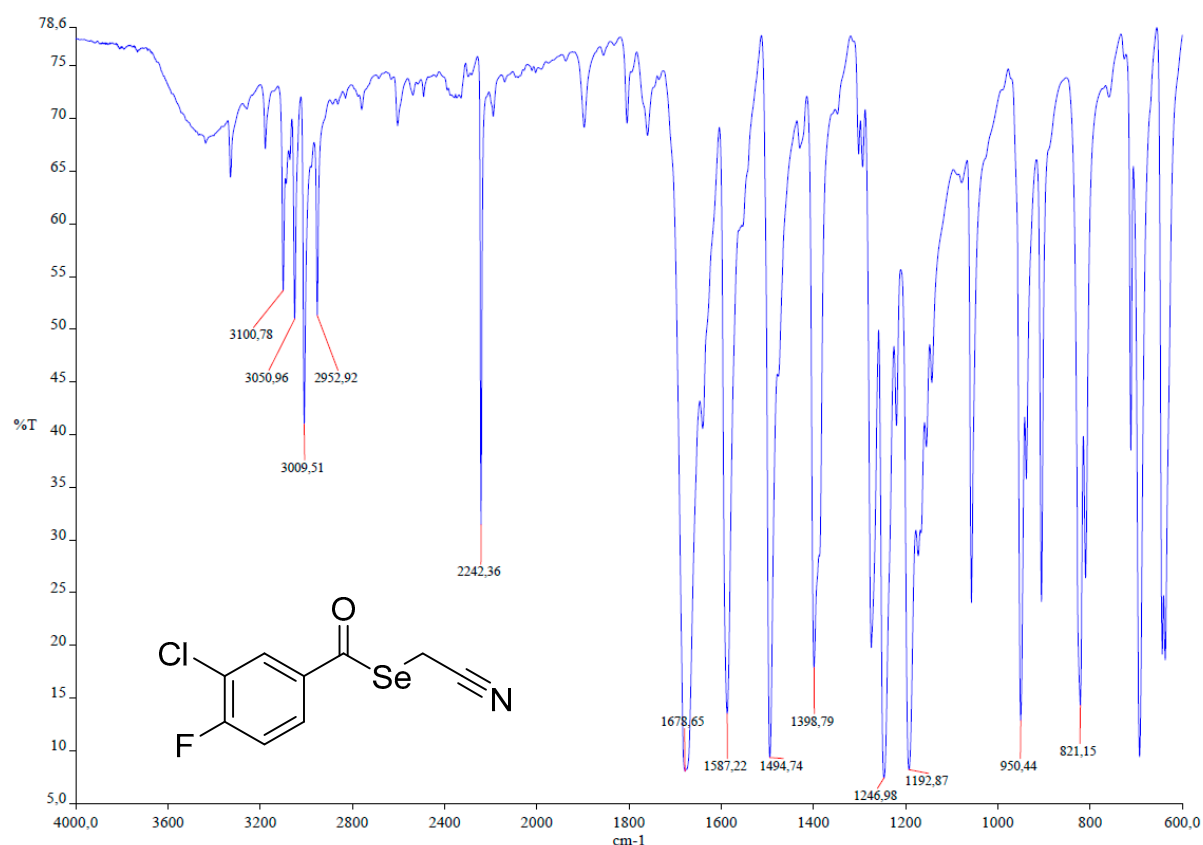

**Figure S14.** Compound N6: Se-(cyanomethyl) 3-chloro-4-fluorobenzoselenoate. S14A. IR spectrum (KBr) of N6.

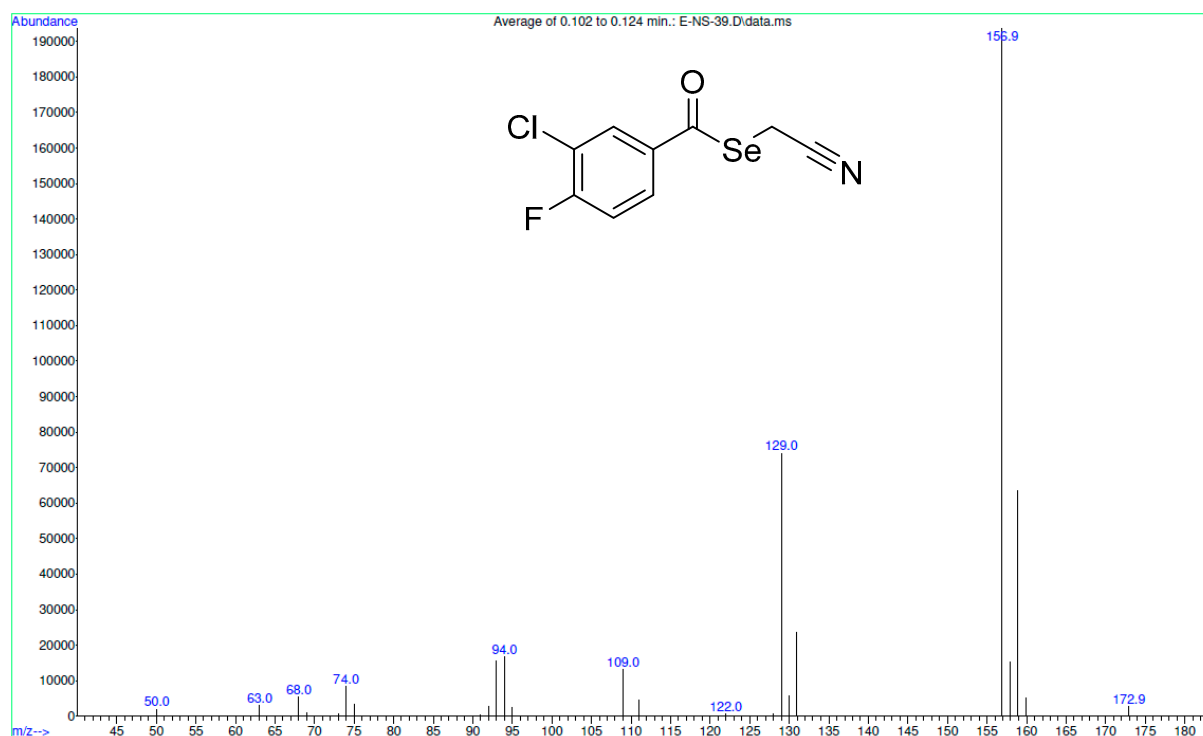

**Figure S14B.** DIP-MS spectrum of N6.

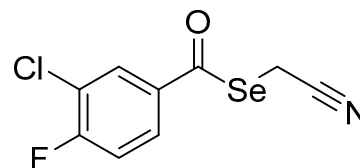

**Figure S14C.**  $^1\text{H}$ -NMR spectrum ( $\text{CDCl}_3$ , 400 MHz) of **N6**.

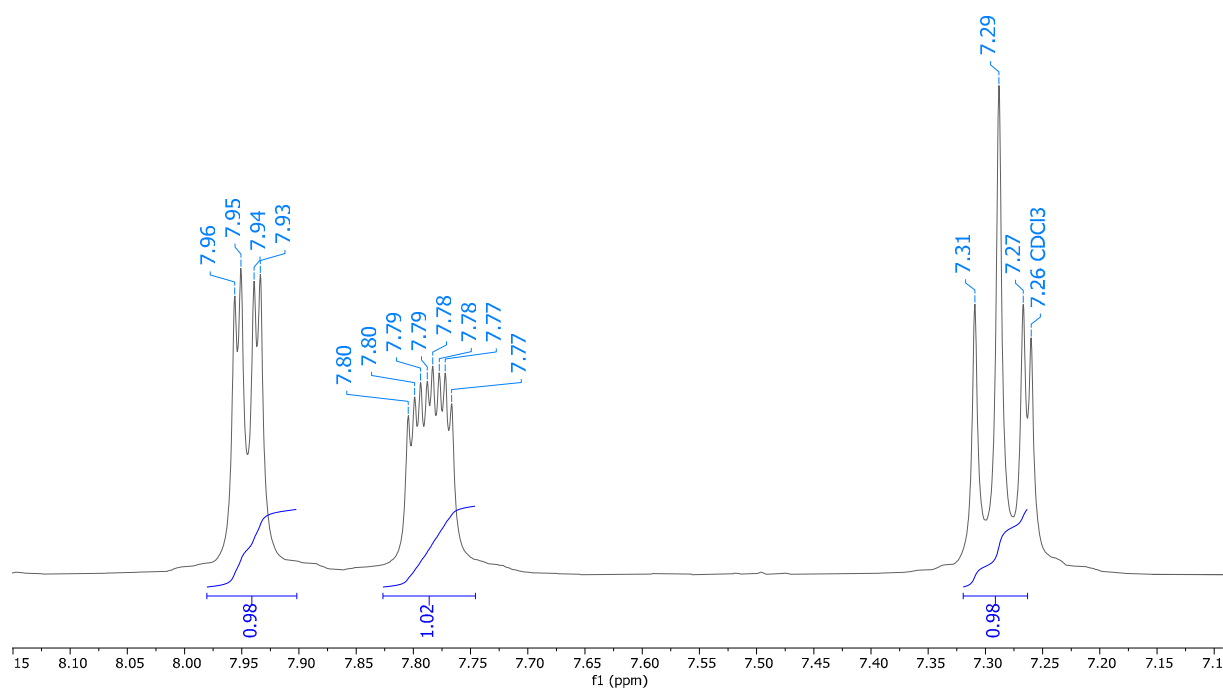

**Figure S14D.**  $^1\text{H}$ -NMR spectrum ( $\text{CDCl}_3$ , 400 MHz) of **N6** (aromatics).

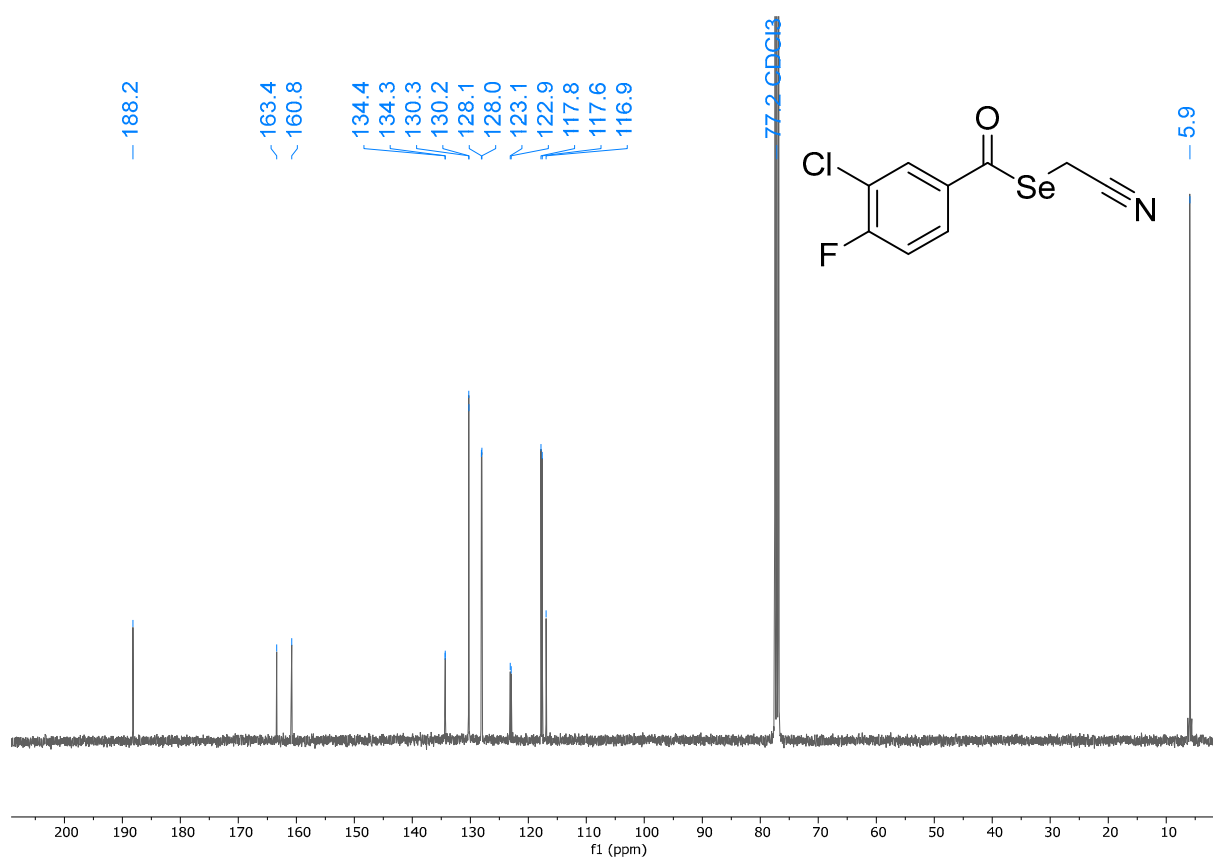

**Figure S14E.** <sup>13</sup>C-NMR spectrum (CDCl<sub>3</sub>, 101 MHz) of N6.

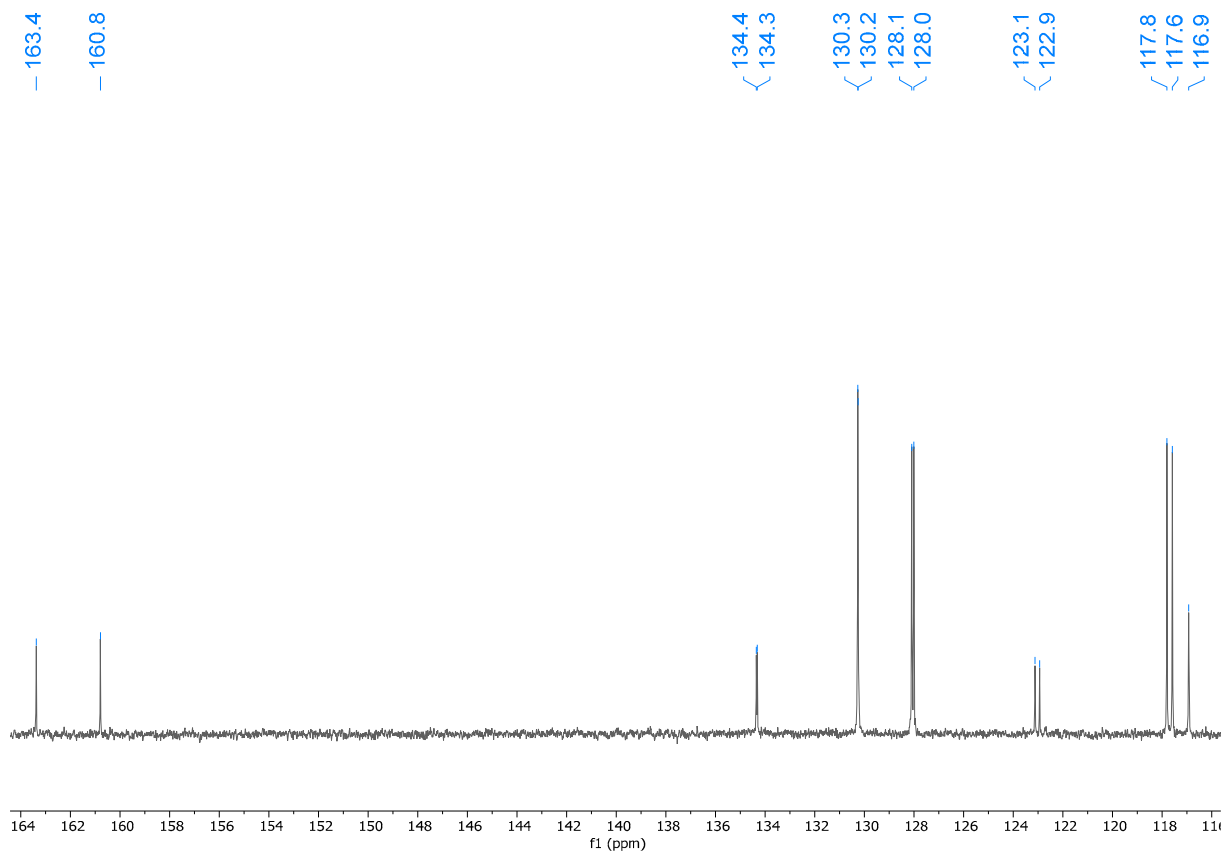

**Figure S14F.** <sup>13</sup>C-NMR spectrum (CDCl<sub>3</sub>, 101 MHz) of N6 (aromatics, CN).

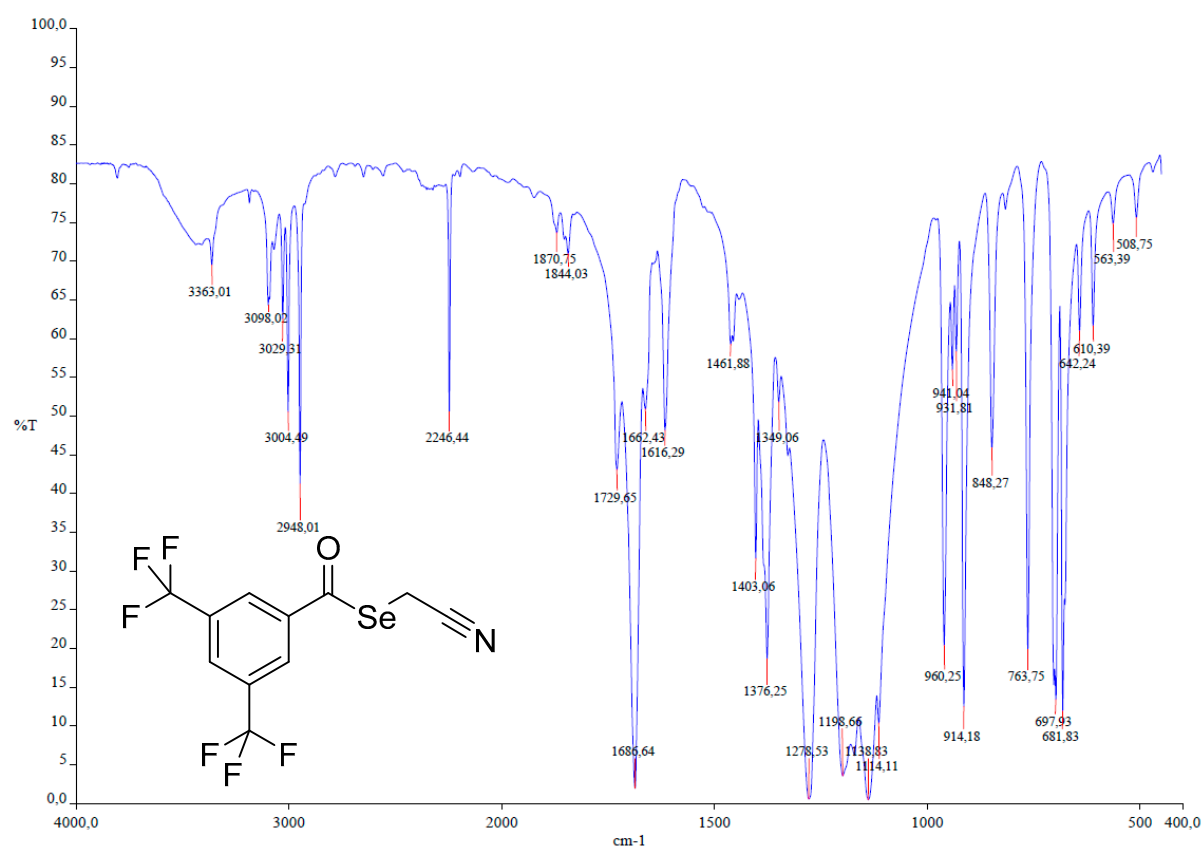

Figure S15. Compound N7: Se-(cyanomethyl) 3,5-bis(trifluoromethyl)benzoselenoate. S15A. IR spectrum (KBr) of N7.

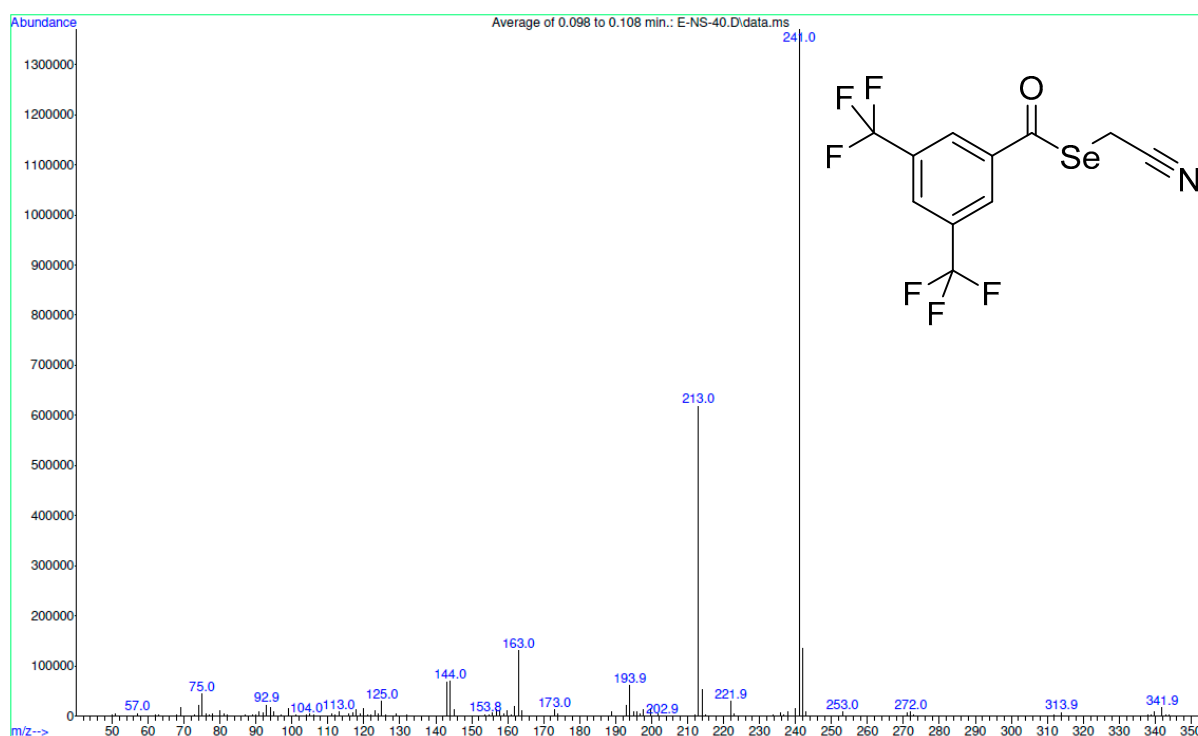

Figure S15B. DIP-MS spectrum of N7.

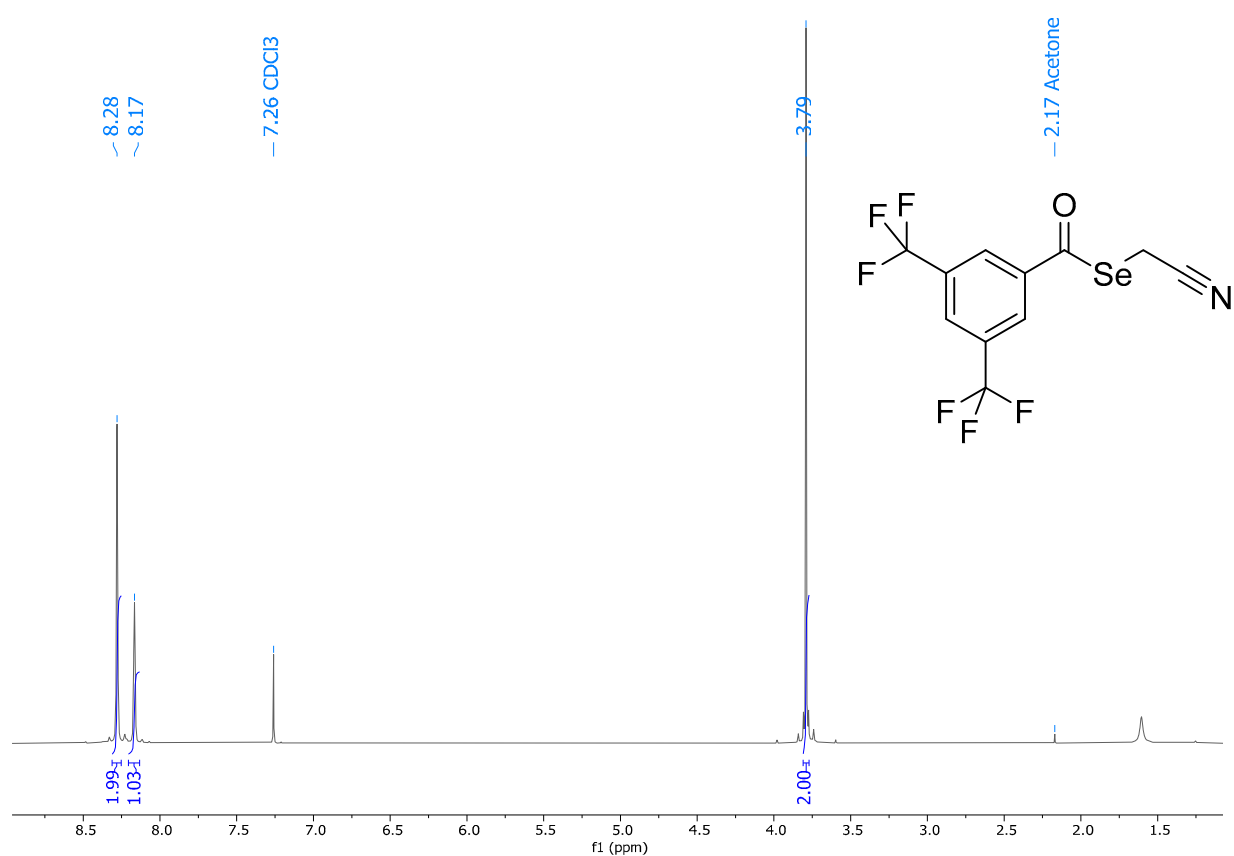

Figure S15C. <sup>1</sup>H-NMR spectrum (CDCl<sub>3</sub>, 400 MHz) of N7.

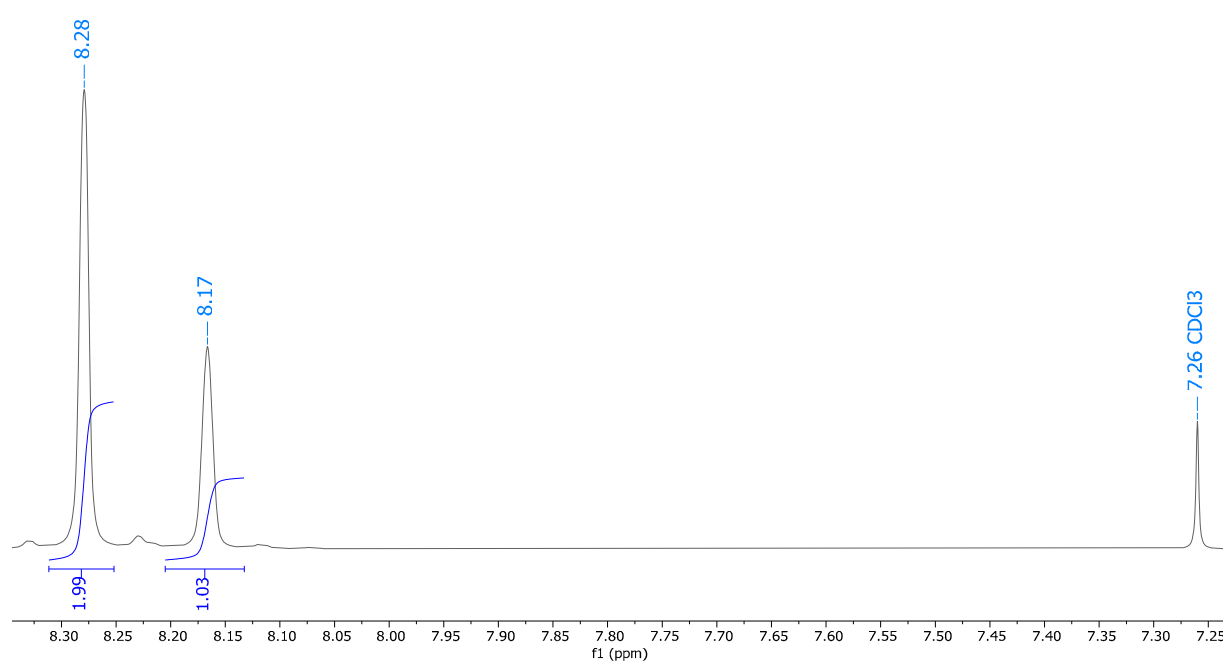

Figure S15D. <sup>1</sup>H-NMR spectrum (CDCl<sub>3</sub>, 400 MHz) of N7 (aromatics).

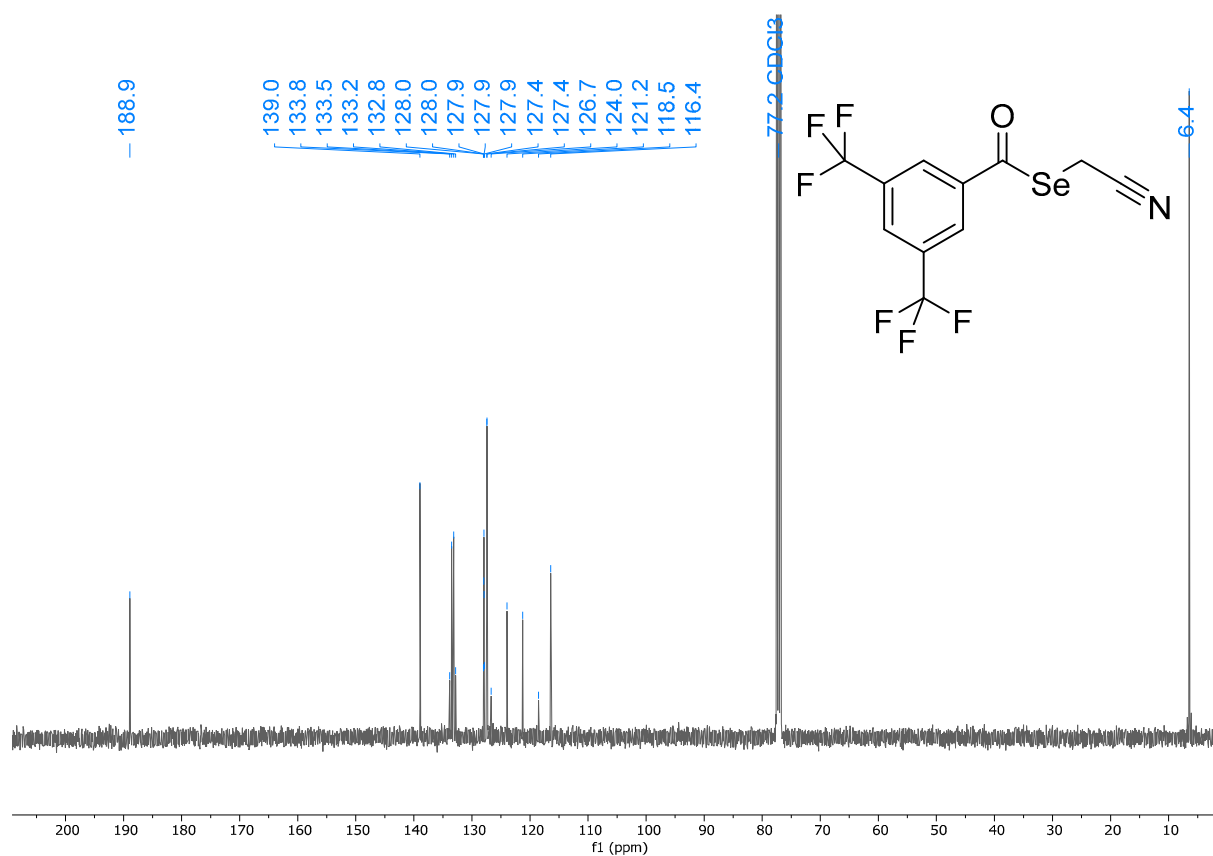

**Figure S15E.**  $^{13}\text{C}$ -NMR spectrum ( $\text{CDCl}_3$ , 101 MHz) of N7.

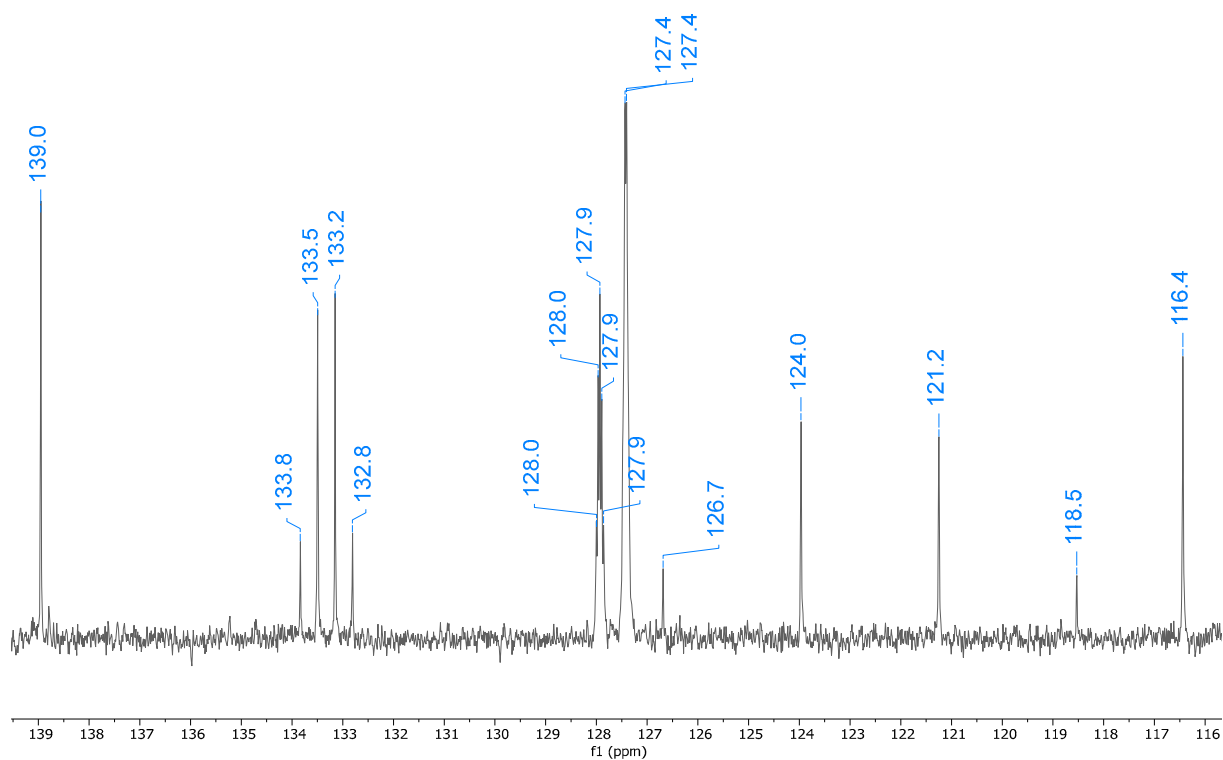

**Figure S15F.**  $^{13}\text{C}$ -NMR spectrum ( $\text{CDCl}_3$ , 101 MHz) of N7 (aromatics, CN).
